# Supplementary material for: Click assembly through selective azaylide formation
Source: Royal Society of Chemistry journal article supplement (doi:10.1039/d4cc02723j), 2024-01-01

## Supporting Information

# Click assembly through selective azaylide formation

Mayo Hamada, Gaku Orimoto, and Suguru Yoshida\*

*Department of Biological Science and Technology, Faculty of Advanced Engineering,  
Tokyo University of Science, 6-3-1 Nijuku, Katsushika-ku Tokyo 125-8585*

### Contents

|                                                                  |            |
|------------------------------------------------------------------|------------|
| <b>General Information</b>                                       | <b>S1</b>  |
| <b>Structures of Azaylides 4 and 5</b>                           | <b>S2</b>  |
| <b>Experimental Procedures</b>                                   | <b>S3</b>  |
| <b>Preliminary studies for the selective azaylide formations</b> | <b>S9</b>  |
| <b>Characterization Data of New Compounds</b>                    | <b>S10</b> |
| <b>HPLC Charts</b>                                               | <b>S22</b> |
| <b>References for Supporting Information</b>                     | <b>S23</b> |
| <b><sup>1</sup>H and <sup>13</sup>C NMR Spectra of Compounds</b> | <b>S24</b> |

### General Information

All reactions were performed with dry glassware under atmosphere of argon, unless otherwise noted. Analytical thin-layer chromatography (TLC) was performed on precoated (0.25 mm) silica-gel plates (Merck Chemicals, Silica Gel 60 F254, Cat. No. 1.05715). Column chromatography was conducted using silica-gel (Kanto Chemical Co., Inc., Silica Gel 60N, spherical neutral, particle size 40–50  $\mu\text{m}$ , Cat. No. 37562-85 or particle size 63–210  $\mu\text{m}$ , Cat. No. 37565-85). Preparative TLC (PTLC) was performed on silica gel (Wako Pure Chemical Industries Ltd., Wakogel B-5F, Cat. No. 230-00043). Melting points (Mp) were measured on an OptiMelt MPA100 (Stanford Research Systems), and are uncorrected. <sup>1</sup>H NMR spectra were obtained with a Bruker AVANCE 400 spectrometer at 400 MHz. <sup>13</sup>C NMR spectra were obtained with a Bruker AVANCE 400 spectrometer at 101 MHz. <sup>19</sup>F NMR spectra were obtained with a Bruker AVANCE 400 spectrometer at 377 MHz. <sup>31</sup>P NMR spectra were obtained with a Bruker AVANCE 400 spectrometer at 162 MHz. All NMR measurements were carried out at 25 °C. CDCl<sub>3</sub> (Kanto Chemical Co. Inc., Cat. No. 07663-23) was used as a solvent for obtaining NMR spectra. Chemical shifts ( $\delta$ ) are given in parts per million (ppm) downfield from the solvent peak ( $\delta$  7.26 for <sup>1</sup>H NMR in CDCl<sub>3</sub>,  $\delta$  77.0 for <sup>13</sup>C NMR in CDCl<sub>3</sub>) as an internal reference or  $\alpha,\alpha,\alpha$ -trifluorotoluene ( $\delta$  –63.0 ppm for <sup>19</sup>F NMR in CDCl<sub>3</sub>) or phosphoric acid ( $\delta$  0.00 ppm for <sup>31</sup>P NMR in D<sub>2</sub>O) as an external standard with coupling constants (J) in hertz (Hz). The abbreviations s, d, t, q, and m signify singlet, doublet, triplet, quartet, and multiplet, respectively. IR spectra were measured on a Shimadzu IRSpirit spectrometer with the absorption band given in cm<sup>-1</sup>. The absorbance spectra (UV/Vis) and fluorescence spectra (FL) were measured with a JASCO UV-750 spectrophotometer and a JASCO FP-8250 spectrofluorophotometer, respectively, at 25 °C using a quartz cuvette (10 mm light path). High-performance liquid chromatography (HPLC) was performed on a Shimadzu Prominence HPLC system (CBM-20A lite, LC-20AD  $\times$  2, DGU-20A3R, SUS316L, and CTO-20A) equipped with a Shimadzu SPD-20A UV/Vis detector. High-resolution mass spectra (HRMS) were measured on a JEOL JMS-T100CS “AccuTOF CS” mass spectrometer under positive electrospray ionization (ESI<sup>+</sup>) conditions.

Unless otherwise noted, materials obtained from commercial suppliers were used without further purification. 4-Azido-3,5-dichlorobenzoic acid (**1b**),<sup>S1</sup> 4-azido-2,3,5,6-tetrafluorobenzoic acid,<sup>S2</sup> methyl 2-(diphenylphosphaneyl)benzoate (**3b**),<sup>S3</sup> methyl 2-(diphenylphosphaneyl)benzoate (**3c**),<sup>S3</sup> diphenyl(*o*-tolyl)phosphane (**3d**),<sup>S3</sup> (2-fluorophenyl)diphenylphosphane (**3e**),<sup>S3</sup> (2-chlorophenyl)diphenylphosphane (**3f**),<sup>S3</sup> (2-bromophenyl)diphenylphosphane (**3g**),<sup>S3</sup> methyl 4-(diphenylphosphaneyl)benzoate (**3h**),<sup>S3</sup> dimethyl 2-(diphenylphosphaneyl)terephthalate (**3j**),<sup>S4</sup> methyl 4-(butylcarbamoyl)-2-(diphenylphosphaneyl)benzoate (**3k**),<sup>S5</sup> *tert*-butyl (2-(2-(2-(2-aminoethoxy)ethoxy)ethoxy)ethyl)carbamate (**7**),<sup>S6</sup> *tert*-butyl (2-(2-(2-(2-azidoethoxy)ethoxy)ethoxy)ethyl)carbamate (**12**),<sup>S6</sup> methyl 6-(azidomethyl)nicotinate (**18**),<sup>S7</sup> 2-methoxyethan-1-amine-1-chloropentane,<sup>S8</sup> 9-(azidomethyl)-2,3,6,7-tetrahydro-1*H*,5*H*,11*H*-pyrano[2,3-*f*]pyrido[3,2,1-*ij*]quinolin-11-one,<sup>S9</sup> and *N*-(4-(2-(2-azidoethoxy)ethoxy)-1-( $\lambda^1$ -oxidaneyl)butan-2-yl)-5-(2-oxohexahydro-1*H*-thieno[3,4-*d*]imidazol-4-yl)pentanamide (**22**)<sup>S10</sup> were prepared according to the reported method.

**CAUTION!** Azids are potentially explosive. Although we have never experienced such an explosion, all manipulations should be carefully carried out behind a safety shield in a hood.

## Structures of Azaylides 4 and 5

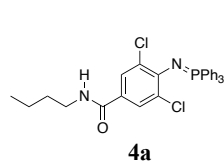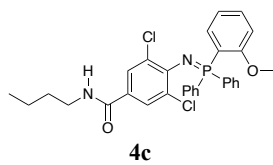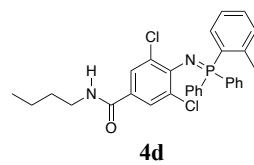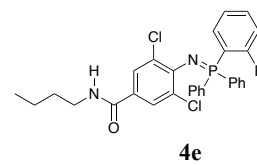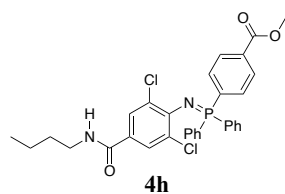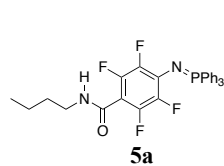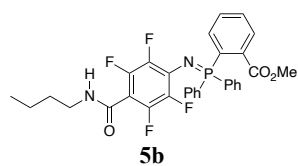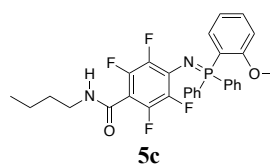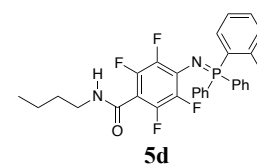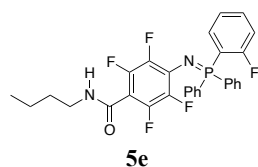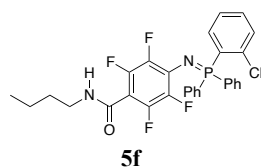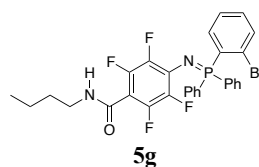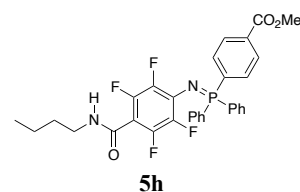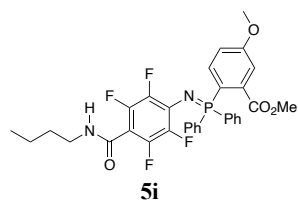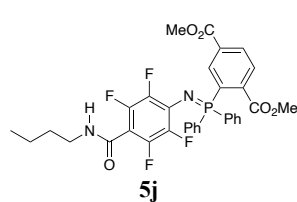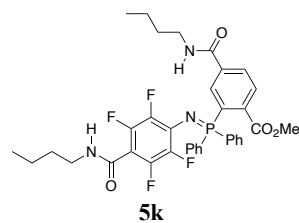

## Experimental Procedures

A typical procedure for the screening of competition experiment between 4-azido-*N*-butyl-3,5-dichlorobenzamide (**1a**) and 4-azido-*N*-butyl-2,3,5,6-tetrafluorobenzamide (**2a**) with triphenylphosphine

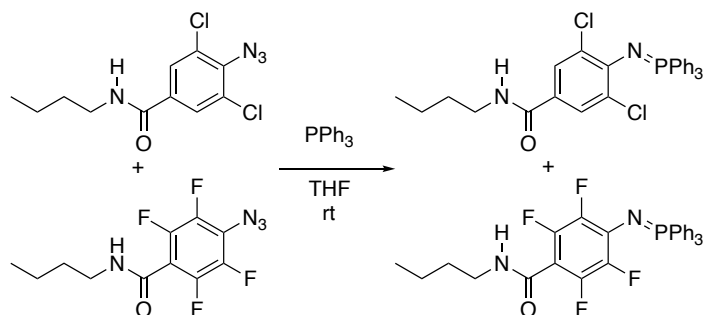

To a mixture of 4-azido-*N*-butyl-3,5-dichlorobenzamide (**1a**) (14.4 mg, 50.2  $\mu\text{mol}$ , 1.1 equiv) and 4-azido-*N*-butyl-2,3,5,6-tetrafluorobenzamide (**2a**) (14.7 mg, 50.7  $\mu\text{mol}$ , 1.1 equiv) dissolved in THF (250  $\mu\text{L}$ ) was added a solution of triphenylphosphine (**3a**) (11.8 mg, 45.0  $\mu\text{mol}$ , 1.0 equiv) dissolved in THF (250  $\mu\text{L}$ ) at room temperature. After stirring for 4 h at the same temperature, the mixture was concentrated in vacuo. To the mixture was added hexamethylphosphoric triamide (HMPA) (11.5 mg, 68.5  $\mu\text{mol}$ ) as an internal standard. The yields of **4a** and **5a** were determined by  $^{31}\text{P}$  NMR analysis (162 MHz) to be 19% and 81%, respectively, by comparing the relative values of integration for the peaks observed at 2.1 ppm (for **4a**) and 10.2 ppm (for **5a**) with that of HMPA observed at 25.7 ppm.

A typical procedure for the stability check of azaylides under various conditions

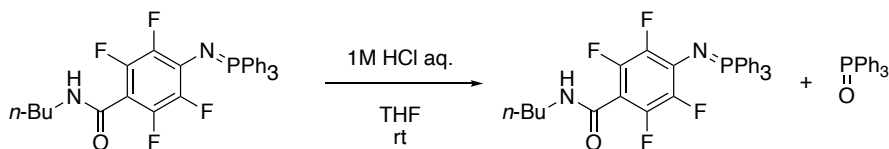

To a solution of *N*-butyl-2,3,5,6-tetrafluoro-4-((triphenyl- $\lambda_5$ -phosphaneylidene)amino)benzamide (**5a**) (15.8 mg, 30.1  $\mu\text{mol}$ ) dissolved in THF (150  $\mu\text{L}$ ) was added an aqueous solution of HCl (1.0 M, 150  $\mu\text{L}$ , 0.15 mmol, 5.0 equiv) at room temperature. After stirring for 16 h at the same temperature, the mixture was extracted with EtOAc (5 mL  $\times$  3). The combined organic extract was dried with  $\text{Na}_2\text{SO}_4$ . After filtration, the filtrate was concentrated under reduced pressure. To the residue was added HMPA (15.5 mg, 86.5  $\mu\text{mol}$ ) as an internal standard. Azaylide **5a** was not observed. The yield of triphenylphosphine oxide (**6a**) was determined by  $^{31}\text{P}$  NMR analysis (162 MHz) to be quantitative by comparing the relative value of integration for the peak observed at 29.1 ppm (for **6a**) with that of HMPA observed at 25.7 ppm.

A typical procedure for the stability check of azaylides under various conditions

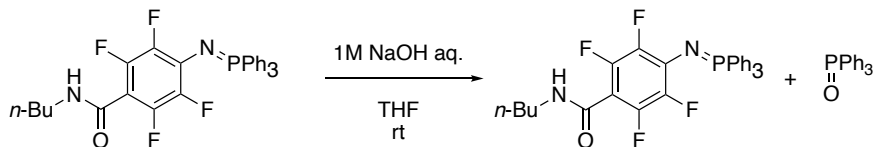

To a solution of *N*-butyl-2,3,5,6-tetrafluoro-4-((triphenyl- $\lambda_5$ -phosphaneylidene)amino)benzamide (**5a**) (16.0 mg, 30.5  $\mu\text{mol}$ ) dissolved in THF (150  $\mu\text{L}$ ) was added an aqueous solution of NaOH (1.0 M, 150  $\mu\text{L}$ , 0.15 mmol, 5.0 equiv) at room temperature. After stirring for 16 h at the same temperature, the mixture was extracted with EtOAc (5 mL  $\times$  3). The combined organic extract was dried with  $\text{Na}_2\text{SO}_4$ . After filtration, the filtrate was

concentrated under reduced pressure. To the residue was added HMPA (6.6 mg, 37  $\mu\text{mol}$ ) as an internal standard. The recovered amount of **5a** was determined by  $^{31}\text{P}$  NMR analysis (162 MHz) to be quantitative by comparing the relative value of integration for the peak observed at 10.2 ppm (for **5a**) with that of HMPA observed at 25.7 ppm. Phosphine oxide **6a** was not observed.

*A typical procedure for the preparation of azaylides by selective Staudinger reaction*

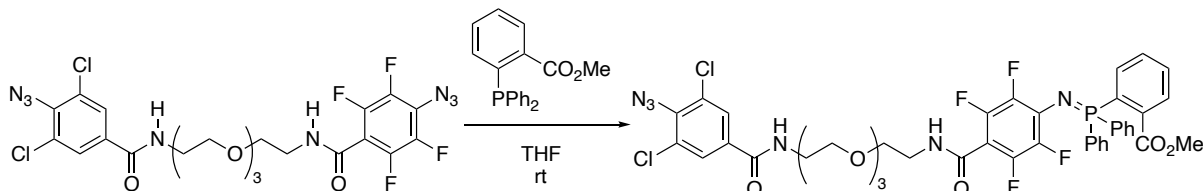

To a solution of 4-azido-*N*-(1-(4-azido-3,5-dichlorophenyl)-1-oxo-5,8,11-trioxa-2-azatridecan-13-yl)-2,3,5,6-tetrafluorobenzamide (**9**) (29.9 mg, 47.9  $\mu\text{mol}$ , 1.2 equiv) in THF (250  $\mu\text{L}$ ) was added methyl 2-(diphenylphosphanyl)benzoate (**3b**) (12.9 mg, 40.3  $\mu\text{mol}$ , 1.0 equiv) at room temperature. After stirring for 4 h at the same temperature, the mixture was concentrated under reduced pressure. The residue was purified by preparative TLC ( $\text{CH}_2\text{Cl}_2/\text{MeOH} = 30/1$ ) to give methyl 2-(*N*-(4-((1-(4-azido-3,5-dichlorophenyl)-1-oxo-5,8,11-trioxa-2-azatridecan-13-yl)carbamoyl)-2,3,5,6-tetrafluorophenyl)-*P,P*-diphenylphosphorimidoyl)benzoate (**10**) (38.6 mg, <42.4  $\mu\text{mol}$ , quant.) as a colorless solid.

According to the procedure for preparing methyl 2-(*N*-(4-((1-(4-azido-3,5-dichlorophenyl)-1-oxo-5,8,11-trioxa-2-azatridecan-13-yl)carbamoyl)-2,3,5,6-tetrafluorophenyl)-*P,P*-diphenylphosphorimidoyl)benzoate (**10**), methyl 2-(*N*-(4-((12-(4-azido-3,5-dichlorobenzoyl)-3,6,9-trioxa-12-azapentadec-14-yn-1-yl)carbamoyl)-2,3,5,6-tetrafluorophenyl)-*P,P*-diphenylphosphorimidoyl)benzoate (**S1**) and methyl 2-(*N*-(4-((12-(4-azido-3,5-dichlorobenzoyl)-3,6,9-trioxa-12-azapentadec-14-yn-1-yl)carbamoyl)-2,3,5,6-tetrafluorophenyl)-*P,P*-diphenylphosphorimidoyl)-4-((2-(2-((6-chlorohexyl)oxy)ethoxy)ethyl)carbamoyl)benzoate (**S2**) were prepared from diazide **16** and the corresponding phosphines.

*A typical procedure for the preparation of bis(iminophosphorane)s*

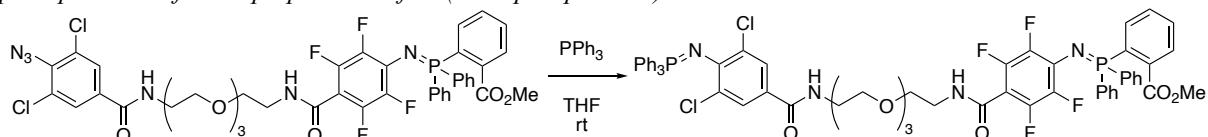

To a solution of methyl 2-(*N*-(4-((1-(4-azido-3,5-dichlorophenyl)-1-oxo-5,8,11-trioxa-2-azatridecan-13-yl)carbamoyl)-2,3,5,6-tetrafluorophenyl)-*P,P*-diphenylphosphorimidoyl)benzoate (38.6 mg, 42.2  $\mu\text{mol}$ , 1.0 equiv) in THF (250  $\mu\text{L}$ ) was added triphenylphosphine (**3a**) (16.1 mg, 61.4  $\mu\text{mol}$ , 1.5 equiv) at room temperature. After stirring for 4 h at the same temperature, the mixture was concentrated under reduced pressure. The residue was purified by preparative TLC ( $\text{CH}_2\text{Cl}_2/\text{MeOH} = 25/1$ ) to give methyl 2-(*N*-(4-((1-(3,5-dichloro-4-((triphenyl- $\lambda^5$ -phosphaneylidene)amino)phenyl)-1-oxo-5,8,11-trioxa-2-azatridecan- $\lambda_3$ -yl)carbamoyl)-2,3,5,6-tetrafluorophenyl)-*P,P*-diphenylphosphorimidoyl)benzoate (**11**) (39.4 mg, 34.3  $\mu\text{mol}$ , 81%) as a colorless solid.

According to the procedure for preparing methyl 2-(*N*-(4-((1-(3,5-dichloro-4-((triphenyl- $\lambda^5$ -phosphaneylidene)amino)phenyl)-1-oxo-5,8,11-trioxa-2-azatridecan- $\lambda_3$ -yl)carbamoyl)-2,3,5,6-tetrafluorophenyl)-*P,P*-diphenylphosphorimidoyl)benzoate (**11**), methyl 2-(*N*-(4-((12-(3,5-dichloro-4-((triphenyl- $\lambda^5$ -phosphaneylidene)amino)benzoyl)-3,6,9-trioxa-12-azapentadec-14-yn-1-yl)carbamoyl)-2,3,5,6-tetrafluorophenyl)-*P,P*-diphenylphosphorimidoyl)benzoate (**S3**) and methyl 4-((2-(2-((6-chlorohexyl)oxy)ethoxy)ethyl)carbamoyl)-2-(*N*-(4-((12-(3,5-dichloro-4-((4-((11-oxo-2,3,6,7-tetrahydro-1*H*,5*H*,11*H*-pyrano[2,3-*f*]pyrido[3,2-*i*]-quinolin-9-yl)methyl)carbamoyl)phenyl)diphenyl- $\lambda^5$ -phosphaneylidene)amino)benzoyl)-3,6,9-trioxa-12-azapentadec-14-yn-1-yl)carbamoyl)-2,3,5,6-tetrafluorophenyl)-*P,P*-diphenylphosphorimidoyl)benzoate (**S4**) were prepared from the corresponding azides.

*A typical procedure for the copper-catalyzed azide-alkyne cycloaddition*

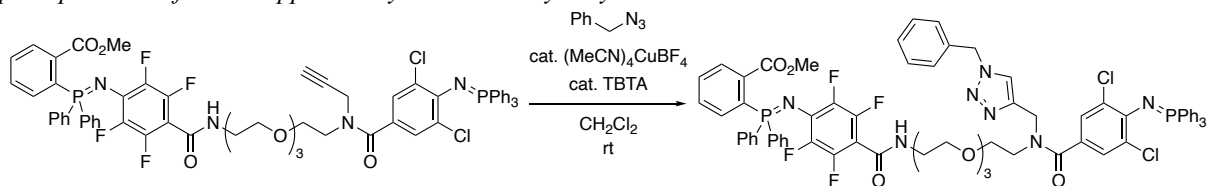

To a solution of methyl 2-(*N*-(4-((12-(3,5-dichloro-4-((triphenyl-15-phosphaneylidene)amino)benzoyl)-3,6,9-trioxa-12-azapentadec-14-yn-1-yl)carbamoyl)-2,3,5,6-tetrafluorophenyl)-*P,P*-diphenylphosphorimidoyl)benzoate (**17**) (34.0 mg, 29.0  $\mu$ mol, 1.0 equiv) in  $\text{CH}_2\text{Cl}_2$  (500  $\mu$ L) were added (azidomethyl)benzene (5.0 mg, 35  $\mu$ mol, 1.5 equiv),  $(\text{MeCN})_4\text{CuBF}_4$  (0.5 mg, 2  $\mu$ mol, 7 mol %), and tris[(1-benzyl-1*H*-1,2,3-triazol-4-yl)methyl]amine (TBTA) (0.8 mg, 2  $\mu$ mol, 7 mol %) at room temperature. After stirring for 24 h at the same temperature, to the mixture was added aqueous solution of  $\text{NH}_3$  (15 M, 4 mL). The mixture was extracted with  $\text{CH}_2\text{Cl}_2$  (10 mL  $\times$  4). The combined organic extract was washed with brine (5 mL) and dried with  $\text{Na}_2\text{SO}_4$ . After filtration, the filtrate was concentrated under reduced pressure. The residue was purified by preparative TLC ( $\text{CH}_2\text{Cl}_2/\text{MeOH} = 25/1$ ) to give methyl 2-(*N*-(4-((2-((1-benzyl-1*H*-1,2,3-triazol-4-yl)methyl)-1-(3,5-dichloro-4-((triphenyl- $\lambda^5$ -phosphaneylidene)amino)phenyl)-1-oxo-5,8,11-trioxa-2-azatridecan-13-yl)carbamoyl)-2,3,5,6-tetrafluorophenyl)-*P,P*-diphenylphosphorimidoyl)benzoate (**17**) (39.0 mg, <29.5  $\mu$ mol, quant.) as a colorless solid.

According to the procedure for preparing **17**, methyl 4-((2-((2-((6-chlorohexyl)oxy)ethoxy)ethyl)carbamoyl)-2-(*N*-(4-((1-(3,5-dichloro-4-(((11-oxo-2,3,6,7-tetrahydro-1*H*,5*H*,11*H*-pyrano[2,3-*f*]pyrido[3,2,1-*ij*]quinolin-9-yl)methyl)carbamoyl)phenyl)diphenyl- $\lambda^5$ -phosphaneylidene)amino)phenyl)-1-oxo-2-((1-(2-(2-(5-(2-oxohexahydro-1*H*-thieno[3,4-*d*]imidazol-4-yl)pentanamido)ethoxy)ethyl)-1*H*-1,2,3-triazol-4-yl)methyl)-5,8,11-trioxa-2-azatridecan-13-yl)carbamoyl)-2,3,5,6-tetrafluorophenyl)-*P,P*-diphenylphosphorimidoyl)benzoate (**23**) was prepared from the corresponding alkyne.

*One-pot synthesis of 17*

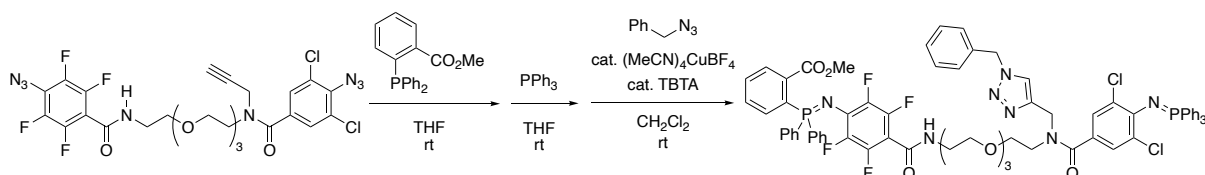

To a solution of 4-azido-*N*-(1-(4-azido-3,5-dichlorophenyl)-1-oxo-5,8,11-trioxa-2-azatridecan-13-yl)-2,3,5,6-tetrafluorobenzamide (**16**) (22.9 mg, 34.7  $\mu$ mol, 1.1 equiv) in THF (150  $\mu$ L) was added methyl 2-(diphenylphosphanyl)benzoate (**3b**) (10.0 mg, 31.2  $\mu$ mol, 1.0 equiv) in THF (150  $\mu$ L) at room temperature. After stirring for 4 h at the same temperature, to the mixture was added triphenylphosphine (**3a**) (9.9 mg, 38  $\mu$ mol, 1.2 equiv) at room temperature. After stirring for 4 h at the same temperature, to the mixture was added benzyl azide (5.0 mg, 38  $\mu$ mol, 1.2 equiv),  $(\text{MeCN})_4\text{CuBF}_4$  (0.5 mg, 2  $\mu$ mol, 6 mol %), and tris[(1-benzyl-1*H*-1,2,3-triazol-4-yl)methyl]amine (TBTA) (0.8 mg, 2  $\mu$ mol, 6 mol %) at room temperature. After stirring for 24 h at the same temperature, to the mixture was added aqueous solution of  $\text{NH}_3$  (15 M, 4 mL). The mixture was extracted with  $\text{EtOAc}$  (10 mL  $\times$  3). The combined organic extract was washed with brine (5 mL) and dried with  $\text{Na}_2\text{SO}_4$ . After filtration, the filtrate was concentrated under reduced pressure. The residue was purified by preparative TLC ( $\text{CH}_2\text{Cl}_2/\text{MeOH} = 25/1$ ) to give methyl 2-(*N*-(4-((2-((1-benzyl-1*H*-1,2,3-triazol-4-yl)methyl)-1-(3,5-dichloro-4-((triphenyl- $\lambda^5$ -phosphaneylidene)amino)phenyl)-1-oxo-5,8,11-trioxa-2-azatridecan-13-yl)carbamoyl)-2,3,5,6-tetrafluorophenyl)-*P,P*-diphenylphosphorimidoyl)benzoate (**17**) (38.9 mg, 29.4  $\mu$ mol, 94 %) as a colorless solid.

A procedure for the preparation of methyl 6-((4-(15-(4-azido-2,3,5,6-tetrafluorophenyl)-2-(4-azido-3,5-dichlorobenzoyl)-15-oxo-5,8,11-trioxa-2,14-diazapentadecyl)-1H-1,2,3-triazol-1-yl)methyl)nicotinate (**19**)

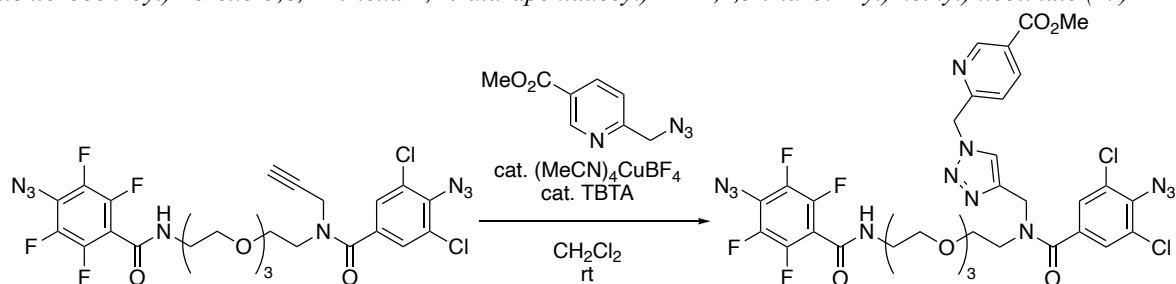

To a solution of 4-azido-*N*-(12-(4-azido-3,5-dichlorobenzoyl)-3,6,9-trioxa-12-azapentadec-14-yn-1-yl)-2,3,5,6-tetrafluorobenzamide (**16**) (13.2 mg, 20.0  $\mu\text{mol}$ , 1.0 equiv) in  $\text{CH}_2\text{Cl}_2$  (500  $\mu\text{L}$ ) were added methyl 6-(azidomethyl)nicotinate (**18**) (11.9 mg, 61.6  $\mu\text{mol}$ , 3.1 equiv),  $(\text{MeCN})_4\text{CuBF}_4$  (0.3 mg, 1  $\mu\text{mol}$ , 5 mol %), and TBTA (0.5 mg, 1  $\mu\text{mol}$ , 5 mol %) at room temperature. After stirring for 24 h at the same temperature, to the mixture was added aqueous solution of  $\text{NH}_3$  (15 M, 4 mL). The mixture was extracted with  $\text{CH}_2\text{Cl}_2$  (10 mL  $\times$  4). The combined organic extract was washed with brine (5 mL) and dried with  $\text{Na}_2\text{SO}_4$ . After filtration, the filtrate was concentrated under reduced pressure. The residue was purified by preparative TLC ( $\text{CH}_2\text{Cl}_2/\text{MeOH} = 25/1$ ) to give methyl 6-((4-(15-(4-azido-2,3,5,6-tetrafluorophenyl)-2-(4-azido-3,5-dichlorobenzoyl)-15-oxo-5,8,11-trioxa-2,14-diazapentadecyl)-1H-1,2,3-triazol-1-yl)methyl)nicotinate (**19**) (14.3 mg, 16.8  $\mu\text{mol}$ , 84%) as a colorless solid.

A typical procedure for the deprotection of *N*-Boc-protected amides

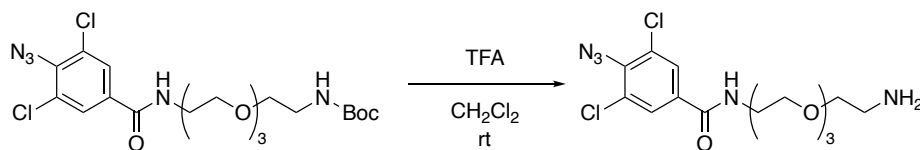

To a mixture of *N*-(2-(2-(2-(2-aminoethoxy)ethoxy)ethoxy)ethyl)-4-azido-3,5-dichlorobenzamide (24.2 mg, 51.0  $\mu\text{mol}$ ) in  $\text{CH}_2\text{Cl}_2$  (530  $\mu\text{L}$ ) was added trifluoroacetic acid (100  $\mu\text{L}$ , 1.30 mmol, 25 equiv) at 0  $^\circ\text{C}$ . After stirring for 2 h at room temperature, to the mixture was added an aqueous solution of  $\text{NaOH}$  (1 M, 20 mL). The mixture was extracted with  $\text{CH}_2\text{Cl}_2$  (15 mL  $\times$  3). The combined organic extract was washed with brine (10 mL) and dried with  $\text{Na}_2\text{SO}_4$ . After filtration, the filtrate was concentrated under reduced pressure to give *N*-(2-(2-(2-(2-aminoethoxy)ethoxy)ethoxy)ethyl)-4-azido-3,5-dichlorobenzamide as a colorless oil which was directly used in the next step without further purification.

According to the procedure for preparing *N*-(2-(2-(2-(2-aminoethoxy)ethoxy)ethoxy)ethyl)-4-azido-3,5-dichlorobenzamide, 4-azido-2,3,5,6-tetrafluoro-*N*-(3,6,9-trioxa-12-azapentadec-14-yn-1-yl)benzamide was prepared from the corresponding amide.

A typical procedure for the preparation of amines by reduction of azides

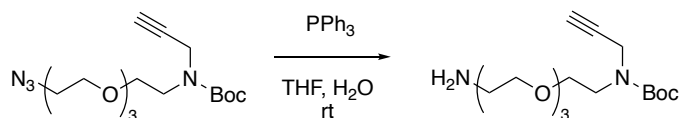

To a solution of *tert*-butyl (2-(2-(2-(2-azidoethoxy)ethoxy)ethoxy)ethyl)(prop-2-yn-1-yl)carbamate (**14**) (19.3 mg, 54.2  $\mu\text{mol}$ ) in THF (250  $\mu\text{L}$ ) and  $\text{H}_2\text{O}$  (25  $\mu\text{L}$ ) was added triphenylphosphine (14.8 mg, 56.4  $\mu\text{mol}$ , 1.0 equiv) at room temperature. After stirring for 3 days at the same temperature, to the mixture was added a saturated aqueous solution of  $\text{NH}_4\text{Cl}$  (4 mL). The mixture was washed with  $\text{EtOAc}$  (10 mL  $\times$  3). To the resulting aqueous solution was added a saturated aqueous solution of  $\text{NaHCO}_3$  (10 mL). The mixture was extracted with  $\text{EtOAc}$  (10 mL  $\times$  3). The combined organic extract was washed with brine (10 mL) and dried with  $\text{Na}_2\text{SO}_4$ . After filtration, the filtrate was concentrated under reduced pressure to give *tert*-butyl (2-(2-(2-(2-aminoethoxy)ethoxy)ethoxy)ethyl)(prop-2-yn-1-yl)carbamate as a colorless oil which was directly used in the next step without further purification.

According to the procedure for preparing 9-(aminomethyl)-2,3,6,7-tetrahydro-1*H*,5*H*,11*H*-pyrano[2,3-*f*]pyrido[3,2,1-*ij*]quinolin-11-one was prepared from the corresponding azide.

A typical procedure for the preparation of 4-azido-*N*-butyl-2,3,5,6-tetrafluorobenzamide (**2a**)

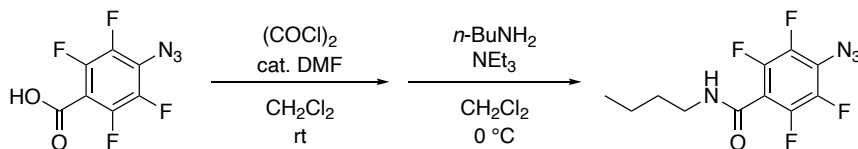

To a solution of 4-azido-2,3,5,6-tetrafluorobenzoic acid (237 mg, 1.01 mmol, 1.0 equiv) in  $\text{CH}_2\text{Cl}_2$  (3.0 mL) was added DMF (4.0  $\mu\text{L}$ , 52  $\mu\text{L}$ , 5 mol %) at 0 °C. After stirring for 5 min at the same temperature, to the mixture was added oxalyl chloride (113  $\mu\text{L}$ , 1.32 mmol, 1.3 equiv) at the same temperature. After stirring the mixture for 12 h at room temperature. The mixture was concentrated under reduced pressure to give 4-azido-2,3,5,6-tetrafluorobenzoyl chloride (**2b**) as brown oil which was directly used in the next step without further purification.

To an aliquot of the mixture containing 4-azido-2,3,5,6-tetrafluorobenzoyl chloride (**2b**) (24.8 mg, 0.100 mmol, 1.0 equiv) in  $\text{CH}_2\text{Cl}_2$  (188  $\mu\text{L}$ ) were successively added triethylamine (33.0  $\mu\text{L}$ , 0.235 mmol, 2.4 equiv) and *n*-butylamine (9.8  $\mu\text{L}$ , 0.10 mmol, 1.0 equiv) at 0 °C. After stirring for 2 h at the same temperature, the mixture was concentrated under reduced pressure. After the addition of  $\text{H}_2\text{O}$  (10 mL), the mixture was extracted with  $\text{CH}_2\text{Cl}_2$  (10 mL  $\times$  3). The combined organic extract was washed with brine (10 mL) and dried with  $\text{Na}_2\text{SO}_4$ . After filtration, the filtrate was concentrated under reduced pressure. The residue was purified by preparative TLC (*n*-hexane/EtOAc = 1/1) to give 4-azido-*N*-butyl-2,3,5,6-tetrafluorobenzamide (**2a**) (28.4 mg, 97.9  $\mu\text{mol}$ , 98%) as a pale yellow solid.

According to the procedure for preparing 4-azido-*N*-butyl-2,3,5,6-tetrafluorobenzamide (**2a**), 4-azido-*N*-butyl-3,5-dichlorobenzamide (**1a**), *N*-(2-(2-(2-(2-aminoethoxy)ethoxy)ethoxy)ethyl)-4-azido-3,5-dichlorobenzamide (**8**), 4-azido-*N*-(1-(4-azido-3,5-dichlorophenyl)-1-oxo-5,8,11-trioxa-2-azatridecan-13-yl)-2,3,5,6-tetrafluorobenzamide (**9**), *tert*-butyl (1-(4-azido-2,3,5,6-tetrafluorophenyl)-1-oxo-5,8,11-trioxa-2-azatridecan-13-yl)(prop-2-yn-1-yl)carbamate (**15**), and 4-azido-*N*-(12-(4-azido-3,5-dichlorobenzoyl)-3,6,9-trioxa-12-azapentadec-14-yn-1-yl)-2,3,5,6-tetrafluorobenzamide (**16**) were prepared from the corresponding amines.

A typical procedure for the preparation of methyl 2-(diphenylphosphanyl)-5-methoxybenzoate

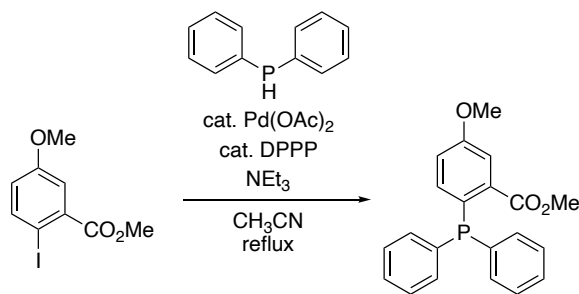

To a solution of methyl 2-iodo-5-methoxybenzoate (400 mg, 1.37 mmol, 1.0 equiv) in  $\text{CH}_3\text{CN}$  (2.0 mL) were added palladium(II) acetate (5.1 mg, 23  $\mu\text{mol}$ , 17 mol %), 1,3-bis(diphenylphosphino)propane (DPPP) (6.8 mg, 17  $\mu\text{mol}$ , 12 mol %), and triethylamine (200  $\mu\text{L}$ , 1.44 mmol, 1.1 equiv) at room temperature. To the mixture was added diphenylphosphine (242  $\mu\text{L}$ , 1.39 mmol, 1.0 equiv) at the same temperature. After stirring at reflux (oil bath; bath temp 80 °C) for 4 h, the reaction mixture was cooled to room temperature and concentrated in vacuo. The residue was purified by silica gel column chromatography (silica-gel 26 g, *n*-hexane/EtOAc = 4/1) to give methyl 2-(diphenylphosphanyl)-5-methoxybenzoate (**3i**) (341 mg, 0.973 mmol, 71%) as a yellow solid.

*A typical procedure for the preparation of phosphanyl amides*

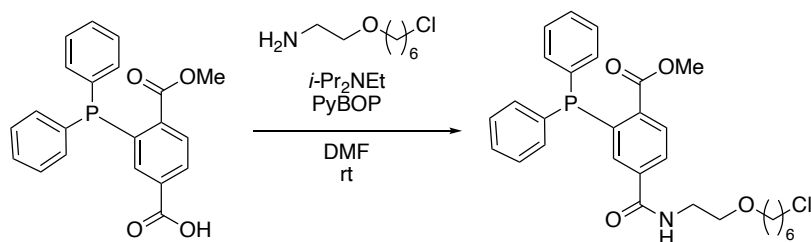

To a solution of 3-(diphenylphosphanyl)-4-(methoxycarbonyl)benzoic acid (714 mg, 1.96 mmol) in DMF (7.0 mL) were added 1-(2-aminoethoxy)-6-chlorohexane (672 mg, 3.00 mmol, 1.5 equiv), *N,N*-diisopropylethylamine (830  $\mu$ L, 4.80 mmol, 2.4 equiv), and benzotriazol-1-yloxy(tripyrrolidin-1-yl)phosphonium hexafluorophosphate (PyBOP) (1.21 g, 2.33 mmol, 1.2 equiv) at 0 °C. After stirring for 16 h at room temperature, to the mixture was added an aqueous saturated solution of sodium bicarbonate (30 mL). The mixture was extracted with EtOAc (20 mL  $\times$  3). The combined organic extract was washed with brine (20 mL) and dried with Na<sub>2</sub>SO<sub>4</sub>. After filtration, the filtrate was concentrated under reduced pressure. The residue was purified by silica gel column chromatography (silica-gel 75 g, *n*-hexane/EtOAc = 1/2) to give methyl 4-((2-((6-chlorohexyl)oxy)ethyl)carbamoyl)-2-(diphenylphosphanyl)benzoate (**20**) (838 mg, 1.60 mmol, 82%) as a yellow oil.

According to the procedure for preparing methyl 4-((2-((6-chlorohexyl)oxy)ethyl)carbamoyl)-2-(diphenylphosphanyl)benzoate (**20**), 4-(diphenylphosphanyl)-*N*-((11-oxo-2,3,6,7-tetrahydro-1*H*,5*H*,11*H*-pyrano[2,3-*f*]pyrido[3,2,1-*ij*]quinolin-9-yl)methyl)benzamide (**21**) was prepared from the corresponding carboxylic acid.



### Preliminary studies for the selective azylide formations

A competition experiment between 4-azido-*N*-butyl-3,5-dichlorobenzamide (**1a**), 4-azido-*N*-butyl-2,3,5,6-tetrafluorobenzamide (**2a**), and benzyl azide with triphenylphosphine (**3a**)

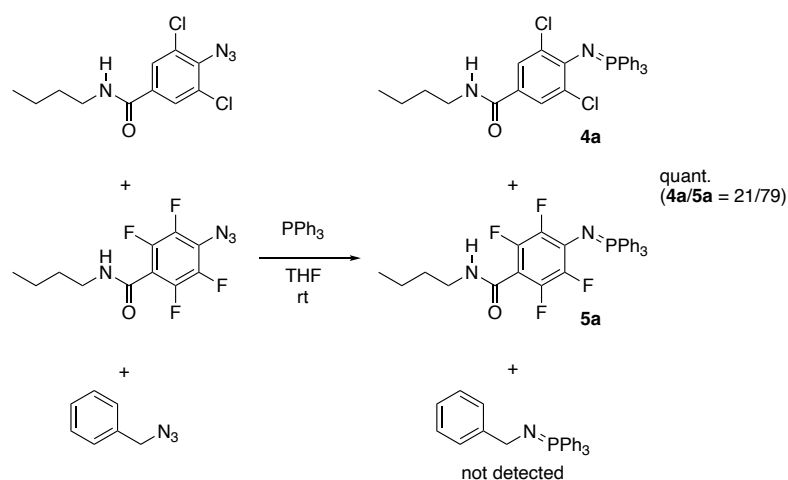

To a mixture of 4-azido-*N*-butyl-3,5-dichlorobenzamide (**1a**) (14.2 mg, 49.5  $\mu\text{mol}$ , 1.1 equiv), 4-azido-*N*-butyl-2,3,5,6-tetrafluorobenzamide (**2a**) (14.4 mg, 49.6  $\mu\text{mol}$ , 1.1 equiv), and (azidomethyl)benzene (6.8 mg, 51  $\mu\text{mol}$ , 1.1 equiv), dissolved in THF (250  $\mu\text{L}$ ) was added a solution of triphenylphosphine (**3a**) (11.9 mg, 45.3  $\mu\text{mol}$ , 1.0 equiv) dissolved in THF (250  $\mu\text{L}$ ) at room temperature. After stirring for 4 h at the same temperature, the mixture was concentrated in vacuo. To the mixture was added hexamethylphosphoric triamide (HMPA) (5.8 mg, 32  $\mu\text{mol}$ ) as an internal standard. The yields of **4a** and **5a** were determined by  $^{31}\text{P}$  NMR analysis (162 MHz) to be quant. (**4a**/**5a** = 21/79), respectively, by comparing the relative values of integration for the peaks observed at 2.3 ppm (for **4a**) and 10.2 ppm (for **5a**) with that of HMPA observed at 25.6 ppm.

A competition experiment between 4-azido-*N*-butyl-3,5-dichlorobenzamide (**1a**), 4-azido-*N*-butyl-2,3,5,6-tetrafluorobenzamide (**2a**), and (azidomethyl)benzene with methyl 2-(diphenylphosphaneyl)benzoate (**3b**)

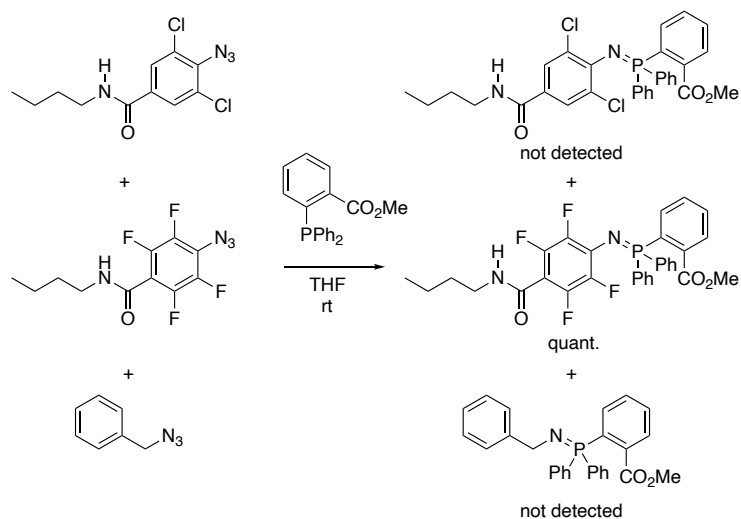

To a mixture of 4-azido-*N*-butyl-3,5-dichlorobenzamide (**1a**) (14.2 mg, 49.5  $\mu\text{mol}$ , 1.1 equiv), 4-azido-*N*-butyl-2,3,5,6-tetrafluorobenzamide (**2a**) (14.4 mg, 49.6  $\mu\text{mol}$ , 1.1 equiv), and benzyl azide (6.5 mg, 49  $\mu\text{mol}$ , 1.1 equiv), dissolved in THF (250  $\mu\text{L}$ ) was added a solution of methyl 2-(diphenylphosphaneyl)benzoate (**3b**) (14.4 mg, 45.0  $\mu\text{mol}$ , 1.0 equiv) dissolved in THF (250  $\mu\text{L}$ ) at room temperature. After stirring for 4 h at the same temperature, the mixture was concentrated in vacuo. To the mixture was added hexamethylphosphoric triamide (HMPA) (4.6 mg, 25.7  $\mu\text{mol}$ ) as an internal standard. The yield of **5b** was determined by  $^{31}\text{P}$  NMR analysis (162 MHz) to be quant. by comparing the relative values of integration for the peaks observed at 11.3 ppm (for **5b**) with that of HMPA observed at 25.6 ppm.

## Characterization Data of New Compounds

Methyl 2-(diphenylphosphaneyl)benzoate (**3c**),<sup>S11</sup> diphenyl(*o*-tolyl)phosphane (**3d**),<sup>S11</sup> (2-fluorophenyl)diphenylphosphane (**3e**),<sup>S12</sup> (2-chlorophenyl)diphenylphosphane (**3f**),<sup>S13</sup> (2-bromophenyl)diphenylphosphane (**3g**),<sup>S11</sup> methyl 4-(diphenylphosphaneyl)benzoate (**3h**),<sup>S13</sup> triphenylphosphine oxide (**6a**),<sup>S14</sup> methyl 2-(diphenylphosphoryl)benzoate (**6b**),<sup>S15</sup> and 9-(aminomethyl)-2,3,6,7-tetrahydro-1*H*,5*H*,11*H*-pyrano[2,3-*f*]pyrido[3,2,1-*ij*]quinolin-11-one<sup>S16</sup> were identical in spectra data with those reported in the literature.

### 4-Azido-*N*-butyl-3,5-dichlorobenzamide (**1a**)

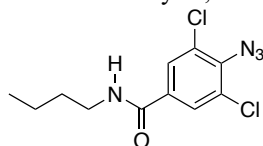

Yellow solid; TLC  $R_f$  0.48 (*n*-hexane/EtAOc = 4/1); Mp 105–107 °C; <sup>1</sup>H NMR (CDCl<sub>3</sub>, 400 MHz): δ 0.95 (t, 3H,  $J = 7.3$  Hz), 1.34–1.45 (m, 2H), 1.54–1.63 (m, 2H), 3.43 (td, 2H,  $J = 5.7, 5.7$  Hz), 6.13–6.22 (br, 1H), 7.67 (s, 2H); <sup>13</sup>C{<sup>1</sup>H} NMR (CDCl<sub>3</sub>, 101 MHz): δ 13.7, 20.1, 31.5, 40.1, 127.7, 129.3, 132.7, 136.5, 164.2; IR (NaCl, cm<sup>-1</sup>) 1455, 1538, 1548, 1634, 2123; HRMS (ESI)  $m/z$ : [M + H]<sup>+</sup> Calcd for C<sub>11</sub>H<sub>13</sub><sup>35</sup>Cl<sub>2</sub>N<sub>4</sub>O<sup>+</sup> 287.0461; Found 287.0461.

### 4-Azido-*N*-butyl-2,3,5,6-tetrafluorobenzamide (**2a**)

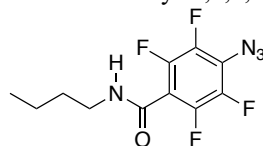

Pale yellow solid; TLC  $R_f$  0.47 (*n*-hexane/EtAOc = 4/1); Mp 152–155 °C; <sup>1</sup>H NMR (CDCl<sub>3</sub>, 400 MHz): δ 0.95 (t, 3H,  $J = 7.4$  Hz), 1.35–1.46 (m, 2H), 1.54–1.64 (m, 2H), 3.45 (td, 2H,  $J = 6.0, 6.0$  Hz), 5.91–6.05 (br, 1H); <sup>13</sup>C{<sup>1</sup>H} NMR (CDCl<sub>3</sub>, 101 MHz): δ 13.6, 19.9, 31.2, 40.0, 111.6, 121.7, 138.9–141.8 (m), 142.5–145.5 (m), 157.6; <sup>19</sup>F{<sup>1</sup>H} NMR (CDCl<sub>3</sub>, 377 MHz): δ -150.7–-150.4 (2F, m), -141.0–-140.9 (2F, m); IR (NaCl, cm<sup>-1</sup>) 992, 1020, 1276, 1488, 1557, 1646, 1651, 2935, 2962, 3288; HRMS (ESI)  $m/z$ : [M + Na]<sup>+</sup> Calcd for C<sub>11</sub>H<sub>10</sub>F<sub>4</sub>N<sub>4</sub>NaO<sup>+</sup> 313.0688; Found 313.0688.

### Methyl 2-(diphenylphosphaneyl)-5-methoxybenzoate (**3i**)

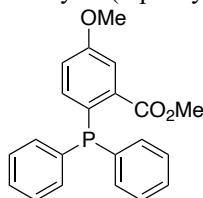

Colorless solid; TLC  $R_f$  0.40 (*n*-hexane/ EtAOc = 10/1); Mp 138–140 °C; <sup>1</sup>H NMR (CDCl<sub>3</sub>, 400 MHz): δ 3.77 (s, 3H), 3.84 (s, 3H), 6.82–6.88 (m, 1H), 6.91–6.96 (m, 1H), 7.23–7.36 (m, 10H), 7.57–7.62 (m, 1H); <sup>13</sup>C{<sup>1</sup>H} NMR (CDCl<sub>3</sub>, 101 MHz): δ 52.1, 55.4, 115.6 (d,  $J = 3.4$  Hz), 118.0, 128.4 (d,  $J = 7.1$  Hz), 128.4, 130.8 (d,  $J = 23.3$  Hz), 133.6 (d,  $J = 20.5$  Hz), 135.6, 135.8, 138.2 (d,  $J = 11.3$  Hz), 159.5, 167.0 (d,  $J = 1.9$  Hz); <sup>31</sup>P NMR (CDCl<sub>3</sub>, 162 MHz): δ -6.7 (m); IR (NaCl, cm<sup>-1</sup>) 1060, 1225, 1252, 1291, 1434, 1478, 1597, 1717, 1721; HRMS (ESI)  $m/z$ : [M + Na]<sup>+</sup> Calcd for C<sub>21</sub>H<sub>19</sub>O<sub>3</sub>NaP<sup>+</sup> 373.0970; Found 373.0969.

### *N*-Butyl-3,5-dichloro-4-((triphenyl-λ<sup>5</sup>-phosphanylidene)amino)benzamide (**4a**)

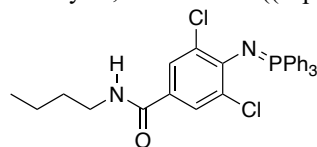

Colorless solid; TLC  $R_f$  0.38 (*n*-hexane/EtAOc = 2/1); Mp 188–190 °C; <sup>1</sup>H NMR (CDCl<sub>3</sub>, 400 MHz): δ 0.93 (t, 3H,  $J = 7.3$  Hz), 1.32–1.44 (m, 2H), 1.50–1.60 (m, 2H), 3.38 (td, 2H,  $J = 5.8, 5.8$  Hz), 5.91 (t, 1H,  $J = 5.2$  Hz), 7.39–7.46 (m, 6H), 7.48–7.54 (m, 3H), 7.57 (d, 2H,  $J = 1.3$  Hz), 7.70–7.78 (m, 6H); <sup>13</sup>C{<sup>1</sup>H} NMR (CDCl<sub>3</sub>, 101 MHz): δ 13.8, 20.1, 31.7, 39.7, 124.7, 126.5 (d,  $J = 1.3$  Hz), 128.3 (d,  $J = 12.7$  Hz), 131.1 (d,  $J = 9.1$  Hz), 131.6 (d,  $J = 2.8$  Hz), 131.8 (d,  $J = 105$  Hz), 132.5 (d,  $J = 10.1$  Hz), 147.9, 165.7; <sup>31</sup>P NMR (CDCl<sub>3</sub>, 162 MHz): δ 2.1

(m); IR (NaCl,  $\text{cm}^{-1}$ ) 1116, 1435, 1464, 1471, 1481, 1484, 3260; HRMS (ESI)  $m/z$ :  $[\text{M} + \text{H}]^+$  Calcd for  $\text{C}_{29}\text{H}_{28}^{35}\text{Cl}_2\text{N}_2\text{OP}^+$  521.1311; Found 521.1310.

*N*-Butyl-3,5-dichloro-4-(((2-methoxyphenyl)diphenyl- $\lambda^5$ -phosphaneylidene)amino)benzamide (**4c**)

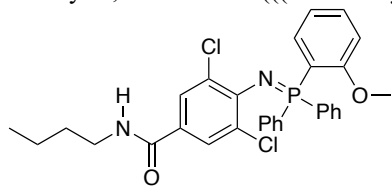

Colorless solid; TLC  $R_f$  0.28 (*n*-hexane/EtAOc = 2/1); Mp 220–222 °C;  $^1\text{H}$  NMR ( $\text{CDCl}_3$ , 400 MHz):  $\delta$  0.94 (t, 3H,  $J = 7.3$  Hz), 1.33–1.44 (m, 2H), 1.50–1.59 (m, 2H), 3.26 (s, 3H), 3.38 (td, 2H,  $J = 5.8, 5.8$  Hz), 5.85–5.91 (br, 1H), 6.77–6.83 (m, 1H), 6.94–7.01 (m, 1H), 7.31–7.38 (m, 1H), 7.39–7.45 (m, 4H), 7.46–7.53 (m, 3H), 7.54 (d, 2H,  $J = 1.4$  Hz), 7.77–7.84 (m, 4H);  $^{13}\text{C}\{^1\text{H}\}$  NMR ( $\text{CDCl}_3$ , 101 MHz):  $\delta$  13.8, 20.1, 31.7, 39.7, 54.8, 110.9 (d,  $J = 6.3$  Hz), 119.0 (d,  $J = 53.4$  Hz), 120.8 (d,  $J = 11.3$  Hz), 124.3 (d,  $J = 3.5$  Hz), 126.2 (d,  $J = 2.5$  Hz), 128.0 (d,  $J = 12.9$  Hz), 131.3 (d,  $J = 2.8$  Hz), 131.5 (d,  $J = 13.8$  Hz), 132.1 (d,  $J = 119$  Hz), 132.5 (d,  $J = 10.5$  Hz), 134.0 (d,  $J = 2.0$  Hz), 134.6 (d,  $J = 7.3$  Hz), 149.3, 161.0 (d,  $J = 3.3$  Hz), 165.7;  $^{31}\text{P}$  NMR ( $\text{CDCl}_3$ , 162 MHz):  $\delta$  3.3 (m); IR (NaCl,  $\text{cm}^{-1}$ ) 1435, 1464, 1471, 1475, 1481, 1485, 1494; HRMS (ESI)  $m/z$ :  $[\text{M} + \text{H}]^+$  Calcd for  $\text{C}_{30}\text{H}_{30}^{35}\text{Cl}_2\text{N}_2\text{O}_2\text{P}^+$  551.1416; Found 551.1417.

*N*-Butyl-3,5-dichloro-4-(((diphenyl(*o*-tolyl)- $\lambda^5$ -phosphaneylidene)amino)benzamide (**4d**)

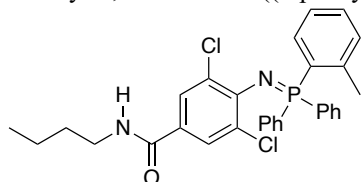

Pale yellow solid; TLC  $R_f$  0.45 (*n*-hexane/EtAOc = 2/1); Mp 206–208 °C;  $^1\text{H}$  NMR ( $\text{CDCl}_3$ , 400 MHz):  $\delta$  0.93 (t, 3H,  $J = 7.3$  Hz), 1.32–1.43 (m, 2H), 1.50–1.59 (m, 2H), 2.17 (s, 3H), 3.37 (td, 2H,  $J = 1.2, 1.2$  Hz), 5.98 (t, 1H,  $J = 5.4$  Hz), 7.12–7.27 (m, 3H), 7.37–7.47 (m, 5H), 7.49–7.55 (m, 2H), 7.58 (d, 2H,  $J = 1.3$  Hz), 7.75–7.84 (m, 4H);  $^{13}\text{C}\{^1\text{H}\}$  NMR ( $\text{CDCl}_3$ , 101 MHz):  $\delta$  13.8, 20.1, 21.4 (d,  $J = 4.6$  Hz), 31.7, 39.7, 124.1 (d,  $J = 2.0$  Hz), 125.3 (d,  $J = 12.3$  Hz), 126.6, 128.4 (d,  $J = 12.7$  Hz), 130.4 (d,  $J = 9.1$  Hz), 130.7 (d,  $J = 88.1$  Hz), 131.5 (d,  $J = 2.8$  Hz), 131.8, 131.8 (d,  $J = 13.6$  Hz), 132.0 (d,  $J = 112$  Hz), 132.4 (d,  $J = 10.2$  Hz), 133.3 (d,  $J = 12.2$  Hz), 142.8, 147.9, 165.7;  $^{31}\text{P}$  NMR ( $\text{CDCl}_3$ , 162 MHz):  $\delta$  3.0 (m); IR (NaCl,  $\text{cm}^{-1}$ ) 1435, 1464, 1471, 1481, 1487, 1494, 1505; HRMS (ESI)  $m/z$ :  $[\text{M} + \text{H}]^+$  Calcd for  $\text{C}_{30}\text{H}_{30}^{35}\text{Cl}_2\text{N}_2\text{OP}^+$  535.1467; Found 535.1464.

*N*-Butyl-3,5-dichloro-4-(((2-fluorophenyl)diphenyl- $\lambda^5$ -phosphaneylidene)amino)benzamide (**4e**)

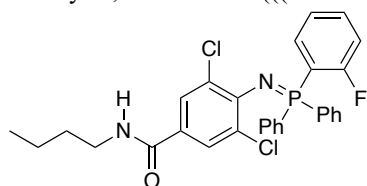

Colorless solid; TLC  $R_f$  0.41 (*n*-hexane/EtAOc = 2/1); Mp 185–187 °C;  $^1\text{H}$  NMR ( $\text{CDCl}_3$ , 400 MHz):  $\delta$  0.93 (t, 3H,  $J = 7.3$  Hz), 1.32–1.43 (m, 2H), 1.50–1.59 (m, 2H), 3.37 (td, 2H,  $J = 5.6, 5.6$  Hz), 5.90 (t, 1H,  $J = 5.6$  Hz), 7.01–7.08 (m, 1H), 7.25–7.31 (m, 1H), 7.40–7.47 (m, 4H), 7.49–7.58 (m, 5H), 7.76–7.84 (m, 4H), 7.95–8.04 (m, 1H);  $^{13}\text{C}\{^1\text{H}\}$  NMR ( $\text{CDCl}_3$ , 101 MHz):  $\delta$  13.8, 20.1, 31.7, 39.7, 116.0 (d,  $J = 5.9$  Hz), 116.2, 124.4 (d,  $J = 10.4$  Hz), 125.0, 126.4, 128.3 (d,  $J = 13.0$  Hz), 131.0 (d,  $J = 109$  Hz), 131.1 (d,  $J = 9.1$  Hz), 131.8 (d,  $J = 3.0$  Hz), 132.2 (d,  $J = 10.8$  Hz), 134.5 (d,  $J = 10.6$  Hz), 135.2 (d,  $J = 5.0$  Hz), 147.7, 162.8 (d,  $J = 251$  Hz), 165.7;  $^{19}\text{F}\{^1\text{H}\}$  NMR ( $\text{CDCl}_3$ , 377 MHz):  $\delta$  -99.1 (d,  $J = 6.2$  Hz);  $^{31}\text{P}$  NMR ( $\text{CDCl}_3$ , 162 MHz):  $\delta$  -2.0 (m); IR (NaCl,  $\text{cm}^{-1}$ ) 1438, 1455, 1471, 1480, 1484, 1494; HRMS (ESI)  $m/z$ :  $[\text{M} + \text{H}]^+$  Calcd for  $\text{C}_{29}\text{H}_{27}^{35}\text{Cl}_2\text{FN}_2\text{OP}^+$  539.1217; Found 539.1217.

Methyl 4-(*N*-(4-(butylcarbamoyl)-2,6-dichlorophenyl)-*P,P*-diphenylphosphorimidoyl)benzoate (**4h**)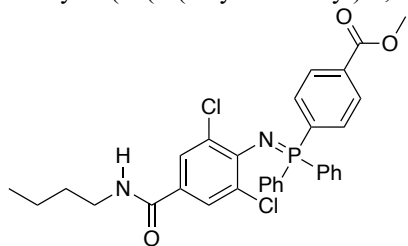

Colorless solid; TLC  $R_f$  0.31 (*n*-hexane/EtAOc = 2/1); Mp 67–69 °C;  $^1\text{H}$  NMR ( $\text{CDCl}_3$ , 400 MHz):  $\delta$  0.92 (t, 3H,  $J = 7.3$  Hz), 1.37–1.42 (m, 2H), 1.50–1.59 (m, 2H), 3.37 (td, 2H,  $J = 5.6, 5.6$  Hz), 3.92 (s, 3H), 5.98 (t, 1H,  $J = 5.6$  Hz), 7.40–7.47 (m, 4H), 7.50–7.55 (m, 2H), 7.57 (d, 2H,  $J = 1.3$  Hz), 7.68–7.76 (m, 4H), 7.80–7.88 (m, 2H), 8.05–8.10 (m, 2H);  $^{13}\text{C}\{^1\text{H}\}$  NMR ( $\text{CDCl}_3$ , 101 MHz):  $\delta$  13.7, 20.1, 31.7, 39.7, 52.4, 125.0 (d,  $J = 2.6$  Hz), 126.5, 128.5 (d,  $J = 12.7$  Hz), 129.2 (d,  $J = 12.6$  Hz), 131.0 (d,  $J = 105$  Hz), 131.0 (d,  $J = 9.1$  Hz), 131.9 (d,  $J = 2.8$  Hz), 132.5 (d,  $J = 10.2$  Hz), 132.7 (d,  $J = 3.1$  Hz), 136.8, 137.8, 147.4, 165.6, 166.3;  $^{31}\text{P}$  NMR ( $\text{CDCl}_3$ , 162 MHz)  $\delta$  –1.1 (m); IR (NaCl,  $\text{cm}^{-1}$ ) 1286, 1435, 1464, 1471, 1481, 1487, 1494, 1504, 1727; HRMS (ESI)  $m/z$ :  $[\text{M} + \text{Na}]^+$  Calcd for  $\text{C}_{31}\text{H}_{29}^{35}\text{Cl}_2\text{N}_2\text{NaO}_3\text{P}^+$  601.1191; Found 601.1194.

*N*-Butyl-2,3,5,6-tetrafluoro-4-((triphenyl- $\lambda^5$ -phosphanylidene)amino)benzamide (**5a**)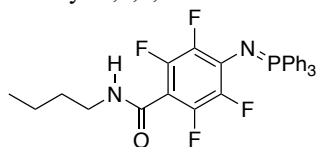

Colorless solid; TLC  $R_f$  0.44 (*n*-hexane/EtAOc = 2/1); Mp 176–178 °C;  $^1\text{H}$  NMR ( $\text{CDCl}_3$ , 400 MHz):  $\delta$  0.92 (t, 3H,  $J = 7.3$  Hz), 1.31–1.42 (m, 2H), 1.49–1.58 (m, 2H), 3.39 (td, 2H,  $J = 5.9, 5.9$  Hz), 5.92–6.01 (br, 1H), 7.43–7.50 (m, 6H), 7.51–7.58 (m, 3H), 7.68–7.76 (m, 6H);  $^{13}\text{C}\{^1\text{H}\}$  NMR ( $\text{CDCl}_3$ , 101 MHz):  $\delta$  13.6, 19.9, 31.4, 39.6, 102.2, 128.6 (d,  $J = 12.4$  Hz), 130.5 (d,  $J = 104$  Hz), 132.0 (d,  $J = 2.8$  Hz), 132.3 (d,  $J = 10.2$  Hz), 132.7–133.3 (m), 141.0–143.9 (m), 143.3–146.4 (m), 160.0;  $^{19}\text{F}\{^1\text{H}\}$  NMR ( $\text{CDCl}_3$ , 377 MHz):  $\delta$  –152.5– –152.1 (2F, m), –146.2– –145.9 (2F, m);  $^{31}\text{P}$  NMR ( $\text{CDCl}_3$ , 162 MHz):  $\delta$  10.2 (m); IR (NaCl,  $\text{cm}^{-1}$ ) 979, 1110, 1205, 1265, 1288, 1435, 1505, 1515, 1646; HRMS (ESI)  $m/z$ :  $[\text{M} + \text{Na}]^+$  Calcd for  $\text{C}_{29}\text{H}_{25}\text{F}_4\text{N}_2\text{NaOP}^+$  547.1538; Found 547.1533.

Methyl 2-(*N*-(4-(butylcarbamoyl)-2,3,5,6-tetrafluorophenyl)-*P,P*-diphenylphosphorimidoyl)benzoate (**5b**)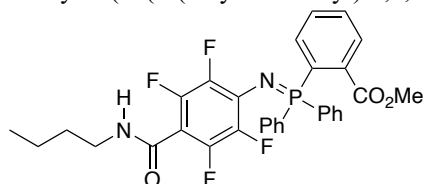

Colorless solid; TLC  $R_f$  0.23 (*n*-hexane/EtAOc = 2/1); Mp 132–134 °C;  $^1\text{H}$  NMR ( $\text{CDCl}_3$ , 400 MHz):  $\delta$  0.92 (t, 3H,  $J = 7.3$  Hz), 1.32–1.43 (m, 2H), 1.49–1.59 (m, 2H), 3.28(s, 3H), 3.39 (td, 2H,  $J = 6.2, 6.2$  Hz), 5.91–6.01 (br, 1H), 7.43–7.57 (m, 8H), 7.60–7.66 (m, 1H), 7.69–7.77 (m, 4H), 7.86–7.91 (m, 1H);  $^{13}\text{C}\{^1\text{H}\}$  NMR ( $\text{CDCl}_3$ , 101 MHz):  $\delta$  13.7, 19.9, 31.4, 39.6, 52.0, 102.3, 128.6 (d,  $J = 13.0$  Hz), 130.7 (d,  $J = 88.9$  Hz), 130.7 (d,  $J = 7.8$  Hz), 131.2 (d,  $J = 11.9$  Hz), 131.3 (d,  $J = 110$  Hz), 131.6–131.9 (m, two signals overlapped), 132.0 (d,  $J = 2.4$  Hz), 133.1–133.5 (m), 135.0 (d,  $J = 10.9$  Hz), 135.6 (d,  $J = 6.2$  Hz), 141.0–143.8 (m), 143.4–146.3 (m), 160.0, 167.2 (d,  $J = 2.6$  Hz);  $^{19}\text{F}\{^1\text{H}\}$  NMR ( $\text{CDCl}_3$ , 377 MHz):  $\delta$  –152.6– –152.3 (2F, m), –146.4– –146.1 (2F, m);  $^{31}\text{P}$  NMR ( $\text{CDCl}_3$ , 162 MHz):  $\delta$  11.3 (m); IR (NaCl,  $\text{cm}^{-1}$ ) 1282, 1438, 1481, 1484, 1505, 1511, 1515, 1520, 1644, 1651, 1728; HRMS (ESI)  $m/z$ :  $[\text{M} + \text{Na}]^+$  Calcd for  $\text{C}_{31}\text{H}_{27}\text{F}_4\text{N}_2\text{NaO}_3\text{P}^+$  605.1593; Found 605.1597.

*N*-Butyl-2,3,5,6-tetrafluoro-4-(((2-methoxyphenyl)diphenyl- $\lambda^5$ -phosphanylidene)amino)benzamide (**5c**)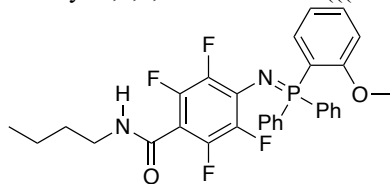

Colorless solid; TLC  $R_f$  0.31 (*n*-hexane/EtAOc = 2/1); Mp 209–211 °C;  $^1\text{H}$  NMR ( $\text{CDCl}_3$ , 400 MHz):  $\delta$  0.91 (t, 3H,  $J = 7.3$  Hz), 1.30–1.41 (m, 2H), 1.47–1.57 (m, 2H), 3.36 (td, 2H,  $J = 6.0, 6.0$  Hz), 3.42 (s, 3H), 6.02–6.10 (br, 1H), 6.84–6.91 (m, 1H), 7.04–7.11 (m, 1H), 7.38–7.47 (m, 4H), 7.47–7.56 (m, 3H), 7.69–7.80 (m, 5H);  $^{13}\text{C}\{^1\text{H}\}$  NMR ( $\text{CDCl}_3$ , 101 MHz):  $\delta$  13.6, 19.2, 31.4, 39.6, 55.0, 101.9 (t,  $J = 15.9$  Hz), 111.4 (d,  $J = 6.8$  Hz), 118.4 (d,  $J$

= 99.5 Hz), 121.1 (d,  $J = 11.6$  Hz), 128.2 (d,  $J = 13.0$  Hz), 130.8 (d,  $J = 109$  Hz), 131.6 (d,  $J = 2.9$  Hz), 132.0 (d,  $J = 10.6$  Hz), 133.6–134.1 (m), 134.3 (d,  $J = 1.7$  Hz), 134.9 (d,  $J = 6.7$  Hz), 141.2–144.0 (m), 143.5–146.3 (m), 160.1, 161.5 (d,  $J = 3.8$  Hz);  $^{19}\text{F}\{^1\text{H}\}$  NMR ( $\text{CDCl}_3$ , 377 MHz):  $\delta$  -152.7–-152.4 (2F, m), -146.8–-146.5 (2F, m);  $^{31}\text{P}$  NMR ( $\text{CDCl}_3$ , 162 MHz):  $\delta$  10.1 (m); IR ( $\text{NaCl}$ ,  $\text{cm}^{-1}$ ) 1199, 1275, 1435, 1477, 1505, 1511, 1514, 1634, 1640; HRMS (ESI)  $m/z$ :  $[\text{M} + \text{Na}]^+$  Calcd for  $\text{C}_{30}\text{H}_{27}\text{F}_4\text{N}_2 \text{Na O}_2\text{P}^+$  577.1644; Found 577.1640.

*N*-Butyl-4-((diphenyl(*o*-tolyl)- $\lambda^5$ -phosphanylidene)amino)-2,3,5,6-tetrafluorobenzamide (**5d**)

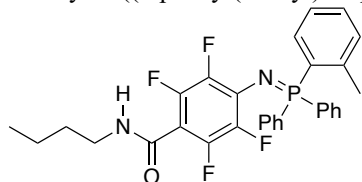

Colorless solid; TLC  $R_f$  0.47 (*n*-hexane/EtAOc = 2/1); Mp 216–218 °C;  $^1\text{H}$  NMR ( $\text{CDCl}_3$ , 400 MHz):  $\delta$  0.92 (t, 3H,  $J = 7.4$  Hz), 1.32–1.43 (m, 2H), 1.50–1.59 (m, 2H), 2.17(s, 3H), 3.40 (td, 2H,  $J = 6.0$  Hz, 6.0 Hz), 5.95–6.03 (br, 1H), 7.17–7.34 (m, 3H), 7.40–7.51 (m, 5H), 7.51–7.58 (m, 2H), 7.68–7.77 (m, 4H);  $^{13}\text{C}\{^1\text{H}\}$  NMR ( $\text{CDCl}_3$ , 101 MHz):  $\delta$  13.7, 20.0, 21.3 (d,  $J = 4.4$  Hz), 31.4, 39.6, 101.7 (t,  $J = 16.5$  Hz), 125.5 (d,  $J = 12.6$  Hz), 128.7 (d,  $J = 12.8$  Hz), 128.7 (d,  $J = 90.4$  Hz), 131.0 (d,  $J = 109$  Hz), 131.9 (d,  $J = 2.8$  Hz), 132.0 (d,  $J = 10.1$  Hz), 132.1 (d,  $J = 10.7$  Hz), 132.3 (d,  $J = 2.5$  Hz), 133.2–133.5 (m), 133.8 (d,  $J = 12.5$  Hz), 140.9–144.1 (m), 142.7 (d,  $J = 8.7$  Hz), 143.2–146.5 (m), 160.1;  $^{19}\text{F}\{^1\text{H}\}$  NMR ( $\text{CDCl}_3$ , 377 MHz):  $\delta$  -153.1–-152.8 (2F, m), -146.1–-145.9 (2F, m);  $^{31}\text{P}$  NMR ( $\text{CDCl}_3$ , 162 MHz):  $\delta$  11.8 (m); IR ( $\text{NaCl}$ ,  $\text{cm}^{-1}$ ) 976, 1198, 1265, 1285, 1435, 1455, 1471, 1505, 1640; HRMS (ESI)  $m/z$ :  $[\text{M} + \text{Na}]^+$  Calcd for  $\text{C}_{30}\text{H}_{27}\text{F}_4\text{N}_2\text{NaOP}^+$  561.1695; Found 561.1693.

*N*-Butyl-2,3,5,6-tetrafluoro-4-(((2-fluorophenyl)diphenyl- $\lambda^5$ -phosphanylidene)amino)benzamide (**5e**)

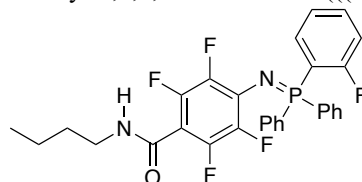

Colorless solid; TLC  $R_f$  0.41 (*n*-hexane/ EtAOc = 2/1); Mp 177–179 °C;  $^1\text{H}$  NMR ( $\text{CDCl}_3$ , 400 MHz):  $\delta$  0.91 (t, 3H,  $J = 7.3$  Hz), 1.31–1.42 (m, 2H), 1.49–1.58 (m, 2H), 3.39 (td, 2H,  $J = 6.0$ , 6.0 Hz), 5.96–6.03 (br, 1H), 7.04–7.12 (m, 1H), 7.29–7.36 (m, 1H), 7.43–7.51 (m, 4H), 7.52–7.62 (m, 3H), 7.73–7.83(m, 4H), 7.95–8.05 (m, 1H);  $^{13}\text{C}\{^1\text{H}\}$  NMR ( $\text{CDCl}_3$ , 101 MHz):  $\delta$  13.7, 19.9, 31.4, 39.6, 102.5 (t,  $J = 16.7$  Hz), 116.3 (dd,  $J = 28.7$ , 6.2 Hz), 118.7 (dd,  $J = 102$ , 17.6 Hz), 124.8 (dd,  $J = 10.6$ , 3.3 Hz), 128.6 (d,  $J = 13.0$  Hz), 129.9 (d,  $J = 107$  Hz), 131.9 (d,  $J = 10.6$  Hz), 132.2 (d,  $J = 2.9$  Hz), 132.4–133.0 (m), 134.9 (d,  $J = 2.2$  Hz), 135.0 (d,  $J = 2.6$  Hz), 140.9–143.8 (m), 143.3–146.2 (m), 159.9, 162.6 (dd,  $J = 250$ , 2.8 Hz);  $^{19}\text{F}\{^1\text{H}\}$  NMR ( $\text{CDCl}_3$ , 377 MHz):  $\delta$  -152.6–-152.3 (2F, m), -146.2–-145.9 (2F, m), -98.6–-98.4 (1F, m);  $^{31}\text{P}$  NMR ( $\text{CDCl}_3$ , 162 MHz):  $\delta$  6.0 (m); IR ( $\text{NaCl}$ ,  $\text{cm}^{-1}$ ) 1269, 1439, 1471, 1497, 1505, 1634, 1640, 1644; HRMS (ESI)  $m/z$ :  $[\text{M} + \text{Na}]^+$  Calcd for  $\text{C}_{29}\text{H}_{24}\text{F}_5\text{N}_2 \text{NaOP}^+$  565.1444; Found 565.1446.

*N*-Butyl-4-(((2-chlorophenyl)diphenyl- $\lambda^5$ -phosphanylidene)amino)-2,3,5,6-tetrafluorobenzamide (**5f**)

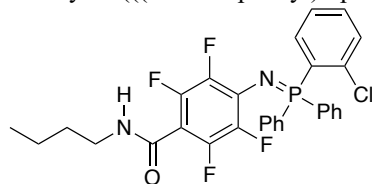

Colorless solid; TLC  $R_f$  0.36 (*n*-hexane/EtAOc = 2/1); Mp 183–185 °C;  $^1\text{H}$  NMR ( $\text{CDCl}_3$ , 400 MHz):  $\delta$  0.93 (t, 3H,  $J = 7.3$  Hz), 1.33–1.44 (m, 2H), 1.50–1.60 (m, 2H), 3.41 (td, 2H,  $J = 7.0$ , 7.0 Hz), 5.92–6.01 (br, 1H), 7.33–7.42 (m, 2H), 7.45–7.53 (m, 5H), 7.54–7.66 (m, 3H), 7.73–7.82 (m, 4H);  $^{13}\text{C}\{^1\text{H}\}$  NMR ( $\text{CDCl}_3$ , 101 MHz):  $\delta$  13.7, 20.0, 31.4, 39.6, 102.3, 126.8 (d,  $J = 11.1$  Hz), 128.7 (d,  $J = 13.1$  Hz), 129.5 (d,  $J = 92.6$  Hz), 129.8 (d,  $J = 113$  Hz), 131.2 (d,  $J = 7.0$  Hz), 132.1 (d,  $J = 3.0$  Hz), 132.2, 132.5–133.2 (m), 133.6 (d,  $J = 2.0$  Hz), 135.7 (d,  $J = 9.1$  Hz), 137.6 (d,  $J = 5.0$  Hz), 141.1–143.9 (m), 143.5–146.3 (m), 160.0;  $^{19}\text{F}\{^1\text{H}\}$  NMR ( $\text{CDCl}_3$ , 377 MHz):  $\delta$  -152.9–-152.6 (2F, m), -146.3–-146.0 (2F, m);  $^{31}\text{P}$  NMR ( $\text{CDCl}_3$ , 162 MHz):  $\delta$  8.7 (m); IR ( $\text{NaCl}$ ,  $\text{cm}^{-1}$ ) 1424, 1429, 1437, 1455, 1472, 1477, 1481, 1505; HRMS (ESI)  $m/z$ :  $[\text{M} + \text{Na}]^+$  Calcd for  $\text{C}_{29}\text{H}_{24}^{35}\text{ClF}_4\text{N}_2\text{NaOP}^+$  581.1149; Found 581.1148.

4-(((2-Bromophenyl)diphenyl- $\lambda^5$ -phosphanylidene)amino)-*N*-butyl-2,3,5,6-tetrafluorobenzamide (**5g**)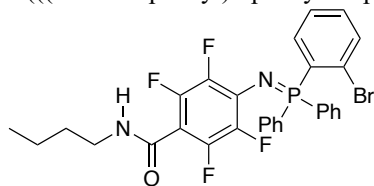

Colorless solid; TLC  $R_f$  0.39 (*n*-hexane/EtAOc = 2/1); Mp 147–150 °C;  $^1\text{H}$  NMR ( $\text{CDCl}_3$ , 400 MHz):  $\delta$  0.93 (t, 3H,  $J = 7.3$  Hz), 1.33–1.44 (m, 2H), 1.50–1.60 (m, 2H), 3.41 (td, 2H,  $J = 6.0, 6.0$  Hz), 5.94–6.02 (br, 1H), 7.34–7.43 (m, 2H), 7.44–7.53 (m, 5H), 7.54–7.63 (m, 3H), 7.73–7.82 (m, 4H);  $^{13}\text{C}\{^1\text{H}\}$  NMR ( $\text{CDCl}_3$ , 101 MHz):  $\delta$  13.7, 20.0, 31.4, 39.6, 102.2 (d,  $J = 16.4$  Hz), 126.5 (d,  $J = 5.8$  Hz), 127.2 (d,  $J = 10.7$  Hz), 128.7 (d,  $J = 13.1$  Hz), 129.9 (d,  $J = 115$  Hz), 131.4 (d,  $J = 89.9$  Hz), 132.1 (d,  $J = 2.9$  Hz), 132.2 (d,  $J = 10.2$  Hz), 132.8–133.3 (m), 133.5 (d,  $J = 2.3$  Hz), 134.9 (d,  $J = 7.4$  Hz), 136.1 (d,  $J = 10.1$  Hz), 141.1–143.9 (m), 143.5–146.4 (m), 160.0;  $^{19}\text{F}\{^1\text{H}\}$  NMR ( $\text{CDCl}_3$ , 377 MHz):  $\delta$  -153.0–-152.8 (2F, m), -146.2–-146.0 (2F, m);  $^{31}\text{P}$  NMR ( $\text{CDCl}_3$ , 162 MHz):  $\delta$  10.4 (m); IR (NaCl,  $\text{cm}^{-1}$ ) 1418, 1424, 1429, 1435, 1455, 1471, 1481, 1505, 1515, 1520, 1644; HRMS (ESI)  $m/z$ :  $[\text{M} + \text{Na}]^+$  Calcd for  $\text{C}_{29}\text{H}_{24}^{79}\text{BrF}_4\text{N}_2\text{NaOP}^+$  625.0643; Found 625.0641.

Methyl 4-(*N*-(4-(butylcarbamoyl)-2,3,5,6-tetrafluorophenyl)-*P,P*-diphenylphosphorimidoyl)benzoate (**5h**)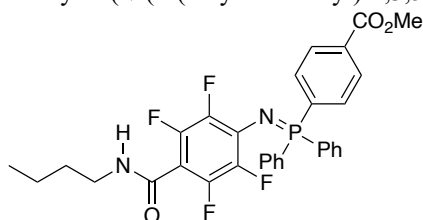

Colorless solid; TLC  $R_f$  0.27 (*n*-hexane/EtAOc = 2/1); Mp 60–63 °C;  $^1\text{H}$  NMR ( $\text{CDCl}_3$ , 400 MHz):  $\delta$  0.91 (t, 3H,  $J = 7.3$  Hz), 1.31–1.42 (m, 2H), 1.49–1.58 (m, 2H), 3.39 (td, 2H,  $J = 6.0, 6.0$  Hz), 3.92 (s, 3H), 5.98–6.05 (br, 1H), 7.44–7.51 (m, 4H), 7.53–7.60 (m, 2H), 7.66–7.75 (m, 4H), 7.79–7.87 (m, 2H), 8.03–8.13 (m, 2H);  $^{13}\text{C}\{^1\text{H}\}$  NMR ( $\text{CDCl}_3$ , 101 MHz):  $\delta$  13.6, 19.9, 31.4, 39.6, 52.5, 102.7, 128.8 (d,  $J = 12.6$  Hz), 129.5 (d,  $J = 12.6$  Hz), 129.8 (d,  $J = 103$  Hz), 132.2, 132.3 (d,  $J = 6.8$  Hz), 132.3 (d,  $J = 6.3$  Hz), 132.5–132.7 (m), 133.2 (d,  $J = 2.9$  Hz), 135.9 (d,  $J = 102$  Hz), 141.0–143.8 (m), 143.5–146.4 (m), 159.8, 160.0;  $^{19}\text{F}\{^1\text{H}\}$  NMR ( $\text{CDCl}_3$ , 377 MHz):  $\delta$  -152.4–-152.1 (2F, m), -146.0–-145.7 (2F, m);  $^{31}\text{P}$  NMR ( $\text{CDCl}_3$ , 162 MHz):  $\delta$  9.2 (m); IR (NaCl,  $\text{cm}^{-1}$ ) 1282, 1484, 1505, 1511, 1644, 1651; HRMS (ESI)  $m/z$ :  $[\text{M} + \text{Na}]^+$  Calcd for  $\text{C}_{31}\text{H}_{27}\text{F}_4\text{N}_2\text{NaO}_3\text{P}^+$  605.1593; Found 605.1595.

Methyl 2-(*N*-(4-(butylcarbamoyl)-2,3,5,6-tetrafluorophenyl)-*P,P*-diphenylphosphorimidoyl)-5-methoxybenzoate (**5i**)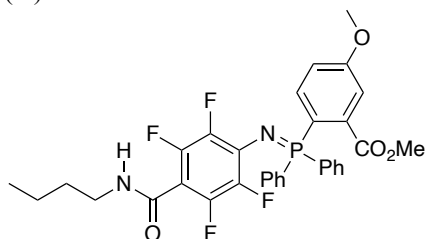

Colorless solid; TLC  $R_f$  0.23 (*n*-hexane/EtAOc = 2/1); Mp 69–71 °C;  $^1\text{H}$  NMR ( $\text{CDCl}_3$ , 400 MHz):  $\delta$  0.91 (t, 3H,  $J = 7.3$  Hz), 1.30–1.41 (m, 2H), 1.47–1.57 (m, 2H), 3.23 (s, 3H), 3.36 (td, 2H,  $J = 6.0, 6.0$  Hz), 3.87 (s, 3H), 6.03–6.10 (br, 1H), 6.97–7.03 (m, 1H), 7.36–7.55 (m, 8H), 7.68–7.77 (m, 4H);  $^{13}\text{C}\{^1\text{H}\}$  NMR ( $\text{CDCl}_3$ , 101 MHz):  $\delta$  13.6, 19.9, 31.4, 39.6, 51.9, 55.6, 102.2 (t,  $J = 15.4$  Hz), 116.4, 116.5 (d,  $J = 1.8$  Hz), 121.2 (d,  $J = 93.5$  Hz), 128.5 (d,  $J = 12.8$  Hz), 131.6 (d,  $J = 3.0$  Hz), 131.7 (d,  $J = 10.2$  Hz), 131.8 (d,  $J = 113$  Hz), 133.3–133.7 (m), 137.2 (d,  $J = 12.2$  Hz), 137.4 (d,  $J = 7.6$  Hz), 140.9–143.9 (m), 143.4–146.3 (m), 160.0, 162.2 (d,  $J = 2.4$  Hz), 166.9 (d,  $J = 2.2$  Hz);  $^{19}\text{F}\{^1\text{H}\}$  NMR ( $\text{CDCl}_3$ , 377 MHz):  $\delta$  -152.7–-152.4 (2F, m), -146.5–-146.2 (2F, m);  $^{31}\text{P}$  NMR ( $\text{CDCl}_3$ , 162 MHz):  $\delta$  11.1 (m); IR (NaCl,  $\text{cm}^{-1}$ ) 976, 1233, 1261, 1291, 1438, 1481, 1505, 1511, 1597, 1644, 1728; HRMS (ESI)  $m/z$ :  $[\text{M} + \text{Na}]^+$  Calcd for  $\text{C}_{32}\text{H}_{29}\text{F}_4\text{N}_2\text{NaO}_4\text{P}^+$  635.1699; Found 635.1697.

Dimethyl 2-(*N*-(4-(butylcarbamoyl)-2,3,5,6-tetrafluorophenyl)-*P,P*-diphenylphosphorimidoyl)terephthalate (**5j**)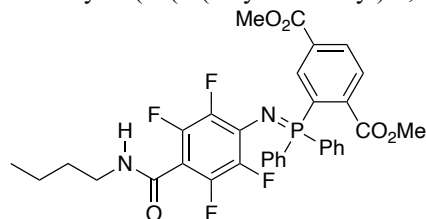

Pale yellow solid; TLC  $R_f$  0.30 ( $\text{CH}_2\text{Cl}_2/\text{MeOH} = 20/1$ ); Mp 68–72 °C;  $^1\text{H}$  NMR ( $\text{CDCl}_3$ , 400 MHz):  $\delta$  0.90 (t, 3H,  $J = 7.3$  Hz), 1.30–1.41 (m, 2H), 1.48–1.57 (m, 2H), 3.33 (s, 3H), 3.37 (td, 2H,  $J = 6.0, 6.0$  Hz), 3.86 (s, 3H), 6.00–6.08 (br, 1H), 7.44–7.52 (m, 4H), 7.53–7.59 (m, 2H), 7.66–7.75 (m, 4H), 7.87–7.92 (m, 1H), 8.17–8.23 (m, 1H), 8.23–8.27 (m, 1H);  $^{13}\text{C}\{^1\text{H}\}$  NMR ( $\text{CDCl}_3$ , 101 MHz):  $\delta$  13.6, 19.9, 31.3, 39.6, 52.3, 52.6, 102.6 (t,  $J = 16.7$  Hz), 128.7 (d,  $J = 13.0$  Hz), 130.4 (d,  $J = 111$  Hz), 130.6 (d,  $J = 8.5$  Hz), 131.8 (d,  $J = 91.7$  Hz), 131.8 (d,  $J = 10.3$  Hz), 132.1 (d,  $J = 2.8$  Hz), 132.2 (d,  $J = 12.0$  Hz), 132.8 (d,  $J = 2.2$  Hz), 132.6–133.0 (m), 135.5 (d,  $J = 12.0$  Hz), 139.6 (d,  $J = 6.3$  Hz), 140.9–143.8 (m), 143.3–146.2 (m), 159.9, 165.2, 166.8 (d,  $J = 2.8$  Hz);  $^{19}\text{F}\{^1\text{H}\}$  NMR ( $\text{CDCl}_3$ , 377 MHz):  $\delta$  -152.5–-152.2 (2F, m), -146.3–-145.9 (2F, m);  $^{31}\text{P}$  NMR ( $\text{CDCl}_3$ , 162 MHz):  $\delta$  10.8 (m); IR (NaCl,  $\text{cm}^{-1}$ ) 1285, 1481, 1484, 1505, 1515, 1520, 1644, 1651, 1728, 1731; HRMS (ESI)  $m/z$ :  $[\text{M} + \text{Na}]^+$  Calcd for  $\text{C}_{33}\text{H}_{29}\text{F}_4\text{N}_2\text{NaO}_5\text{P}^+$  663.1642; Found 663.1622.

Methyl 4-(butylcarbamoyl)-2-(*N*-(4-(butylcarbamoyl)-2,3,5,6-tetrafluorophenyl)-*P,P*-diphenylphosphorimidoyl)benzoate (**5k**)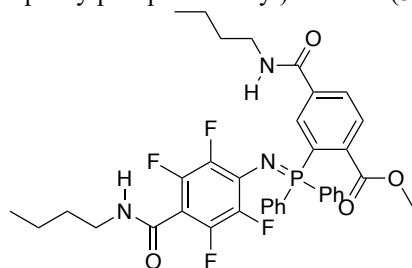

Colorless solid; TLC  $R_f$  0.30 ( $n$ -hexane/EtAc = 1/1); Mp 195–197 °C;  $^1\text{H}$  NMR ( $\text{CDCl}_3$ , 400 MHz):  $\delta$  0.89 (t, 3H,  $J = 7.3$  Hz), 0.90 (t, 3H,  $J = 7.3$  Hz), 1.27–1.39 (m, 4H), 1.46–1.56 (m, 4H), 3.29 (s, 3H), 3.34 (td, 4H,  $J = 5.9, 5.9$  Hz), 6.17 (t, 1H,  $J = 5.9$  Hz), 6.59 (t, 1H,  $J = 5.6$  Hz), 7.43–7.49 (m, 4H), 7.50–7.57 (m, 2H), 7.64–7.72 (m, 4H), 7.81–7.86 (m, 1H), 8.00–8.04 (m, 1H), 8.16–8.22 (m, 1H);  $^{13}\text{C}\{^1\text{H}\}$  NMR ( $\text{CDCl}_3$ , 101 MHz):  $\delta$  13.6 (two signals overlapped), 19.9, 20.0, 31.3, 31.3, 39.6, 39.9, 52.2, 102.7 (t,  $J = 17.1$  Hz), 130.2 (d,  $J = 110$  Hz), 130.4 (d,  $J = 2.1$  Hz), 130.7 (d,  $J = 8.6$  Hz), 131.7 (d,  $J = 92.4$  Hz), 131.8 (d,  $J = 10.4$  Hz), 132.0 (d,  $J = 2.7$  Hz), 132.5–133.0 (m), 133.4 (d,  $J = 10.9$  Hz), 137.0 (d,  $J = 11.0$  Hz), 137.7 (d,  $J = 6.7$  Hz), 141.0–143.8 (m), 143.3–146.1 (m), 159.9 (two signals overlapped), 165.4, 166.8 (d,  $J = 2.3$  Hz);  $^{19}\text{F}\{^1\text{H}\}$  NMR ( $\text{CDCl}_3$ , 377 MHz):  $\delta$  -152.5–-152.2 (2F, m), -146.0–-145.7 (2F, m);  $^{31}\text{P}$  NMR ( $\text{CDCl}_3$ , 162 MHz):  $\delta$  11.4 (m); IR (NaCl,  $\text{cm}^{-1}$ ) 1286, 1435, 1505, 1515, 1520, 1538, 1646, 1651; HRMS (ESI)  $m/z$ :  $[\text{M} + \text{Na}]^+$  Calcd for  $\text{C}_{36}\text{H}_{36}\text{F}_4\text{N}_3\text{NaO}_4\text{P}^+$  704.2277; Found 704.2262.

*tert*-Butyl (1-(4-azido-3,5-dichlorophenyl)-1-oxo-5,8,11-trioxa-2-azatridecan-13-yl)carbamate (**8**)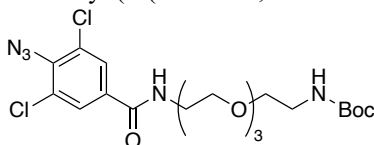

Pale yellow oil; TLC  $R_f$  0.37 ( $\text{CH}_2\text{Cl}_2/\text{MeOH} = 20/1$ );  $^1\text{H}$  NMR ( $\text{CDCl}_3$ , 400 MHz):  $\delta$  1.45 (s, 9H), 3.25–3.33 (br, 2H), 3.51–3.57 (br, 2H), 3.61–3.72 (m, 12H), 5.02 (br, 1H), 7.00 (br, 1H), 7.80 (br, 2H);  $^{13}\text{C}\{^1\text{H}\}$  NMR ( $\text{CDCl}_3$ , 101 MHz):  $\delta$  28.4, 29.7, 40.1, 40.3, 69.5, 70.1, 70.2, 70.3, 70.4, 79.3, 125.8, 128.0, 129.2, 132.5, 155.9, 164.1; IR (NaCl,  $\text{cm}^{-1}$ ) 1455, 1538, 1548, 1694, 1712, 2125, 2872, 2919, 2923, 2965, 3337; HRMS (ESI)  $m/z$ :  $[\text{M} + \text{Na}]^+$  Calcd for  $\text{C}_{20}\text{H}_{29}^{35}\text{Cl}_2\text{N}_5\text{NaO}_6^+$  528.1392; Found 528.1393.

4-Azido-*N*-(1-(4-azido-3,5-dichlorophenyl)-1-oxo-5,8,11-trioxa-2-azatridecan-13-yl)-2,3,5,6-tetrafluorobenzamide (**9**)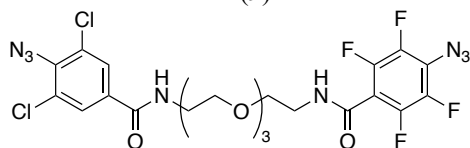

Yellow oil; TLC  $R_f$  0.35 ( $\text{CH}_2\text{Cl}_2/\text{MeOH} = 20/1$ );  $^1\text{H}$  NMR ( $\text{CDCl}_3$ , 400 MHz):  $\delta$  3.50–3.65 (m, 16H), 7.07–7.13 (br, 1H), 7.19–7.25 (br, 1H), 7.68 (s, 2H);  $^{13}\text{C}\{^1\text{H}\}$  NMR ( $\text{CDCl}_3$ , 101 MHz):  $\delta$  39.9, 39.9, 69.2, 69.3, 70.0, 70.1, 70.2 (two signals overlapped), 111.4 (t,  $J = 18.7$  Hz), 121.3–121.7 (m), 127.7, 129.0, 132.1, 136.3, 138.7–141.5 (m), 142.3–145.2 (m), 157.7, 164.1;  $^{19}\text{F}\{^1\text{H}\}$  NMR ( $\text{CDCl}_3$ , 377 MHz):  $\delta$  -150.9–-150.6 (2F, m), -141.2–-140.9 (2F, m); IR (NaCl,  $\text{cm}^{-1}$ ) 994, 1269, 1286, 1305, 1324, 1455, 1487, 1548, 1651, 1657, 1667, 2126; HRMS (ESI)  $m/z$ :  $[\text{M} + \text{Na}]^+$  Calcd for  $\text{C}_{22}\text{H}_{20}^{35}\text{Cl}_2\text{F}_4\text{N}_8\text{NaO}_5^+$  645.0768; Found 645.0765.

Methyl 2-(*N*-(4-((1-(4-azido-3,5-dichlorophenyl)-1-oxo-5,8,11-trioxa-2-azatridecan-13-yl)carbamoyl)-2,3,5,6-tetrafluorophenyl)-*P,P*-diphenylphosphorimidoyl)benzoate (**10**)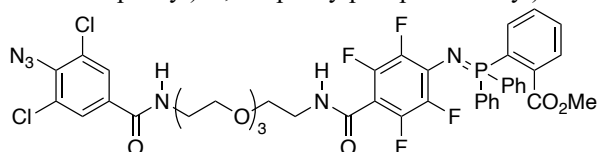

Colorless oil; TLC  $R_f$  0.30 ( $\text{CH}_2\text{Cl}_2/\text{MeOH} = 20/1$ );  $^1\text{H}$  NMR ( $\text{CDCl}_3$ , 400 MHz):  $\delta$  3.27, (s, 3H), 3.53–3.67 (m, 16H), 6.55–6.62 (br, 1H), 7.05–7.13 (br, 1H), 7.43–7.57 (m, 8H), 7.60–7.77 (m, 7H), 7.83–7.89 (m, 1H);  $^{13}\text{C}\{^1\text{H}\}$  NMR ( $\text{CDCl}_3$ , 101 MHz):  $\delta$  39.6, 39.9, 52.0, 69.3, 69.5, 70.1, 70.2, 70.3, 70.3, 101.9 (t,  $J = 16.4$  Hz), 125.7, 127.9, 128.6 (d,  $J = 13.0$  Hz), 129.1, 130.7 (d,  $J = 8.6$  Hz), 131.0 (d,  $J = 155.7$  Hz), 131.1 (d,  $J = 11.8$  Hz), 131.2 (d,  $J = 111.8$  Hz), 131.7 (d,  $J = 10.5$  Hz), 132.1 (d,  $J = 2.1$  Hz), 132.5, 133.3–133.8 (m), 135.0 (d,  $J = 11.0$  Hz), 135.6 (d,  $J = 6.1$  Hz), 136.3, 141.0–143.8 (m), 143.3–146.3 (m), 160.1, 164.1, 167.3 (d,  $J = 2.6$  Hz);  $^{19}\text{F}\{^1\text{H}\}$  NMR ( $\text{CDCl}_3$ , 377 MHz):  $\delta$  -152.6–-152.3 (2F, m), -146.2–-145.9 (2F, m);  $^{31}\text{P}$  NMR ( $\text{CDCl}_3$ , 162 MHz):  $\delta$  10.8 (br); IR (NaCl,  $\text{cm}^{-1}$ ) 1115, 1294, 1438, 1455, 1484, 1505, 1511, 1515, 1644, 1651, 1728, 2125; HRMS (ESI)  $m/z$ :  $[\text{M} + \text{Na}]^+$  Calcd for  $\text{C}_{42}\text{H}_{37}^{35}\text{Cl}_2\text{F}_4\text{N}_6\text{NaO}_7\text{P}^+$  937.1672; Found 937.1667.

Methyl 2-(*N*-(4-((1-(3,5-dichloro-4-((triphenyl- $\lambda^5$ -phosphanylidene)amino)phenyl)-1-oxo-5,8,11-trioxa-2-azatridecan-13-yl)carbamoyl)-2,3,5,6-tetrafluorophenyl)-*P,P*-diphenylphosphorimidoyl)benzoate (**11**)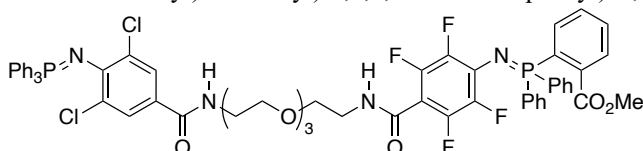

Colorless solid; TLC  $R_f$  0.36 ( $\text{CH}_2\text{Cl}_2/\text{MeOH} = 20/1$ ); Mp 68–70 °C;  $^1\text{H}$  NMR ( $\text{CDCl}_3$ , 400 MHz):  $\delta$  3.27 (s, 3H), 3.51–3.66 (m, 16H), 6.54–6.65 (br, 2H), 7.38–7.56 (m, 17H), 7.59–7.65 (m, 3H), 7.68–7.77 (m, 10H), 7.84–7.90 (m, 1H);  $^{13}\text{C}\{^1\text{H}\}$  NMR ( $\text{CDCl}_3$ , 101 MHz):  $\delta$  39.5, 39.6, 52.0, 69.5, 69.7, 70.1, 70.3, 70.3, 70.3, 102.1, 124.5, 126.7, 128.3 (d,  $J = 12.4$  Hz), 128.6 (d,  $J = 13.0$  Hz), 130.2–131.9 (m, eight signals are observed as multiplet peaks), 132.1 (d,  $J = 2.6$  Hz), 132.2, 132.5 (d,  $J = 10.1$  Hz), 133.1–133.5 (m), 135.0 (d,  $J = 10.9$  Hz), 135.7 (d,  $J = 6.2$  Hz), 141.0–143.9 (m), 143.4–146.3 (m), 147.9, 160.1, 165.7, 167.3 (d,  $J = 2.7$  Hz);  $^{19}\text{F}\{^1\text{H}\}$  NMR ( $\text{CDCl}_3$ , 377 MHz):  $\delta$  -152.7–-152.3 (2F, m), -146.3–-145.9 (2F, m);  $^{31}\text{P}$  NMR ( $\text{CDCl}_3$ , 162 MHz):  $\delta$  2.2 (1P, m), 11.3 (1P, m); IR (NaCl,  $\text{cm}^{-1}$ ) 1115, 1266, 1286, 1438, 1484, 1495, 1504, 1644; HRMS (ESI)  $m/z$ :  $[\text{M} + \text{Na}]^+$  Calcd for  $\text{C}_{60}\text{H}_{52}^{35}\text{Cl}_2\text{F}_4\text{N}_4\text{NaO}_7\text{P}_2^+$  1171.2522; Found 1171.2519.

*tert*-Butyl 2-(2-(2-(2-azidoethoxy)ethoxy)ethoxy)ethyl(prop-2-yn-1-yl)carbamate (**14**)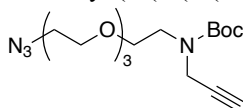

Color less oil; TLC  $R_f$  0.42 ( $n$ -hexane/EtAOc = 1/1);  $^1\text{H}$  NMR ( $\text{CDCl}_3$ , 400 MHz):  $\delta$  1.39 (s, 9H), 2.14 (s, 1H), 3.29–3.34 (m, 2H), 3.39–3.45 (m, 2H), 3.50–3.63 (m, 12H), 3.99–4.11 (br, 2H);  $^{13}\text{C}\{^1\text{H}\}$  NMR ( $\text{CDCl}_3$ , 101 MHz):  $\delta$  28.1, 36.5, 37.4, 45.5, 50.4, 69.5, 69.8, 70.2, 70.4 (d,  $J = 2.6$  Hz), 70.8, 71.3, 79.8, 80.0, 154.7; IR (NaCl,  $\text{cm}^{-1}$ ) 1143, 1172, 1249, 1266, 1366, 1409, 1459, 1693, 1697, 2109, 2870; HRMS (ESI)  $m/z$ :  $[\text{M} + \text{Na}]^+$  Calcd for  $\text{C}_{16}\text{H}_{28}\text{N}_4\text{O}_5^+$  379.1957; Found 379.1958.



*tert*-Butyl (1-(4-azido-2,3,5,6-tetrafluorophenyl)-1-oxo-5,8,11-trioxa-2-azatridecan-13-yl)(prop-2-yn-1-yl)carbamate (**15**)

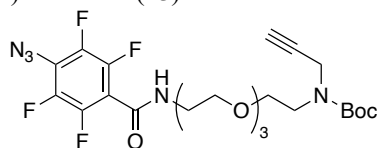

Yellow oil; TLC  $R_f$  0.38 ( $\text{CH}_2\text{Cl}_2/\text{MeOH} = 20/1$ );  $^1\text{H}$  NMR ( $\text{CDCl}_3$ , 400 MHz):  $\delta$  1.45 (s, 9H), 2.17 (s, 1H), 3.44–3.69 (m, 15H), 3.92–3.97 (m, 2H), 4.02–4.15 (br, 2H);  $^{13}\text{C}\{^1\text{H}\}$  NMR ( $\text{CDCl}_3$ , 101 MHz):  $\delta$  28.3, 36.7, 37.5, 45.9, 47.1, 68.7, 69.7, 70.3, 70.4, 70.8, 71.3, 79.9, 80.2, 110.3–111.0 (m), 122.6–123.1 (m), 138.9–141.7 (m), 142.1–144.9 (m), 154.8, 161.0;  $^{19}\text{F}\{^1\text{H}\}$  NMR ( $\text{CDCl}_3$ , 377 MHz):  $\delta$  –150.7––150.4 (2F, m), –141.0––140.4 (2F, m); IR ( $\text{NaCl}$ ,  $\text{cm}^{-1}$ ) 993, 1143, 1251, 1269, 1414, 1485, 1494, 1651, 1660, 1667, 2128, 3305; HRMS (ESI)  $m/z$ :  $[\text{M} + \text{Na}]^+$  Calcd for  $\text{C}_{23}\text{H}_{29}\text{F}_4\text{N}_5\text{NaO}_6^+$  570.1952; Found 875.1574.

4-Azido-*N*-(12-(4-azido-3,5-dichlorobenzoyl)-3,6,9-trioxa-12-azapentadec-14-yn-1-yl)-2,3,5,6-tetrafluorobenzamide (**16**)

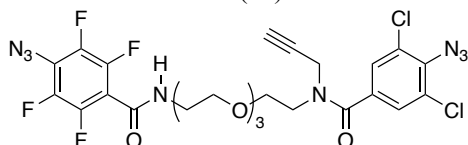

Yellow oil; TLC  $R_f$  0.41 ( $\text{CH}_2\text{Cl}_2/\text{MeOH} = 20/1$ );  $^1\text{H}$  NMR ( $\text{CDCl}_3$ , 400 MHz):  $\delta$  2.27–2.44 (br, 1H), 3.45–3.80 (m, 16H), 4.06–4.31 (br, 2H), 7.47 (s, 2H), 7.72 (br s, 1H);  $^{13}\text{C}\{^1\text{H}\}$  NMR ( $\text{CDCl}_3$ , 101 MHz):  $\delta$  33.8, 40.1, 48.0, 53.4, 66.8, 69.7, 70.3, 70.5, 72.9, 73.1, 77.9, 110.8, 121.4, 127.6, 128.3, 129.1, 133.9, 138.8–141.7 (m), 142.6–145.3 (m), 157.8, 169.3;  $^{19}\text{F}\{^1\text{H}\}$  NMR ( $\text{CDCl}_3$ , 377 MHz):  $\delta$  –151.4––150.6 (2F, m), –141.1––140.5 (2F, m); IR ( $\text{NaCl}$ ,  $\text{cm}^{-1}$ ) 1488, 1494, 1623, 1634, 1646, 1651, 1668, 1674, 1683, 2125; HRMS (ESI)  $m/z$ :  $[\text{M} + \text{Na}]^+$  Calcd for  $\text{C}_{25}\text{H}_{22}^{35}\text{Cl}_2\text{F}_4\text{N}_8\text{NaO}_5^+$  683.0924; Found 683.0921.

Methyl 2-(*N*-(4-((12-(4-azido-3,5-dichlorobenzoyl)-3,6,9-trioxa-12-azapentadec-14-yn-1-yl)carbamoyl)-2,3,5,6-tetrafluorophenyl)-*P,P*-diphenylphosphorimidoyl)benzoate (**S1**)

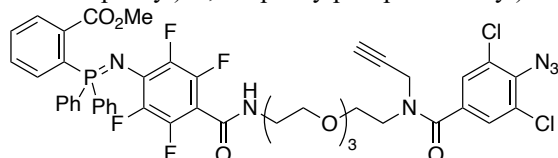

Pale yellow oil; TLC  $R_f$  0.36 ( $\text{CH}_2\text{Cl}_2/\text{MeOH} = 20/1$ );  $^1\text{H}$  NMR ( $\text{CDCl}_3$ , 400 MHz):  $\delta$  2.23–2.44 (br, 1H), 3.27 (s, 3H), 3.47–3.82 (m, 16H), 4.04–4.40 (br, 2H), 6.52–6.70 (br, 1H), 7.43–7.56 (m, 10H), 7.60–7.65 (m, 1H), 7.68–7.76 (m, 4H), 7.85–7.90 (m, 1H);  $^{13}\text{C}\{^1\text{H}\}$  NMR ( $\text{CDCl}_3$ , 101 MHz):  $\delta$  29.6, 39.5, 40.6, 47.9, 52.0, 53.4, 67.5, 69.6, 70.2, 70.4, 72.7, 78.3, 102.1, 128.5 (d,  $J = 12.8$  Hz), 129.2, 130.7, 130.7, 130.7 (d,  $J = 89.8$  Hz), 131.1 (d,  $J = 12.0$  Hz), 131.4–131.9 (m, five signals are observed as multiplet peaks), 132.0 (d,  $J = 2.5$  Hz), 133.2–133.6 (m), 135.0 (d,  $J = 11.1$  Hz), 135.6 (d,  $J = 6.1$  Hz), 141.0–143.8 (m), 143.4–146.3 (m), 160.1, 167.2, 167.2;  $^{19}\text{F}\{^1\text{H}\}$  NMR ( $\text{CDCl}_3$ , 377 MHz):  $\delta$  –152.7––152.4 (2F, m), –146.2––145.9 (2F, m);  $^{31}\text{P}$  NMR ( $\text{CDCl}_3$ , 162 MHz):  $\delta$  11.0; IR ( $\text{NaCl}$ ,  $\text{cm}^{-1}$ ) 1505, 1515, 1634, 1644, 2123, 2873, 2916, 3300, 3583; HRMS (ESI)  $m/z$ :  $[\text{M} + \text{Na}]^+$  Calcd for  $\text{C}_{45}\text{H}_{39}^{35}\text{Cl}_2\text{F}_4\text{N}_6\text{NaO}_7\text{P}^+$  975.1829; Found 975.1829.

Methyl 2-(*N*-(4-((12-(3,5-dichloro-4-((triphenyl- $\lambda^5$ -phosphanylidene)amino)benzoyl)-3,6,9-trioxa-12-azapentadec-14-yn-1-yl)carbamoyl)-2,3,5,6-tetrafluorophenyl)-*P,P*-diphenylphosphorimidoyl)benzoate (**S3**)

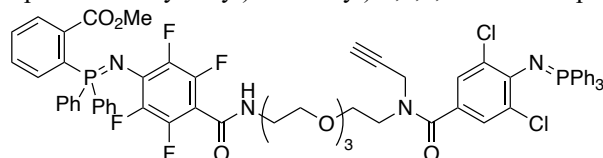

Pale yellow oil; TLC  $R_f$  0.41 ( $\text{CH}_2\text{Cl}_2/\text{MeOH} = 20/1$ );  $^1\text{H}$  NMR ( $\text{CDCl}_3$ , 400 MHz):  $\delta$  2.27 (s, 1H), 3.27 (s, 3H), 3.43–3.71 (m, 16H), 4.16–4.30 (br, 2H), 6.56–6.62 (br, 1H), 7.33–7.57 (m, 19H), 7.59–7.66 (m, 1H), 7.68–7.78 (m, 10H), 7.85–7.90 (m, 1H);  $^{13}\text{C}\{^1\text{H}\}$  NMR ( $\text{CDCl}_3$ , 101 MHz):  $\delta$  29.7, 39.6, 50.8, 52.1, 69.1, 69.7, 70.4, 70.4, 70.5, 70.5, 72.6, 79.1, 102.3 (d,  $J = 16.0$  Hz), 125.2, 127.2, 128.4 (d,  $J = 12.5$  Hz), 128.7 (d,  $J = 13.0$  Hz), 130.8, 130.8 (d,  $J = 16.9$  Hz), 130.8 (d,  $J = 91.5$  Hz), 131.2 (d,  $J = 11.8$  Hz), 131.4, 131.6 (d,  $J = 2.8$  Hz), 131.8 (d,  $J = 10.0$  Hz), 131.9 (d,  $J = 12.8$  Hz), 132.1 (d,  $J = 2.5$  Hz), 132.5, 132.6 (d,  $J = 10.1$  Hz), 133.3–133.7 (m), 135.1 (d,  $J = 11.1$  Hz), 135.7 (d,  $J = 6.2$  Hz), 141.1–144.0 (m), 143.5–146.4 (m), 146.7, 160.2, 167.3, 167.3;  $^{19}\text{F}\{^1\text{H}\}$  NMR ( $\text{CDCl}_3$ , 377 MHz):  $\delta$  –152.6––152.4 (2F, m), –146.2––145.9 (2F, m);  $^{31}\text{P}$  NMR ( $\text{CDCl}_3$ , 162 MHz):  $\delta$  1.6 (1P,

m), 11.2 (1P, m); IR (NaCl,  $\text{cm}^{-1}$ ) 1113, 1266, 1278, 1417, 1435, 1454, 1485, 1495, 1504, 1514, 1641; HRMS (ESI)  $m/z$ :  $[\text{M} + \text{Na}]^+$  Calcd for  $\text{C}_{63}\text{H}_{54}^{35}\text{Cl}_2\text{F}_4\text{N}_4\text{NaO}_7\text{P}_2^+$  875.1571; Found 875.1574.

Methyl 2-(*N*-(4-((2-((1-benzyl-1*H*-1,2,3-triazol-4-yl)methyl)-1-(3,5-dichloro-4-((triphenyl- $\lambda^5$ -phosphaneylidene)amino)phenyl)-1-oxo-5,8,11-trioxo-2-azatriecan-13-yl)carbamoyl)-2,3,5,6-tetrafluorophenyl)-*P,P*-diphenylphosphorimidoyl)benzoate (**17**)

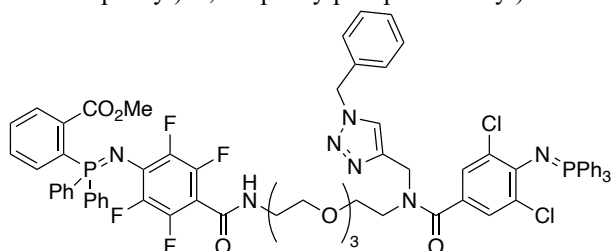

Pale yellow oil; TLC  $R_f$  0.32 ( $\text{CH}_2\text{Cl}_2/\text{MeOH} = 20/1$ );  $^1\text{H}$  NMR ( $\text{CDCl}_3$ , 400 MHz):  $\delta$  1.73–1.88 (br, 1H), 3.26 (s, 3H), 3.30–3.70 (m, 16H), 4.46 (s, 2H), 5.46 (s, 2H), 6.71–6.82 (br, 1H), 7.00–7.36 (m, 7H), 7.38–7.56 (m, 17H), 7.58–7.66 (m, 1H), 7.68–7.77 (m, 10H), 7.84–7.90 (m, 1H);  $^{13}\text{C}\{^1\text{H}\}$  NMR ( $\text{CDCl}_3$ , 101 MHz):  $\delta$  29.7, 39.6, 41.3, 44.9, 49.4, 52.1, 53.5, 54.1, 68.2, 69.7, 70.3, 70.5, 70.5, 102.4, 125.8, 127.4, 128.0, 128.4 (d,  $J = 12.4$  Hz), 128.6 (d,  $J = 12.9$  Hz), 128.7, 129.1, 130.4, 130.8, 130.9, 131.0 (d,  $J = 51.7$  Hz), 131.2, 131.4, 131.6 (d,  $J = 2.7$  Hz), 131.8 (d,  $J = 10.1$  Hz), 131.8 (d,  $J = 3.0$  Hz), 132.0, 132.1 (d,  $J = 1.5$  Hz), 132.6 (d,  $J = 10.1$  Hz), 134.6–134.8 (m), 135.1 (d,  $J = 11.1$  Hz), 135.7 (d,  $J = 6.4$  Hz), 141.0–143.8 (m), 143.5–146.3 (m), 144.8, 160.2, 167.3, 167.3;  $^{19}\text{F}\{^1\text{H}\}$  NMR ( $\text{CDCl}_3$ , 377 MHz):  $\delta$  -152.7–-152.4 (2F, m), -146.1–-145.9 (2F, m);  $^{31}\text{P}$  NMR ( $\text{CDCl}_3$ , 162 MHz):  $\delta$  1.6 (1P, m), 11.2 (1P, m); IR (NaCl,  $\text{cm}^{-1}$ ) 1113, 1266, 1435, 1455, 1484, 1505, 1515, 1641, 3448; HRMS (ESI)  $m/z$ :  $[\text{M} + \text{Na}]^+$  Calcd for  $\text{C}_{70}\text{H}_{61}^{35}\text{Cl}_2\text{F}_4\text{N}_7\text{NaO}_7\text{P}_2^+$  1342.3319; Found 1342.3314.

Methyl 6-((4-(15-(4-azido-2,3,5,6-tetrafluorophenyl)-2-(4-azido-3,5-dichlorobenzoyl)-15-oxo-5,8,11-trioxo-2,14-diazapentadecyl)-1*H*-1,2,3-triazol-1-yl)methyl)nicotinate (**19**)

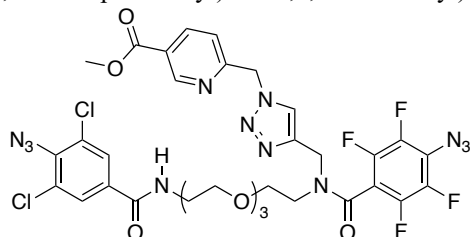

Pale yellow solid; TLC  $R_f$  0.23 ( $\text{CH}_2\text{Cl}_2/\text{MeOH} = 20/1$ ); Mp 91–93 °C;  $^1\text{H}$  NMR ( $\text{CDCl}_3$ , 400 MHz):  $\delta$  2.97–3.02 (m, 2H), 3.16 (t, 2H,  $J = 4.8$  Hz), 3.35–3.72 (m, 12H), 3.96 (s, 3H), 4.71 (s, 2H), 5.79 (s, 2H), 7.12 (d, 1H,  $J = 8.2$  Hz), 7.39 (s, 2H), 8.13 (s, 1H), 8.27 (dd, 1H,  $J = 8.2$  Hz, 2.1 Hz), 8.52 (t, 1H,  $J = 4.9$  Hz), 9.15 (d, 1H,  $J = 1.5$  Hz);  $^{13}\text{C}\{^1\text{H}\}$  NMR ( $\text{CDCl}_3$ , 101 MHz):  $\delta$  40.4, 43.2, 51.1, 52.6, 54.8, 59.3, 63.4, 67.9, 69.7, 69.9, 70.2, 70.3, 70.5, 121.0, 125.3, 125.5, 127.9, 129.0, 134.2, 134.8, 138.4–138.8 (m), 138.3, 142.0–142.5 (m), 144.7, 150.6, 157.9, 159.3, 165.1, 169.9;  $^{19}\text{F}\{^1\text{H}\}$  NMR ( $\text{CDCl}_3$ , 377 MHz):  $\delta$  -151.4–-151.2 (2F, m), -141.0–-140.7 (2F, m); IR (NaCl,  $\text{cm}^{-1}$ ) 1122, 1292, 1437, 1487, 1627, 1651, 1683, 1728, 2125; HRMS (ESI)  $m/z$ :  $[\text{M} + \text{Na}]^+$  Calcd for  $\text{C}_{33}\text{H}_{30}^{35}\text{Cl}_2\text{F}_4\text{N}_{12}\text{NaO}_7^+$  875.1571; Found 875.1574

Methyl 4-((2-(2-((6-chlorohexyl)oxy)ethoxy)ethyl)carbamoyl)-2-(diphenylphosphanyl)benzoate (**20**)

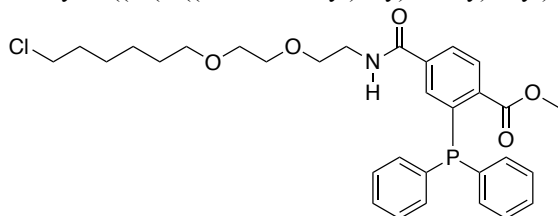

Yellow oil; TLC  $R_f$  0.52 ( $\text{CH}_2\text{Cl}_2/\text{MeOH} = 20/1$ );  $^1\text{H}$  NMR ( $\text{CDCl}_3$ , 400 MHz):  $\delta$  1.27–1.45 (m, 4H), 1.50–1.59 (m, 2H), 1.67–1.77 (m, 2H), 3.43 (t, 2H,  $J = 6.7$  Hz), 3.47–3.60 (m, 10H), 3.73 (s, 3H), 6.52 (t, 1H,  $J = 5.0$  Hz), 7.24–7.36 (m, 11H), 7.76 (dd, 1H,  $J = 8.0, 1.4$  Hz), 8.05–8.09 (m, 1H);  $^{13}\text{C}\{^1\text{H}\}$  NMR ( $\text{CDCl}_3$ , 101 MHz):  $\delta$  25.3, 26.5, 29.3, 32.3, 39.7, 44.9, 52.2, 69.4, 69.9, 70.1, 71.2, 126.6, 128.5 (d,  $J = 7.4$  Hz), 128.9, 130.7 (d,  $J = 2.3$  Hz), 132.6, 133.8 (d,  $J = 21.0$  Hz), 136.4 (d,  $J = 18.5$  Hz), 137.1 (d,  $J = 10.5$  Hz), 137.3, 141.4 (d,  $J = 29.0$  Hz), 166.3, 166.5 (d,  $J = 2.3$  Hz);  $^{31}\text{P}$  NMR ( $\text{CDCl}_3$ , 162 MHz):  $\delta$  -3.8 (m); IR (NaCl,  $\text{cm}^{-1}$ ) 1116, 1253, 1288, 1434, 1537,

1650, 1656, 1660, 1664, 1721, 2863, 2936; HRMS (ESI)  $m/z$ :  $[M + Na]^+$  Calcd for  $C_{31}H_{37}^{35}ClNNaO_5P^+$  592.1996; Found 592.1997.

4-(Diphenylphosphanyl)-*N*-((11-oxo-2,3,6,7-tetrahydro-1*H*,5*H*,11*H*-pyrano[2,3-*f*]pyrido[3,2,1-*ij*]quinolin-9-yl)methyl)benzamide (**21**)

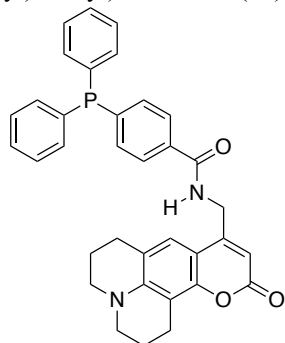

Yellow solid; TLC  $R_f$  0.42 ( $CH_2Cl_2/MeOH = 20/1$ ); Mp 158–160 °C;  $^1H$  NMR ( $CDCl_3$ , 400 MHz):  $\delta$  1.84–1.98 (m, 4H), 2.67–2.78 (m, 4H), 3.16–3.28 (m, 4H), 4.71 (d, 2H,  $J = 5.8$  Hz), 5.95 (s, 1H), 7.04 (s, 1H), 7.27–7.40 (m, 12H), 7.82 (d, 2H,  $J = 6.8$  Hz);  $^{13}C\{^1H\}$  NMR ( $CDCl_3$ , 101 MHz):  $\delta$  20.3, 20.5, 21.4, 27.7, 40.1, 49.4, 49.9, 105.9, 106.6, 106.7, 118.3, 121.0, 127.0, 127.0, 128.7 (d,  $J = 7.2$  Hz), 129.1, 133.5 (d,  $J = 18.7$  Hz), 133.7 (d,  $J = 13.4$  Hz), 133.9 (d,  $J = 19.8$  Hz), 136.2 (d,  $J = 10.6$  Hz), 146.0, 151.1, 152.4, 162.7, 167.0;  $^{31}P$  NMR ( $CDCl_3$ , 162 MHz):  $\delta$  -5.5 (m); FL (MeOH)  $\lambda_{max} = 525$  nm; IR (NaCl,  $cm^{-1}$ ) 1182, 1312, 1557, 1603, 1614, 1700, 1704, 1713; HRMS (ESI)  $m/z$ :  $[M + Na]^+$  Calcd for  $C_{35}H_{31}N_2NaO_3P^+$  581.1970; Found 581.1973.

Methyl 2-(*N*-4-((12-(4-azido-3,5-dichlorobenzoyl)-3,6,9-trioxa-12-azapentadec-14-yn-1-yl)carbamoyl)-2,3,5,6-tetrafluorophenyl)-*P,P*-diphenylphosphorimidoyl)-4-((2-(2-((6-chlorohexyl)oxy)ethoxy)ethyl)carbamoyl)benzoate (**S2**)

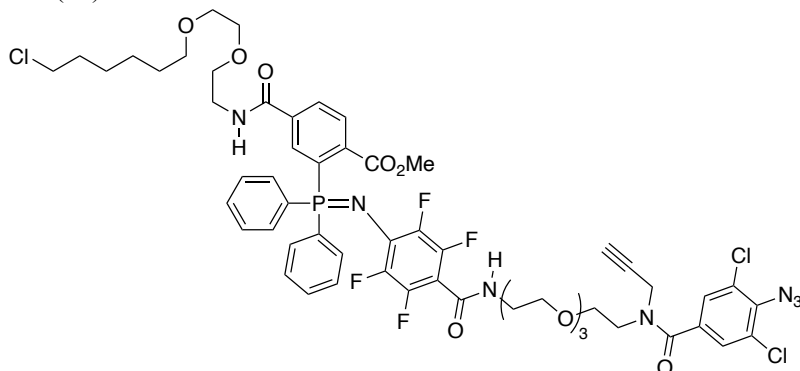

Yellow solid; TLC  $R_f$  0.23 ( $CH_2Cl_2/MeOH = 20/1$ ); Mp 47–49 °C;  $^1H$  NMR ( $CDCl_3$ , 400 MHz):  $\delta$  1.19–1.44 (m, 4H), 1.48–1.58 (m, 2H), 1.66–1.75 (m, 2H), 2.12–2.45 (br, 1H), 3.31 (s, 3H), 3.44–3.65 (m, 30H), 4.10–4.34 (br, 1H), 6.87–6.94 (br, 1H), 7.42–7.57 (m, 8H), 7.64–7.73 (m, 4H), 7.84–7.90 (m, 1H), 7.96–8.02 (m, 1H), 8.15–8.29 (m, 1H);  $^{13}C\{^1H\}$  NMR ( $CDCl_3$ , 101 MHz):  $\delta$  14.0, 14.1, 21.0, 22.6, 25.3, 26.5, 29.3, 31.5, 32.4, 39.6, 39.9, 40.6, 45.0, 52.2, 60.3, 69.3, 69.6, 69.9, 70.2, 70.2, 70.4, 71.2, 102.4, 128.5–132.5 (m), 133.7 (d,  $J = 11.3$  Hz), 136.7 (d,  $J = 11.3$  Hz), 138.0 (d,  $J = 6.5$  Hz), 140.9–143.2 (m), 143.8–146.4 (m), 160.0, 165.3, 166.8;  $^{19}F\{^1H\}$  NMR ( $CDCl_3$ , 377 MHz):  $\delta$  -136.9–-137.3 (2F, m), -150.5–-150.9 (2F, m);  $^{31}P$  NMR ( $CDCl_3$ , 162 MHz):  $\delta$  10.9 (m); HPLC analysis: Rt = 33.1 min [column: Shiseido CAPCELL PAK MG II (4.6 mm i.d.  $\times$  250 mm); mobile phase: MeOH:H<sub>2</sub>O = 40:60 (0–5 min), linear gradient from 40:60 to 99:1 (5–30 min), 99:1 (30–50 min); flow rate: 1.00 mL/min; detection: UV at 254 nm]; IR (NaCl,  $cm^{-1}$ ) 977, 1116, 1282, 1437, 1481, 1505, 1511, 1644, 1651, 1657, 1731, 2123, 2867, 2936; HRMS (ESI)  $m/z$ :  $[M + Na]^+$  Calcd for  $C_{56}H_{59}^{35}Cl_3F_4N_7NaO_{10}P^+$  1224.2960; Found 1224.2964.

Methyl 4-((2-(2-((6-chlorohexyl)oxy)ethoxy)ethyl)carbamoyl)-2-(*N*-(4-((12-(3,5-dichloro-4-(((4-(((11-oxo-2,3,6,7-tetrahydro-1*H*,5*H*,11*H*-pyrano[2,3-*f*]pyrido[3,2,1-*ij*]quinolin-9-yl)methyl)carbamoyl)phenyl)diphenyl- $\lambda^5$ -phosphanylidene)amino)benzoyl)-3,6,9-trioxa-12-azapentadec-14-yn-1-yl)carbamoyl)-2,3,5,6-tetrafluorophenyl)-*P,P*-diphenylphosphorimidoyl)benzoate (**S4**)

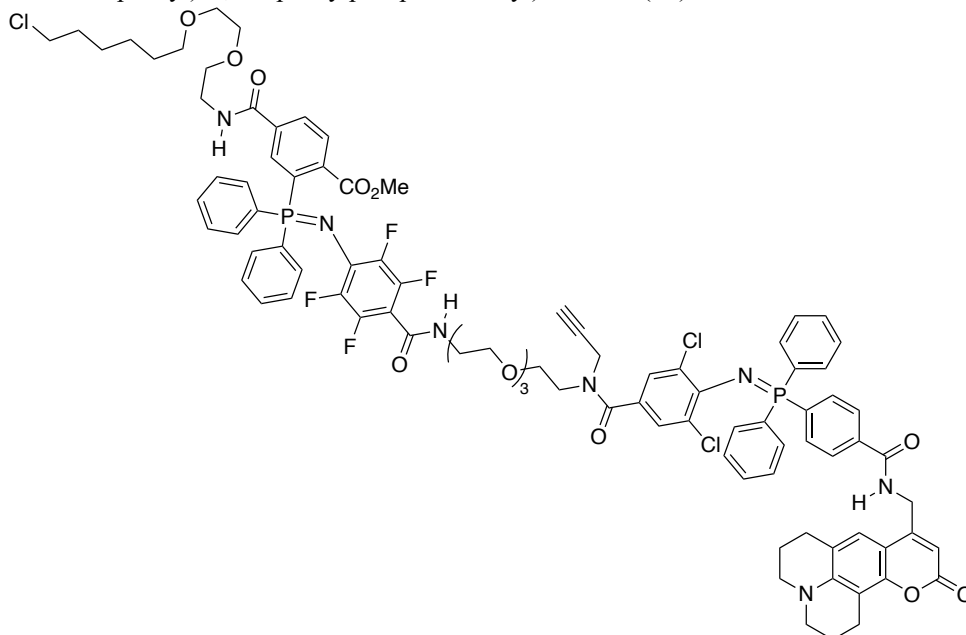

Yellow solid; TLC  $R_f$  0.22 ( $\text{CH}_2\text{Cl}_2/\text{MeOH} = 20/1$ ); Mp 98–100 °C;  $^1\text{H}$  NMR ( $\text{CDCl}_3$ , 400 MHz):  $\delta$  1.20–1.44 (m, 4H), 1.48–1.58 (m, 2H), 1.66–1.76 (m, 2H), 1.82–1.95 (m, 4H), 1.96–2.33 (br, 3H), 2.66–2.74 (m, 4H), 3.15–3.25 (m, 4H), 3.29 (s, 3H), 3.38–3.44 (m, 4H), 3.45–3.67 (m, 21H), 4.12–4.32 (br, 2H), 4.64 (d, 2H,  $J = 5.6$  Hz), 5.92 (s, 1H), 6.80–6.88 (br, 1H), 7.01 (s, 1H), 7.25–7.34 (m, 2H), 7.39–7.56 (m, 12H), 7.65–7.87 (m, 12H), 7.91–7.96 (m, 2H), 7.97–8.02 (m, 1H), 8.13–8.20 (s, 1H);  $^{13}\text{C}\{^1\text{H}\}$  NMR ( $\text{CDCl}_3$ , 101 MHz):  $\delta$  14.0, 20.2, 20.4, 21.3, 22.6, 25.2, 26.5, 27.6, 29.2, 31.5, 32.4, 39.6–40.0 (m), 44.9, 49.3, 49.8, 50.6, 52.2, 69.4–71.2 (m), 105.6, 106.6 (d,  $J = 2.8$  Hz), 127.1–137.9 (m), 145.9, 151.0, 152.3, 160.1, 162.7, 165.5, 166.6, 166.8;  $^{19}\text{F}\{^1\text{H}\}$  NMR ( $\text{CDCl}_3$ , 377 MHz):  $\delta$  -152.4–-152.1 (2F, m), -145.9–-145.6 (2F, m);  $^{31}\text{P}$  NMR ( $\text{CDCl}_3$ , 162 MHz):  $\delta$  1.0 (1P, m), 11.1 (1P, m); HPLC analysis:  $R_t = 34.7$  min [column: Shiseido CAPCELL PAK MG II (4.6 mm i.d.  $\times$  250 mm); mobile phase:  $\text{MeOH}:\text{H}_2\text{O} = 40:60$  (0–5 min), linear gradient from 40:60 to 99:1 (5–30 min), 99:1 (30–50 min); flow rate: 1.00 mL/min; detection: UV at 254 nm]; FL (MeOH)  $\lambda_{\text{max}} = 525$  nm; IR ( $\text{NaCl}$ ,  $\text{cm}^{-1}$ ) 1118, 1265, 1312, 1437, 1517, 1521, 1532, 1540, 1646, 1653, 2865, 2935; HRMS (ESI)  $m/z$ :  $[\text{M} + \text{Na}]^+$  Calcd for  $\text{C}_{91}\text{H}_{90}^{35}\text{Cl}_3\text{F}_4\text{N}_7\text{NaO}_{13}\text{P}_2^+$  1754.4971; Found 1754.4973.

Methyl 4-((2-(2-((6-chlorohexyl)oxy)ethoxy)ethyl)carbamoyl)-2-(*N*-(4-((1-(3,5-dichloro-4-(((4-(((11-oxo-2,3,6,7-tetrahydro-1*H*,5*H*,11*H*-pyrano[2,3-*f*]pyrido[3,2,1-*ij*]quinolin-9-yl)methyl)carbamoyl)phenyl)diphenyl- $\lambda^5$ -phosphanylidene)amino)phenyl)-1-oxo-2-((1-(2-(2-(5-(2-oxohexahydro-1*H*-thieno[3,4-*d*]imidazol-4-yl)pentanamido)ethoxy)ethyl)-1*H*-1,2,3-triazol-4-yl)methyl)-5,8,11-trioxa-2-azatridecan-13-yl)carbamoyl)-2,3,5,6-tetrafluorophenyl)-*P,P*-diphenylphosphorimidoyl)benzoate (**23**)

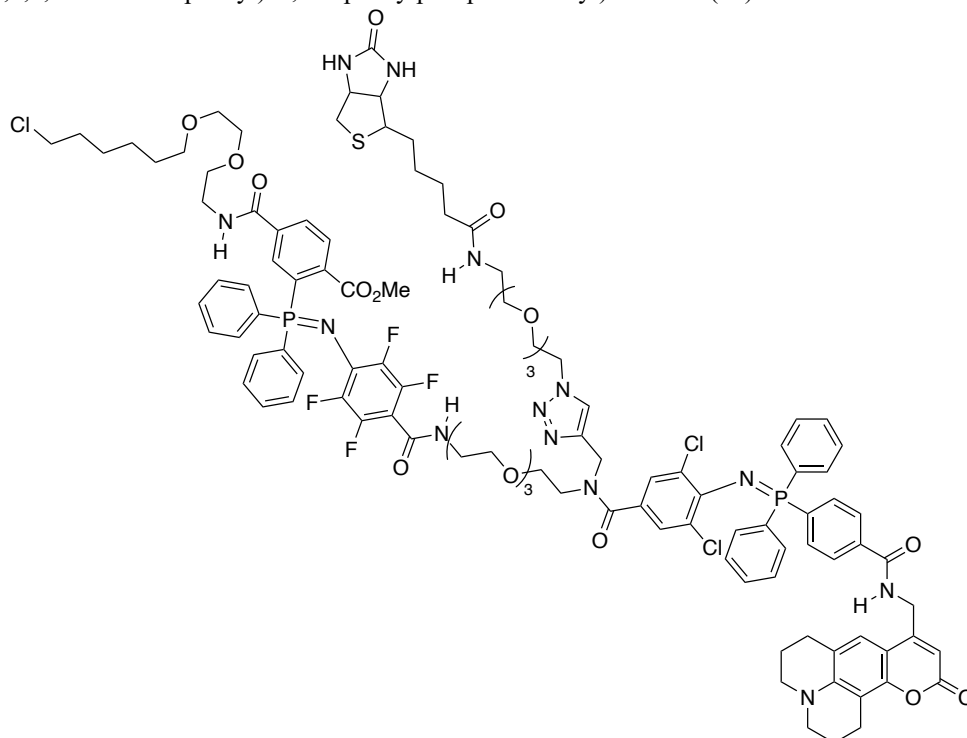

Brown oil; TLC  $R_f$  0.34 ( $\text{CH}_2\text{Cl}_2/\text{MeOH} = 10/1$ );  $^1\text{H}$  NMR ( $\text{CDCl}_3$ , 400 MHz):  $\delta$  0.80–0.94 (m, 4H), 1.20–2.25 (m, 28H), 2.61–2.92 (m, 8H), 3.02–3.16 (m, 2H), 3.20–3.71 (m, 33H), 3.83 (t, 2H,  $J = 4.8$  Hz), 4.18–4.32 (m, 2H), 4.36–4.42 (m, 1H), 4.44–4.52 (m, 2H), 4.64–4.73 (m, 4H), 5.20 (s, 1H), 5.95 (s, 1H), 5.99 (s, 1H), 6.11 (s, 1H), 6.60 (t, 1H,  $J = 4.9$  Hz), 7.06 (s, 1H), 7.31 (d, 2H,  $J = 1.2$  Hz), 7.41–7.95 (m, 25H), 7.99–8.04 (m, 1H), 8.12–8.19 (m, 1H), 8.29–8.35 (m, 1H);  $^{13}\text{C}\{^1\text{H}\}$  NMR ( $\text{CDCl}_3$ , 101 MHz):  $\delta$  25.3, 26.6, 27.7, 28.0, 29.4, 29.7, 32.4, 39.1, 39.9, 45.0, 49.9, 50.6, 52.3, 55.3, 60.0, 61.7, 69.4, 69.5, 69.9, 70.0, 70.2, 70.4, 70.6, 71.2, 118.2, 128.4, 128.5, 128.6, 128.8, 131.0, 131.8, 131.9, 132.1, 132.5, 132.6, 162.6;  $^{19}\text{F}\{^1\text{H}\}$  NMR ( $\text{CDCl}_3$ , 377 MHz):  $\delta$  -152.6–-152.2 (2F, m), -145.9–-145.6 (2F, m);  $^{31}\text{P}$  NMR ( $\text{CDCl}_3$ , 162 MHz):  $\delta$  1.2 (1P, m), 11.1 (1P, m); HPLC analysis:  $R_t = 33.3$  min [column: Shiseido CAPCELL PAK MG II (4.6 mm i.d.  $\times$  250 mm); mobile phase:  $\text{MeOH}:\text{H}_2\text{O} = 40:60$  (0–5 min), linear gradient from 40:60 to 99:1 (5–30 min), 99:1 (30–50 min); flow rate: 1.00 mL/min; detection: UV at 254 nm]; FL (MeOH)  $\lambda_{\text{max}} = 525$  nm; IR (NaCl,  $\text{cm}^{-1}$ ) 984, 1294, 1296, 1457, 1507, 1663, 1700; HRMS (ESI)  $m/z$ :  $[\text{M} + \text{Na}]^+$  Calcd for  $\text{C}_{109}\text{H}_{122}^{35}\text{Cl}_3\text{F}_4\text{N}_{13}\text{NaO}_{18}\text{P}_2\text{S}^+$  2198.7126; Found 2198.7133.

### HPLC Charts. (A) 16 (B) S2 (C) S4 (D) 23

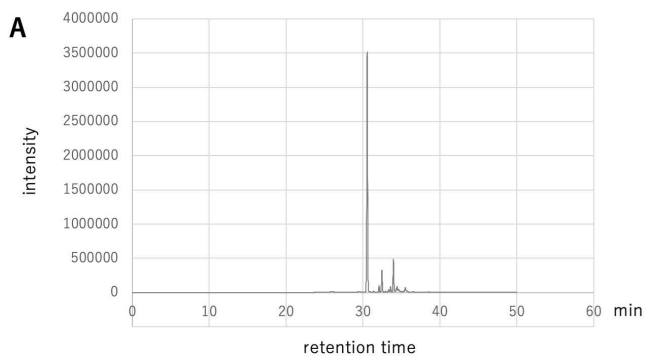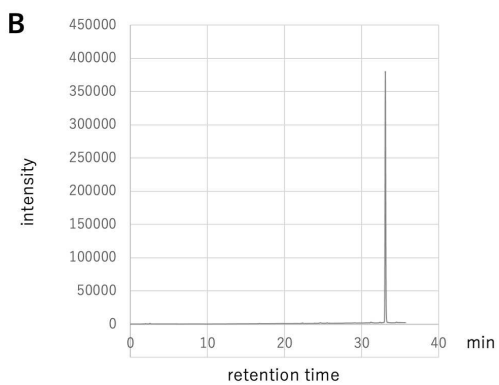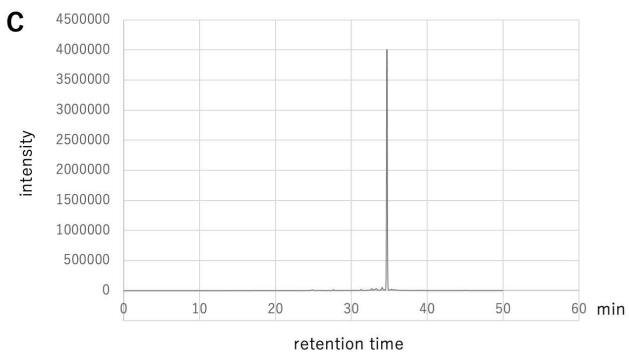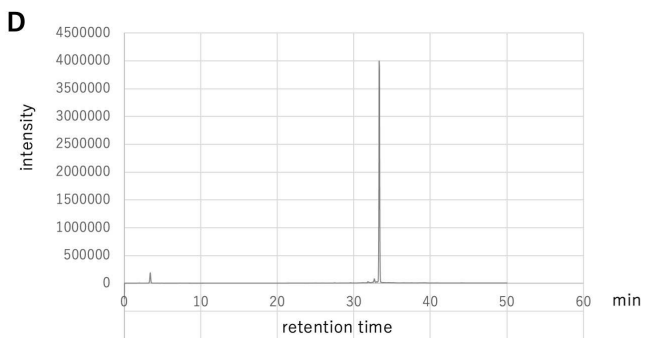

**References for the Supporting Information**

- S1 M. Yamashina, H. Suzuki, N. Kishida, M. Yoshizawa, S. Toyota, *Angew. Chem., Int. Ed.* **2021**, *60*, 17915.
- S2 O. E. Zubir, I. Barlow, E. Ul-Haq, H. A. Tajuddin, N. H. Williams, G. J. Leggett, *Langmuir* **2013**, *29*, 1083.
- S3 M. Sundhoro, S. Jeon, J. Park, O. Ramström, M. Yan, *Angew. Chem., Int. Ed.* **2017**, *56*, 12117.
- S4 D. Cartagenova, S. Bachmann, K. Püntener, M. Scalone, M. A. Newton, F. A. P. Esteves, T. Rohrbach, P. Zimmermann, J. A. van Bokhoven, M. Ranocchiari, *Catal. Sci. Technol.* **2022**, *12*, 954.
- S5 T. Yokoi, H. Tanimoto, T. Ueda, T. Morimoto, K. Kakiuchi, *J. Org. Chem.* **2018**, *83*, 12103.
- S6 J. Davila, A. Chassepot, J. Longo, F. Boulmedais, A. Reisch, B. Frisch, F. Meyer, J.-C. Voegel, P. J. Mésini, B. Senger, M.-H. Metz-Boutigue, J. Hemmerlé, P. Lavalle, P. Schaaf, L. Jierry, *J. Am. Chem. Soc.* **2011**, *134*, 83.
- S7 C. Uttamapinant, A. Tangpeerachaikul, S. Grecian, S. Clarke, U. Singh, P. Slade, K. R. Gee, A. Y. Ting, *Angew. Chem., Int. Ed.* **2012**, *51*, 5852.
- S8 I. Takashima, K. Kusamori, H. Hakariya, M. Takashima, T. H. Vu, Y. Mizukami, N. Noda, Y. Takayama, Y. Katsuda, S.-i. Sato, Y. Takakura, M. Nishikawa, M. Uesugi, *ACS Chem. Biol.* **2019**, *14*, 775.
- S9 L. Wirtz, D. Auerbach, G. Jung, U. Kazmaier, *Synthesis* **2012**, *44*, 2005.
- S10 M. Tantama, W.-C. Lin, S. Licht, *J. Am. Chem. Soc.* **2008**, *130*, 15766.
- S11 M. Xue, J. Li, J. Peng, Y. Bai, G. Zhang, W. Xiao, G. Lai, *Appl. Organomet. Chem.* **2014**, *28*, 120.
- S12 J.-H. Jia, X.-L. Chen, J.-Z. Liao, D. Liang, M.-X. Yang, R. Yu, C.-Z. Lu, *Dalton Trans.* **2019**, *48*, 1418.
- S13 Z. Fang, M. Cai, Y. Lin, H. Zhao, *Appl. Organomet. Chem.* **2018**, *32*, e4417.
- S14 T. Wang, S. Sang, L. L. Liu, H. Qiao, Y. Gao, Y. Zhao, *J. Org. Chem.* **2013**, *79*, 608.
- S15 S. E. Vaillard, C. Mück-Lichtenfeld, S. Grimme, A. Studer, *Angew. Chem., Int. Ed.* **2007**, *46*, 6533.
- S16 L. Wirtz, U. Kazmaier, *Eur. J. Org. Chem.* **2011**, 7062.

### H and <sup>13</sup>C NMR Spectra of Compounds

<sup>1</sup>H NMR (400 MHz) and <sup>13</sup>C NMR (101 MHz) spectra of 4-azido-*N*-butyl-3,5-dichlorobenzamide (**1a**) (CDCl<sub>3</sub>)

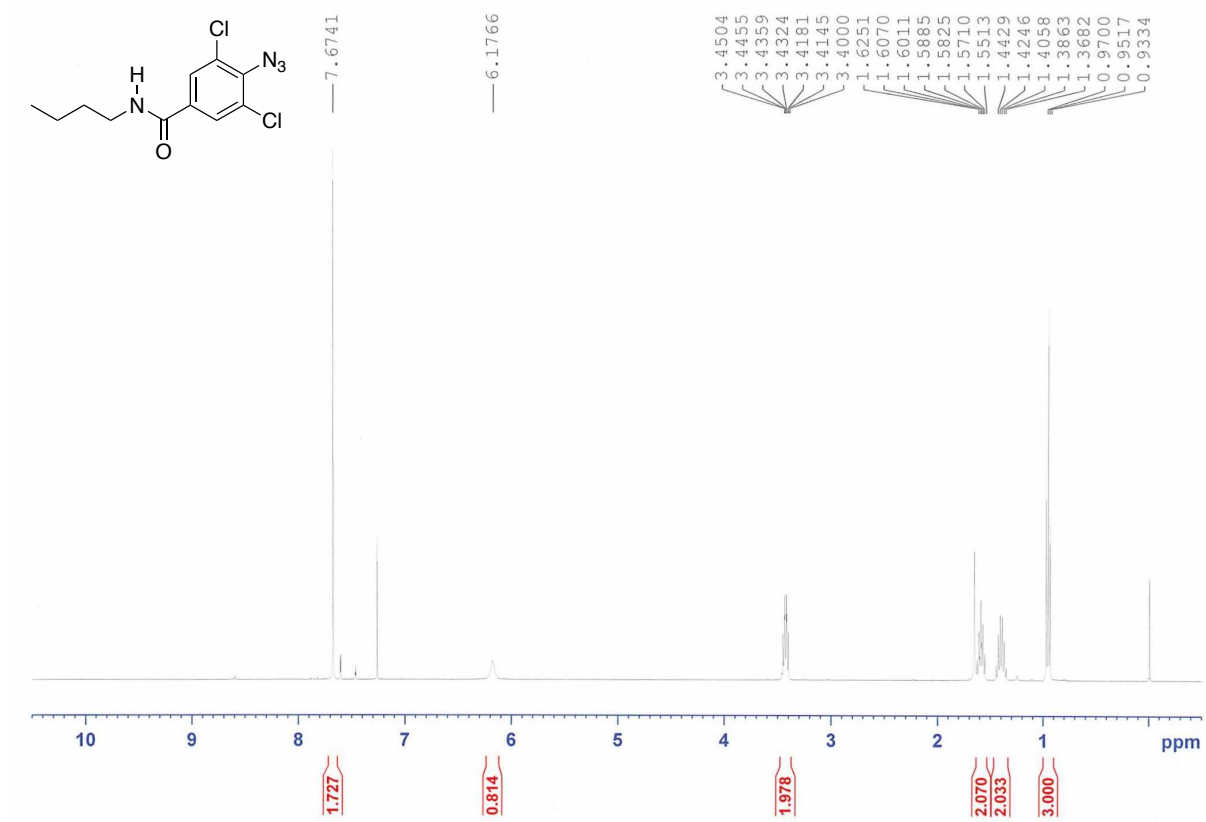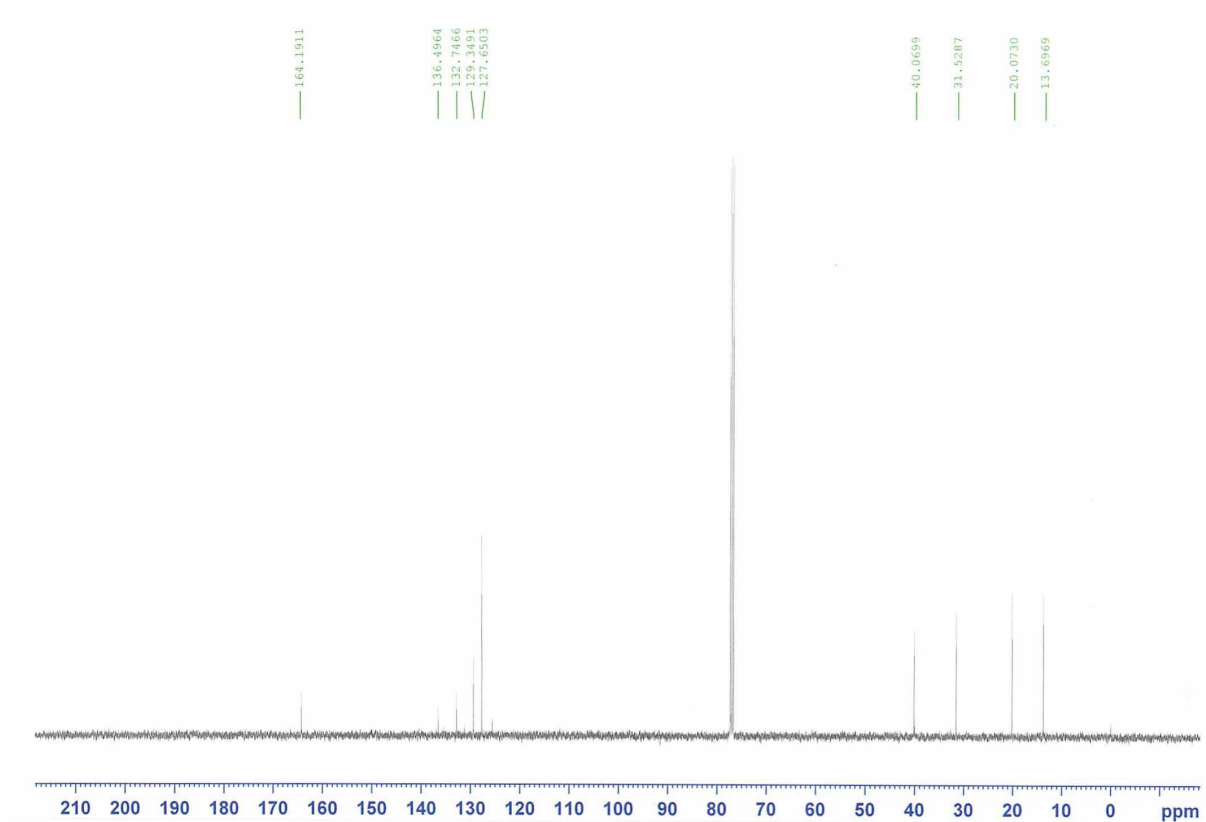



$^1\text{H}$  NMR (400 MHz) and  $^{13}\text{C}$  NMR (101 MHz) spectra of 4-azido-*N*-butyl-2,3,5,6-tetrafluorobenzamide (**2a**) ( $\text{CDCl}_3$ )

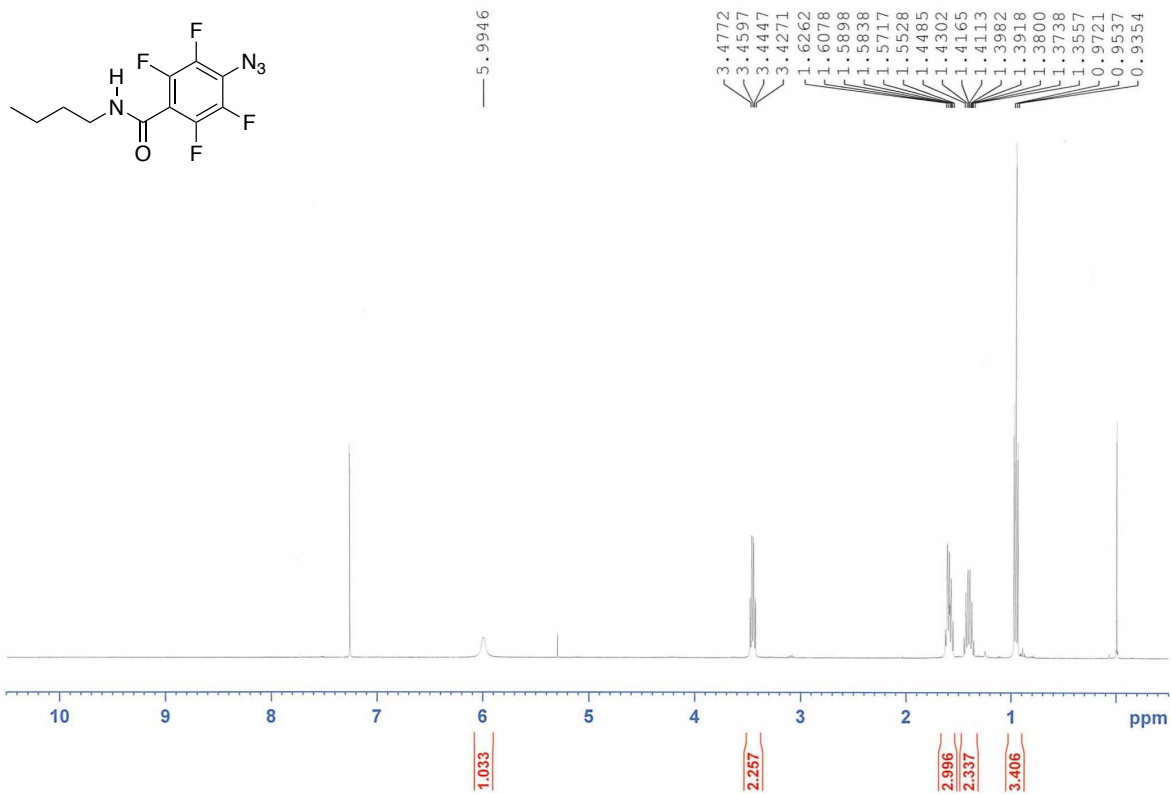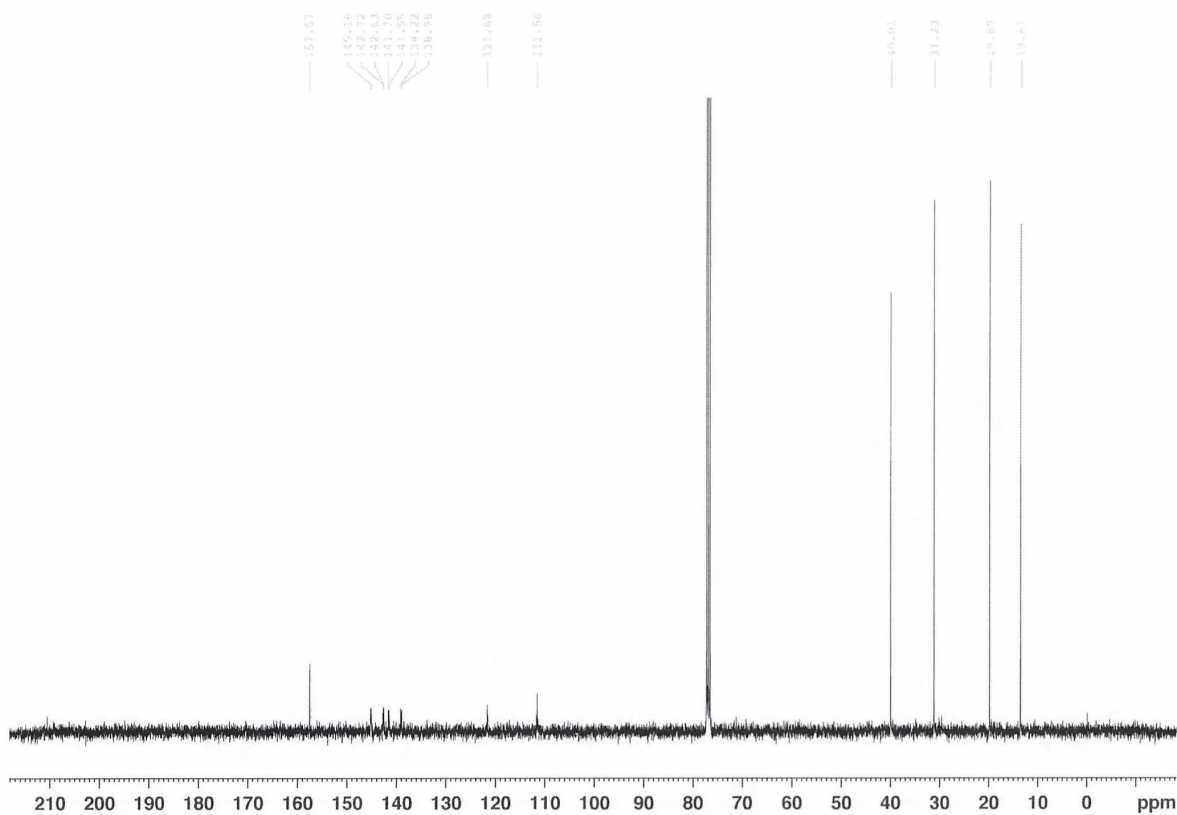

$^1\text{H}$  NMR (400 MHz) and  $^{13}\text{C}$  NMR (101 MHz) spectra of methyl 2-(diphenylphosphaneyl)-5-methoxybenzoate (**3i**) ( $\text{CDCl}_3$ )

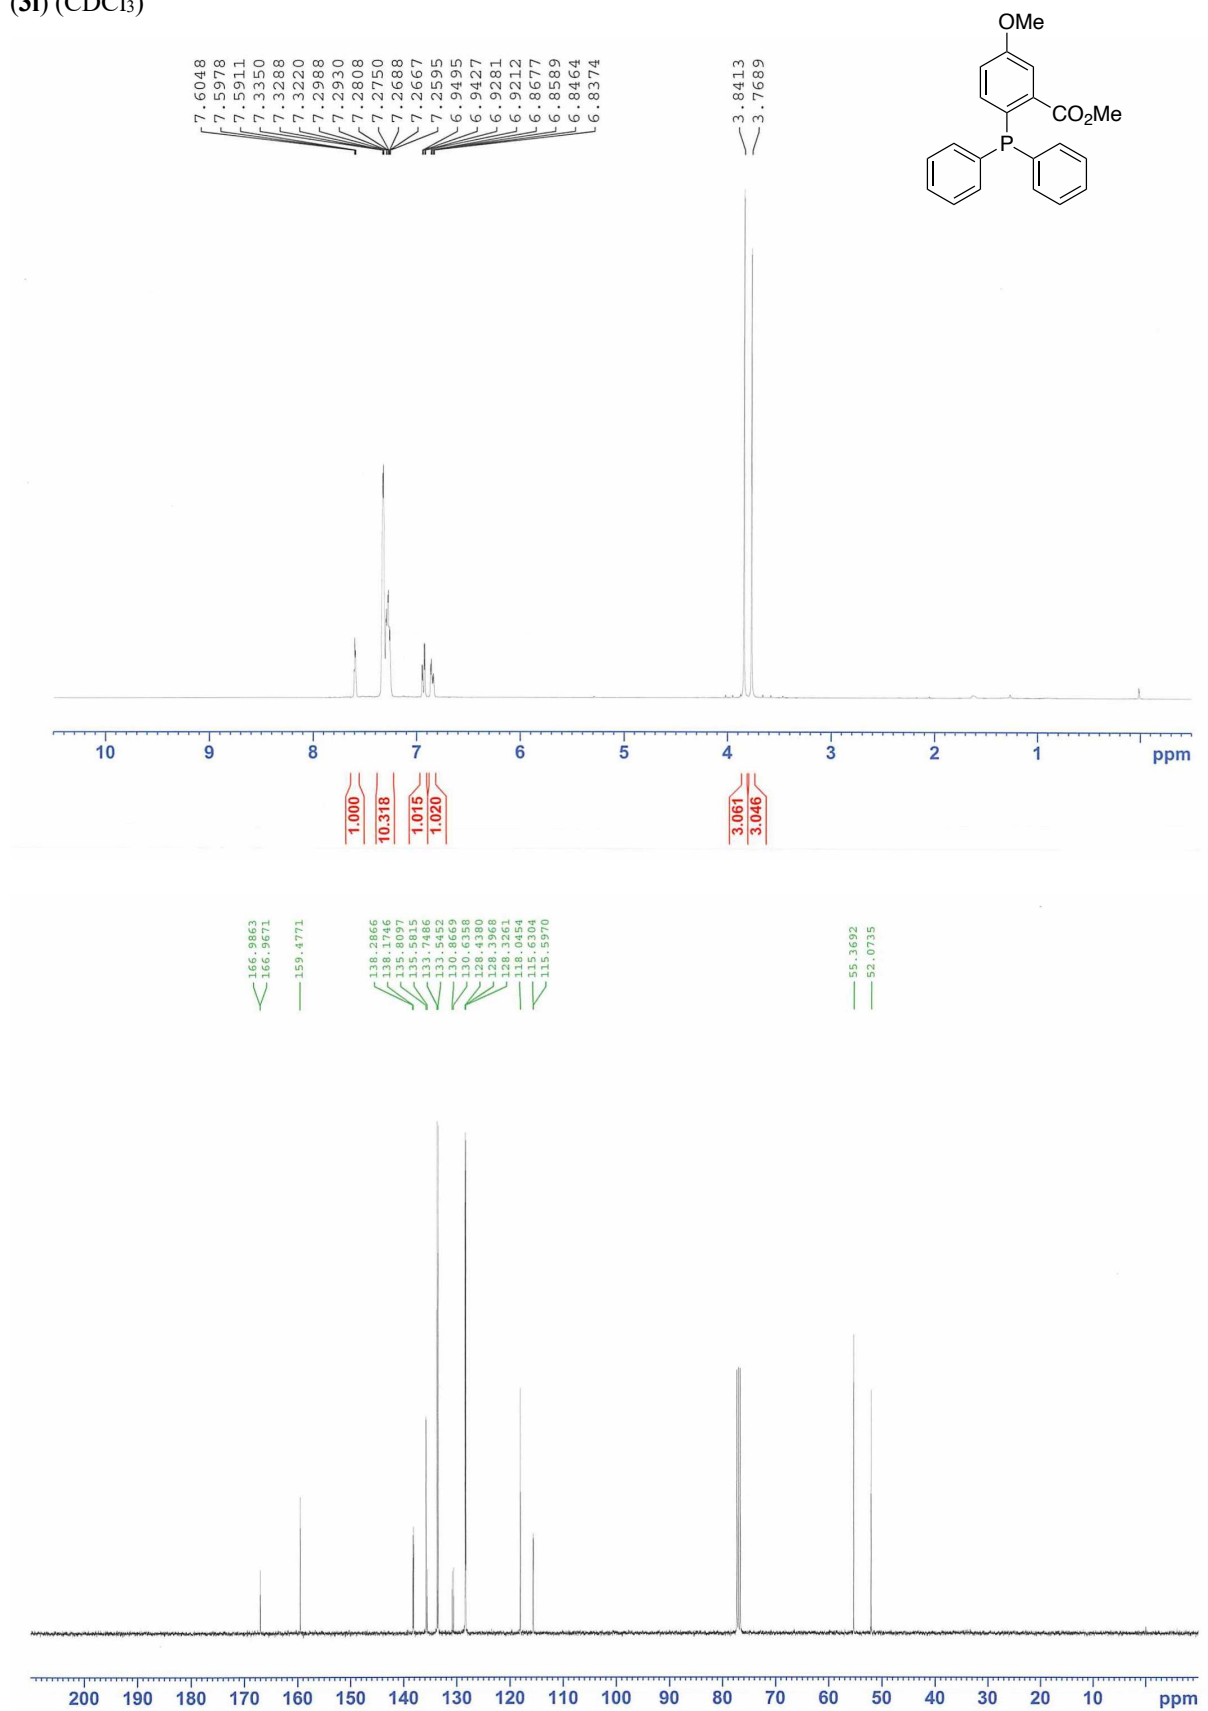

$^1\text{H}$  NMR (400 MHz) and  $^{13}\text{C}$  NMR (101 MHz) spectra of *N*-butyl-3,5-dichloro-4-((triphenyl- $\lambda^5$ -phosphanylidene)amino)benzamide (**4a**) ( $\text{CDCl}_3$ )

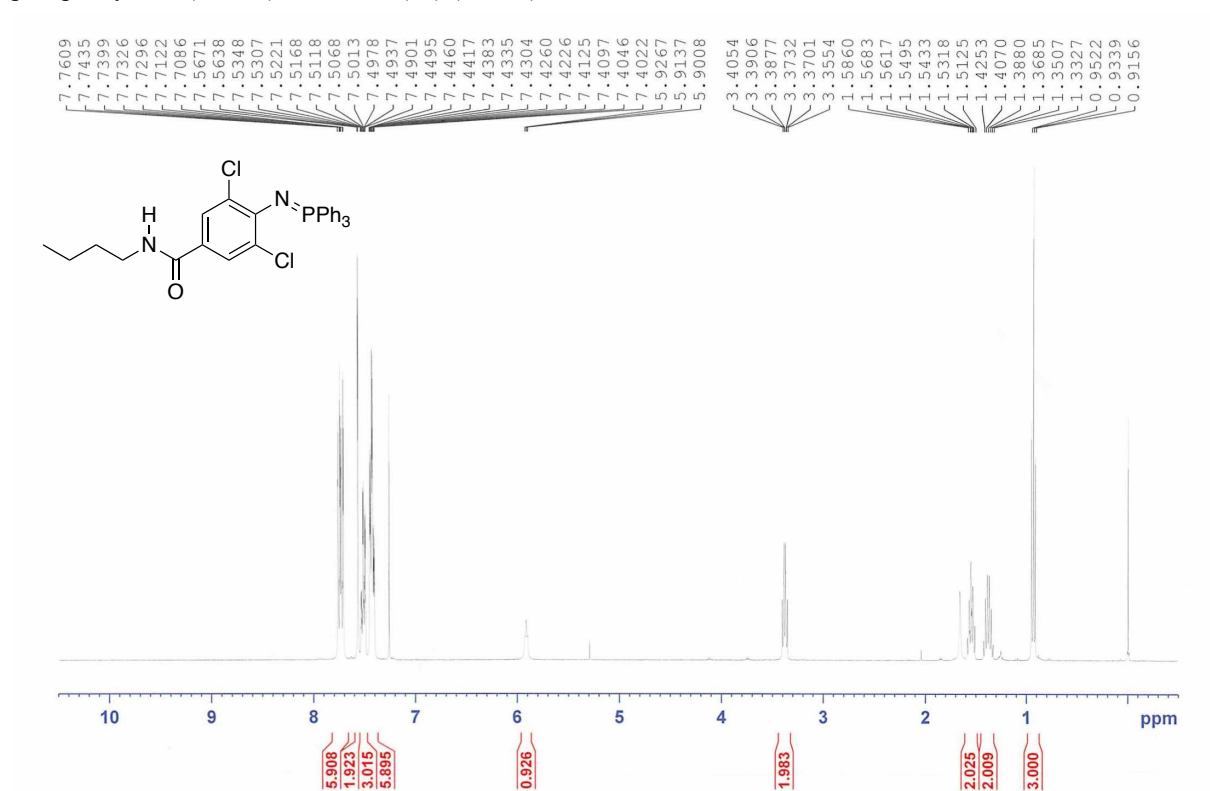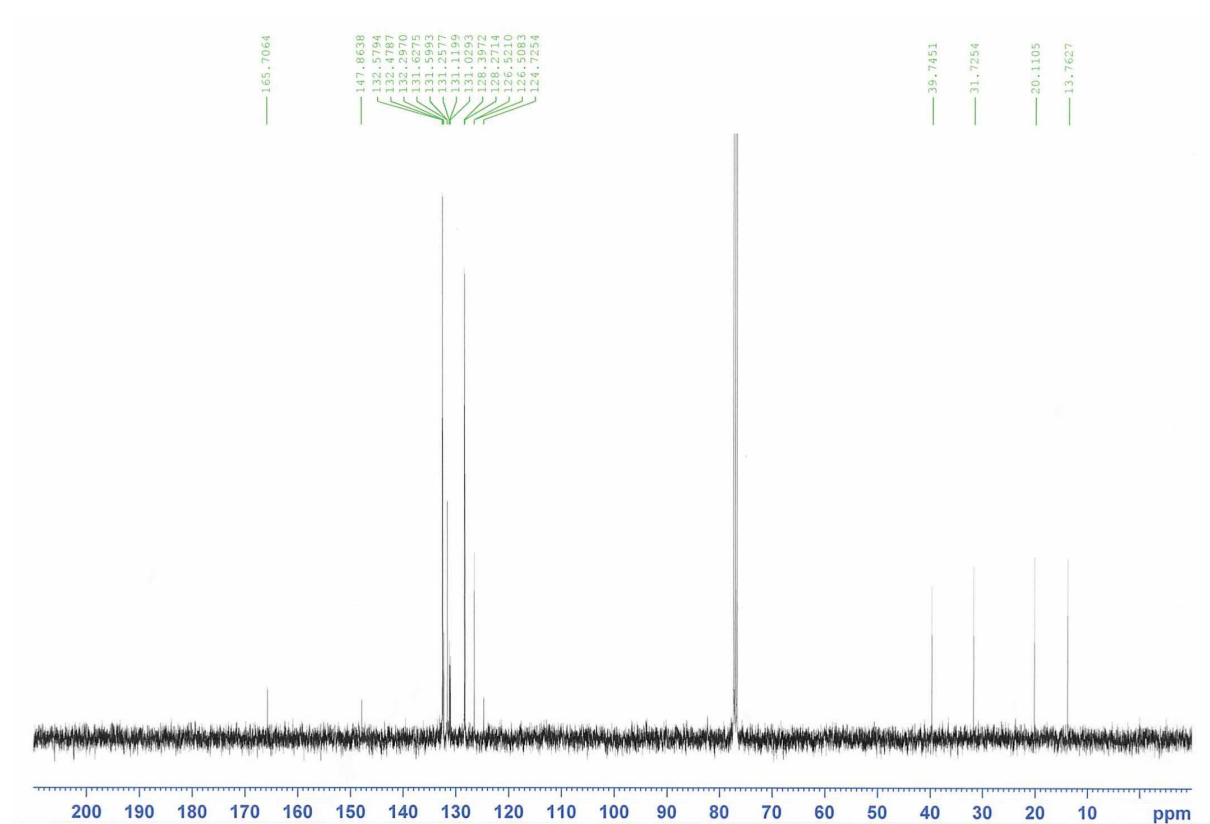

<sup>1</sup>H NMR (400 MHz) and <sup>13</sup>C NMR (101 MHz) spectra of *N*-butyl-3,5-dichloro-4-(((2-methoxyphenyl)diphenyl-λ<sup>5</sup>-phosphanylidene)amino)benzamide (**4c**) (CDCl<sub>3</sub>)

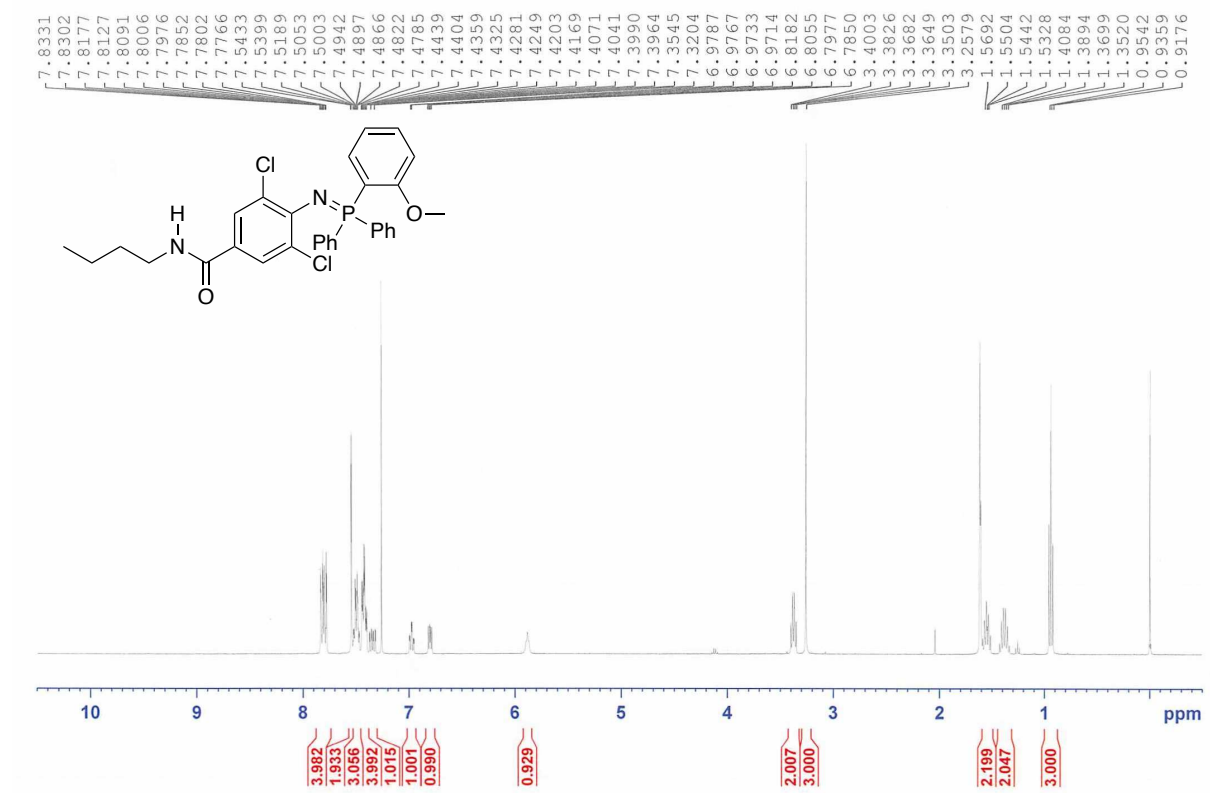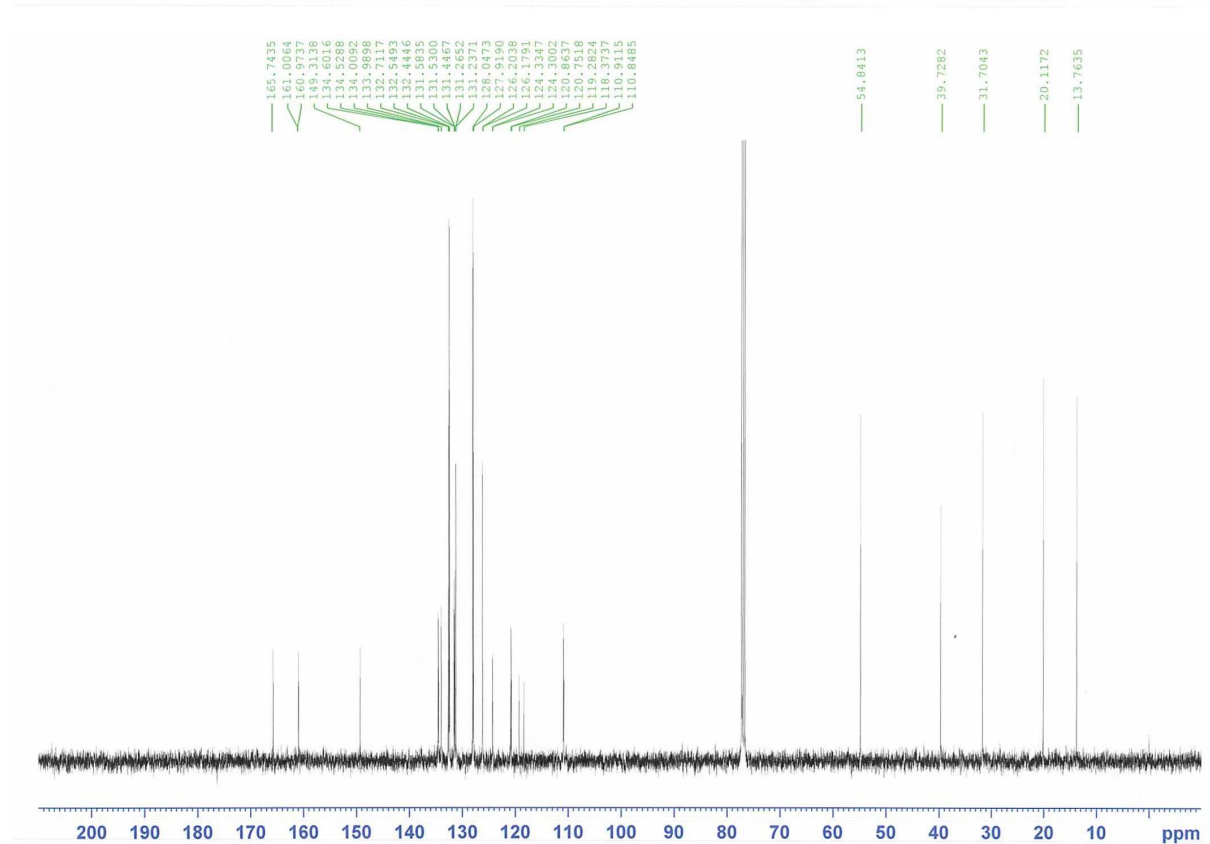

$^1\text{H}$  NMR (400 MHz) and  $^{13}\text{C}$  NMR (101 MHz) spectra of *N*-butyl-3,5-dichloro-4-((diphenyl(*o*-tolyl)- $\lambda^5$ -phosphaenylidene)amino)benzamide (**4d**) ( $\text{CDCl}_3$ )

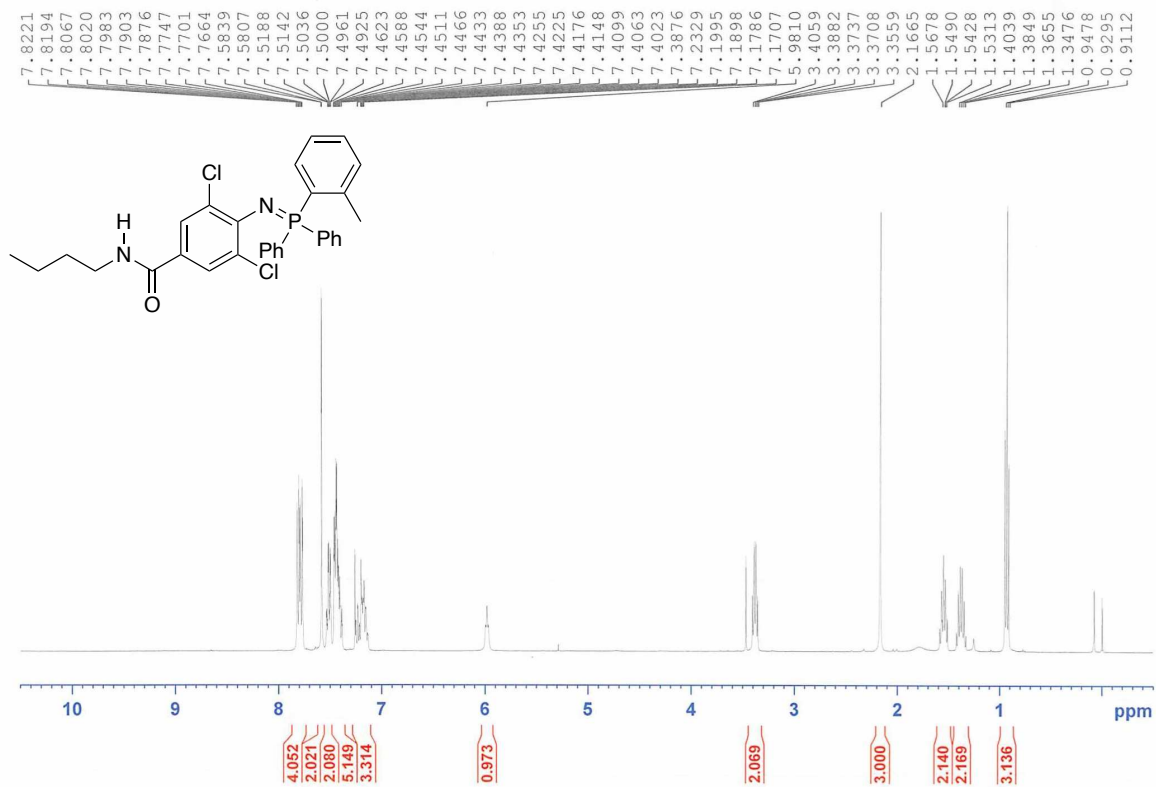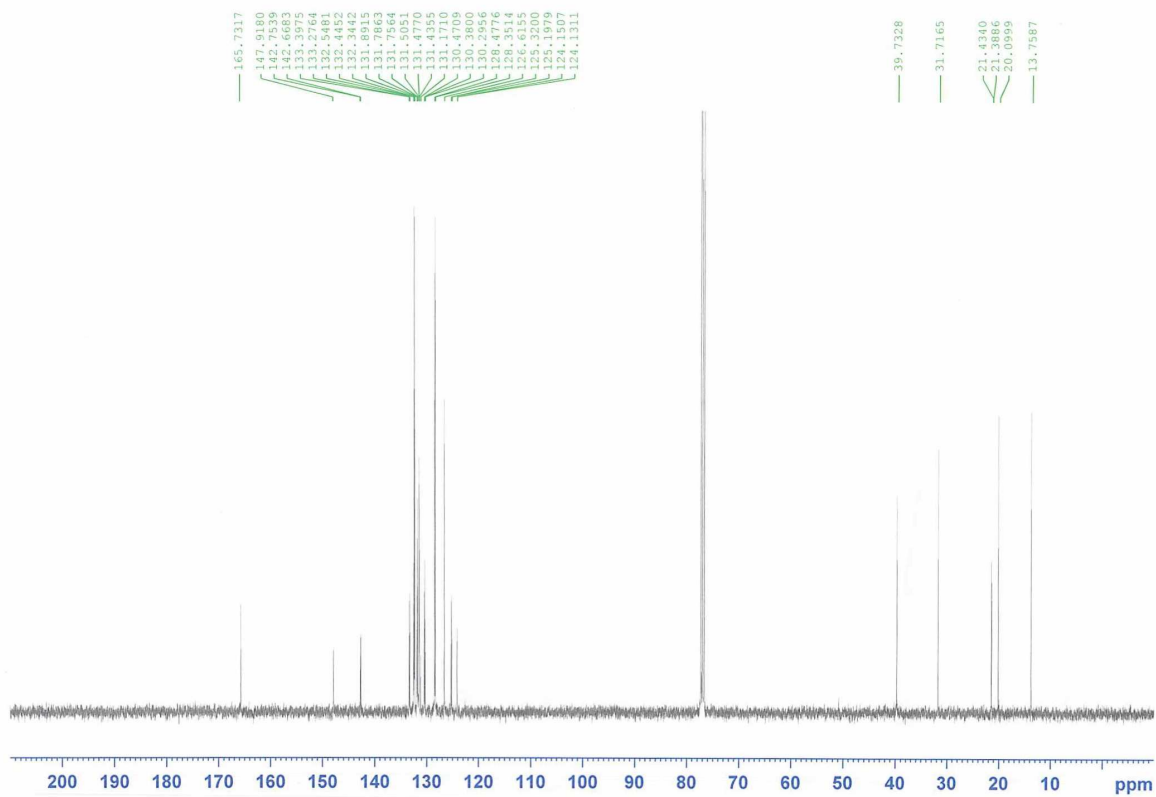

<sup>1</sup>H NMR (400 MHz) and <sup>13</sup>C NMR (101 MHz) spectra of *N*-butyl-3,5-dichloro-4-(((2-fluorophenyl)diphenyl-λ<sup>5</sup>-phosphanylidene)amino)benzamide (**4e**) (CDCl<sub>3</sub>)

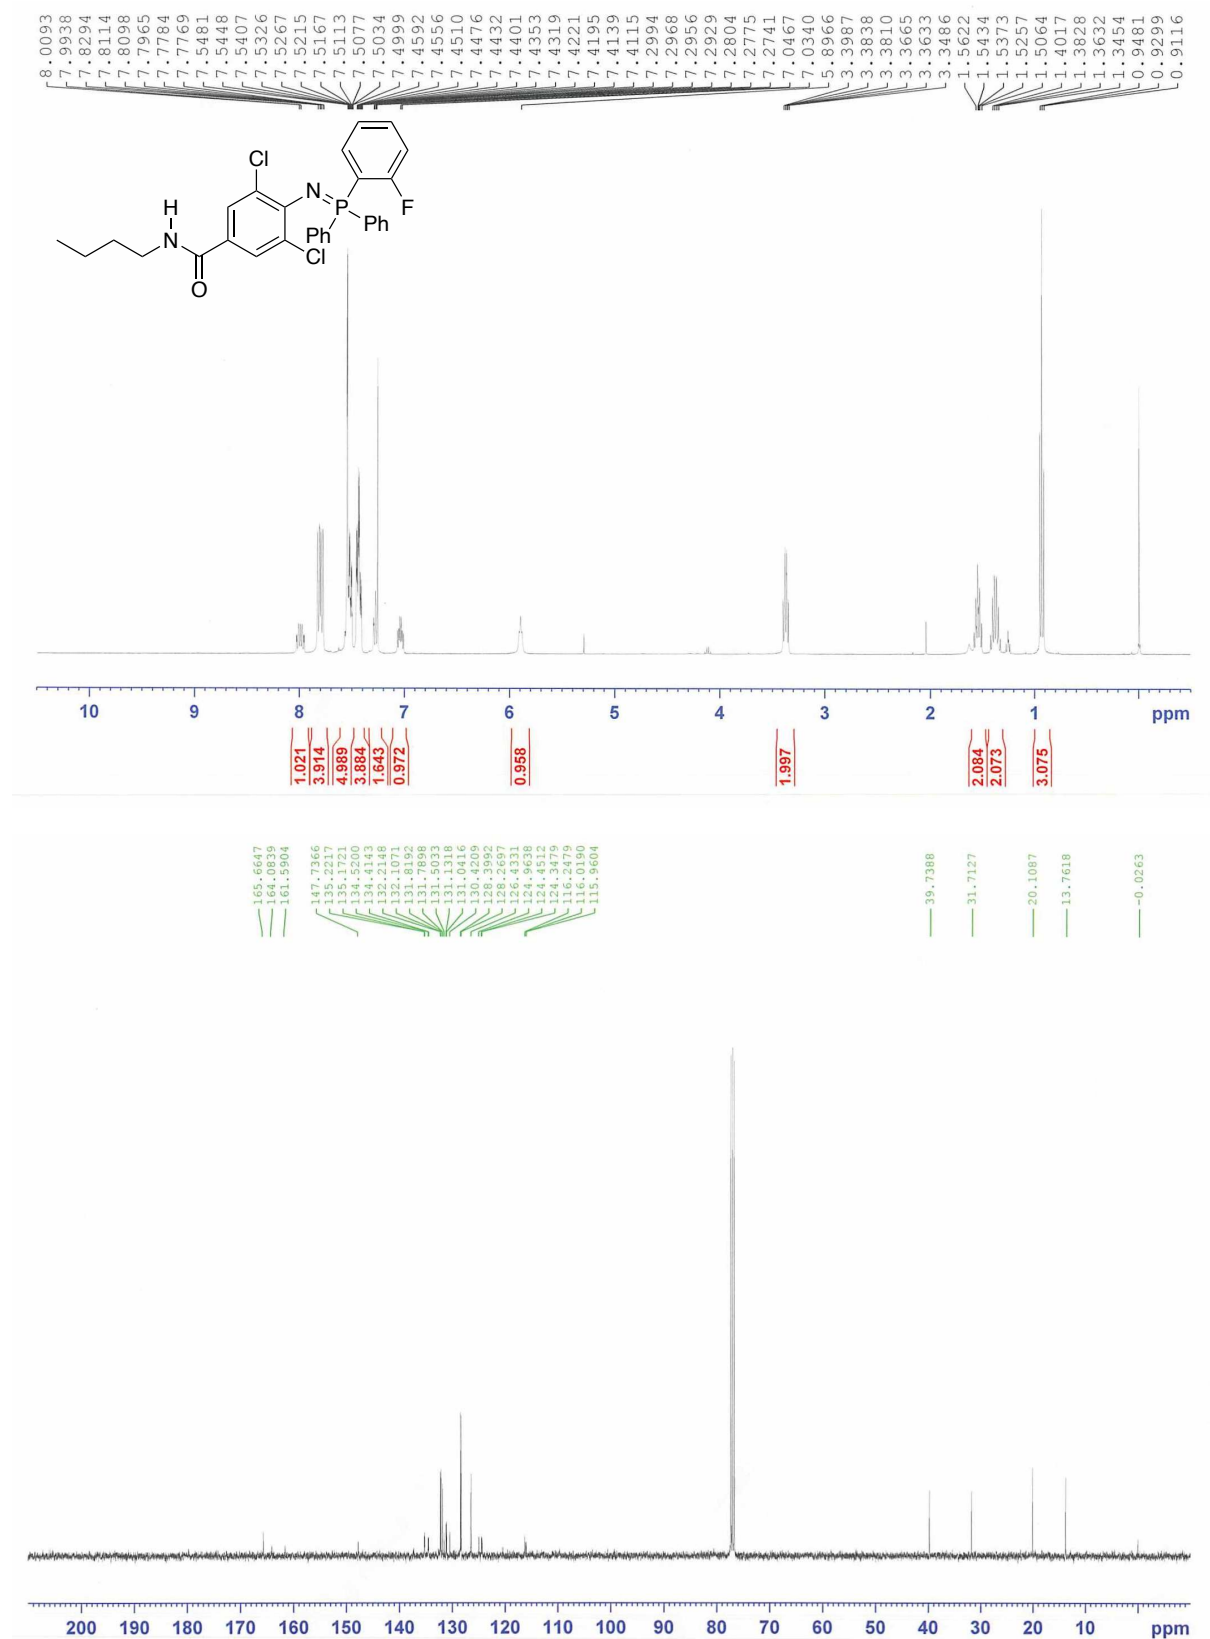

$^1\text{H}$  NMR (400 MHz) and  $^{13}\text{C}$  NMR (101 MHz) spectra of methyl 4-(*N*-(4-(butylcarbamoyl)-2,6-dichlorophenyl)-*P,P*-diphenylphosphorimidoyl)benzoate (**4h**) ( $\text{CDCl}_3$ )

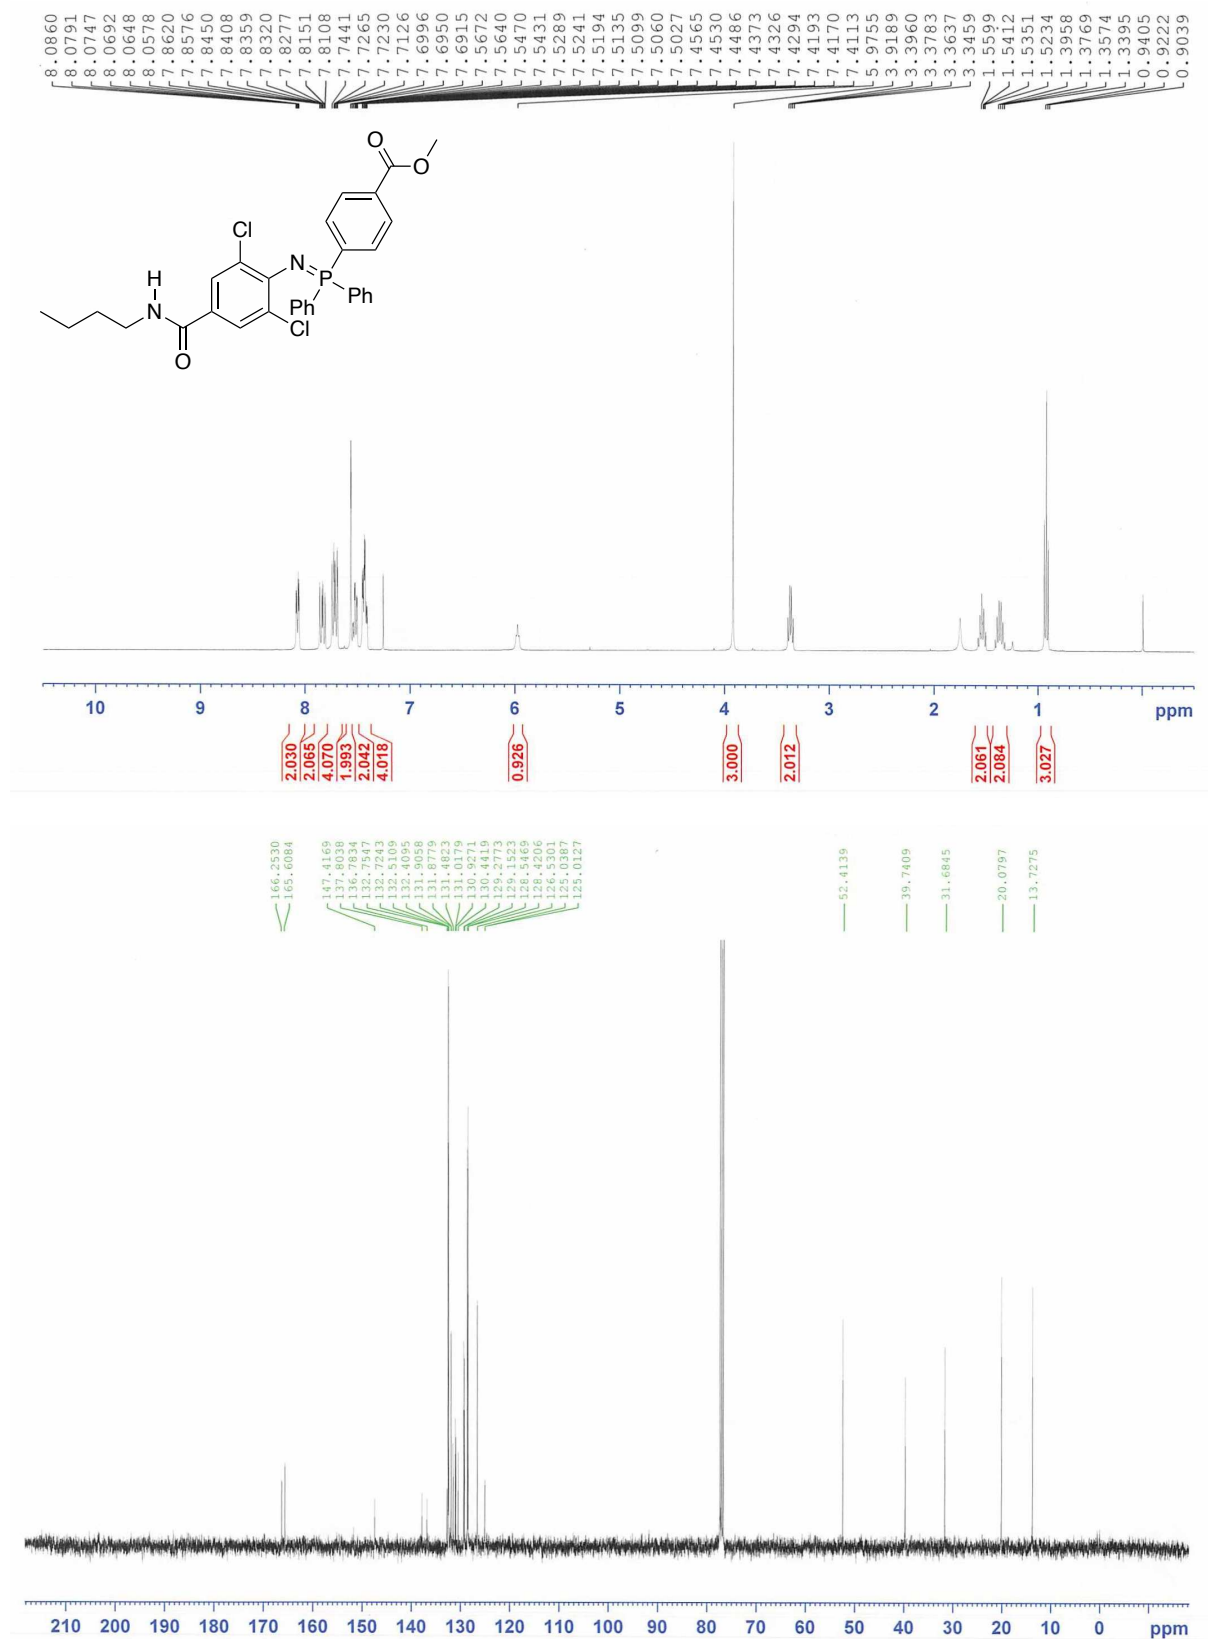

$^1\text{H}$  NMR (400 MHz) and  $^{13}\text{C}$  NMR (101 MHz) spectra of *N*-butyl-2,3,5,6-tetrafluoro-4-((triphenyl- $\lambda^5$ -phosphanylidene)amino)benzamide (**5a**) ( $\text{CDCl}_3$ )

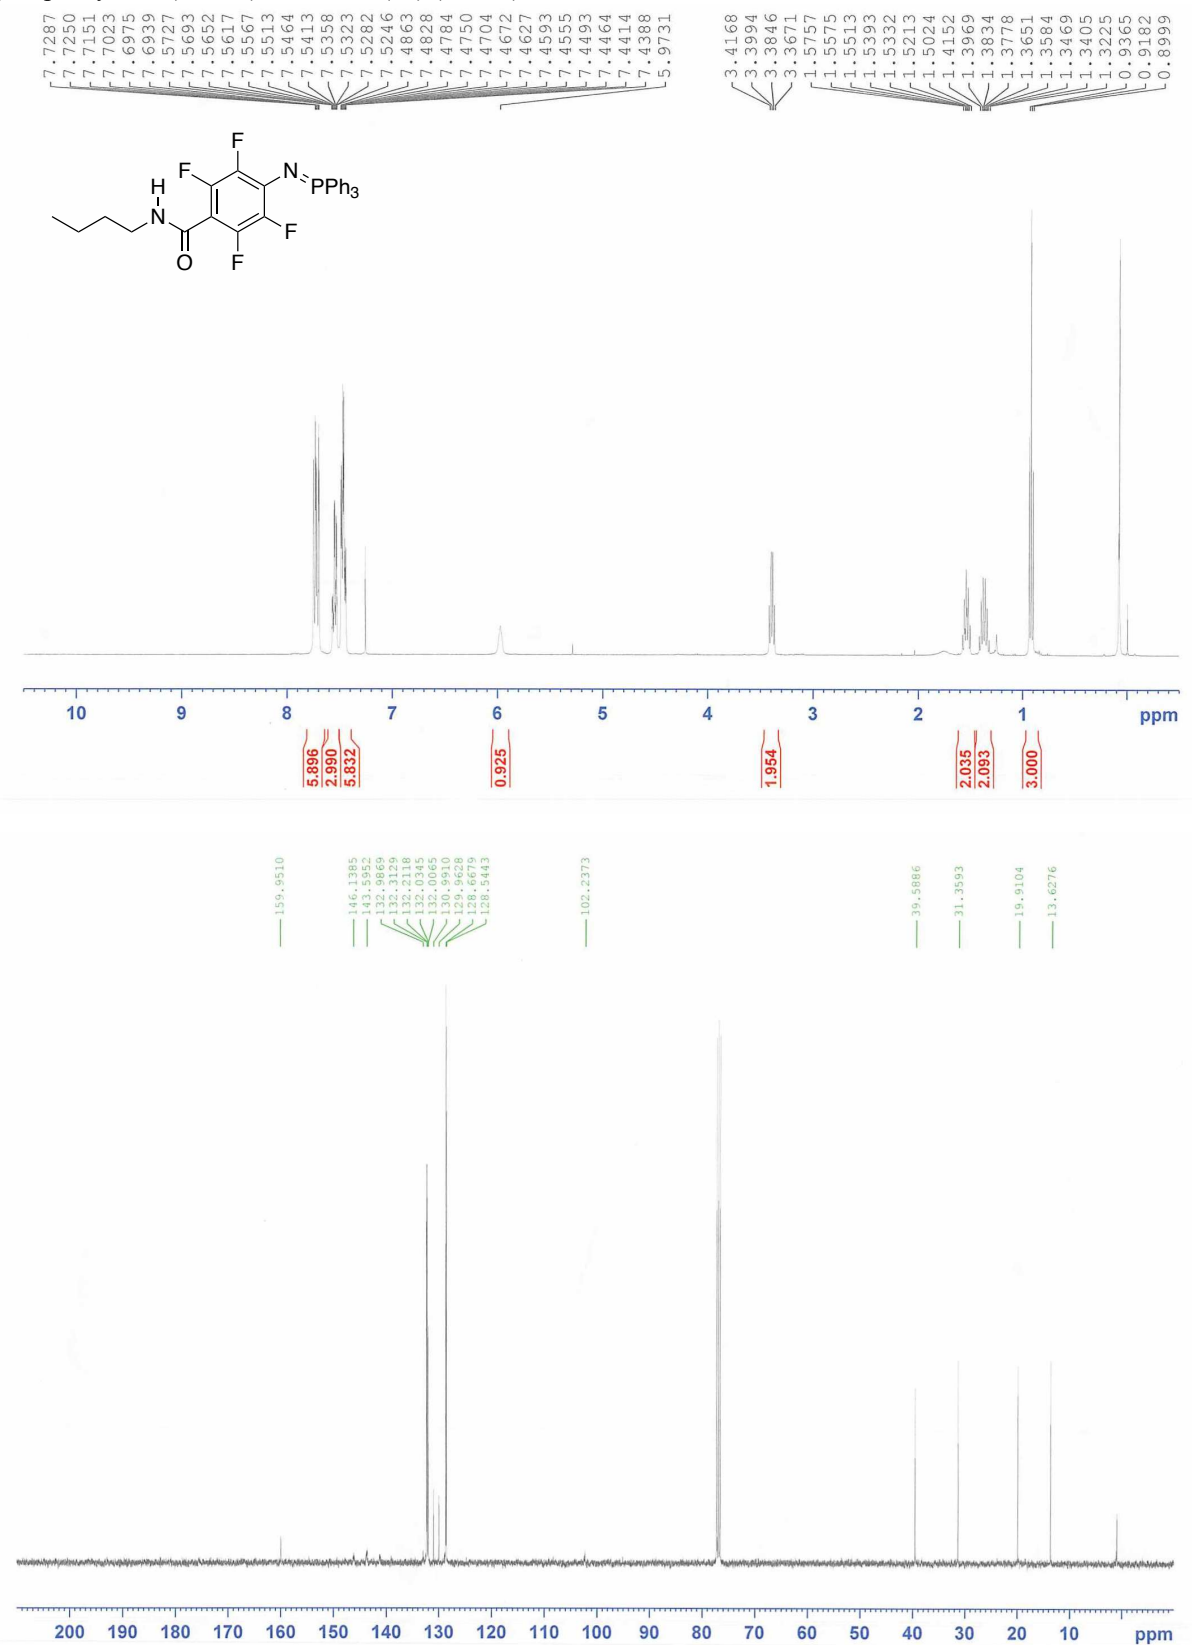



<sup>1</sup>H NMR (400 MHz) and <sup>13</sup>C NMR (101 MHz) spectra of methyl 2-(*N*-(4-(butylcarbamoyl)-2,3,5,6-tetrafluorophenyl)-*P,P*-diphenylphosphorimidoyl)benzoate (**5b**) (CDCl<sub>3</sub>)

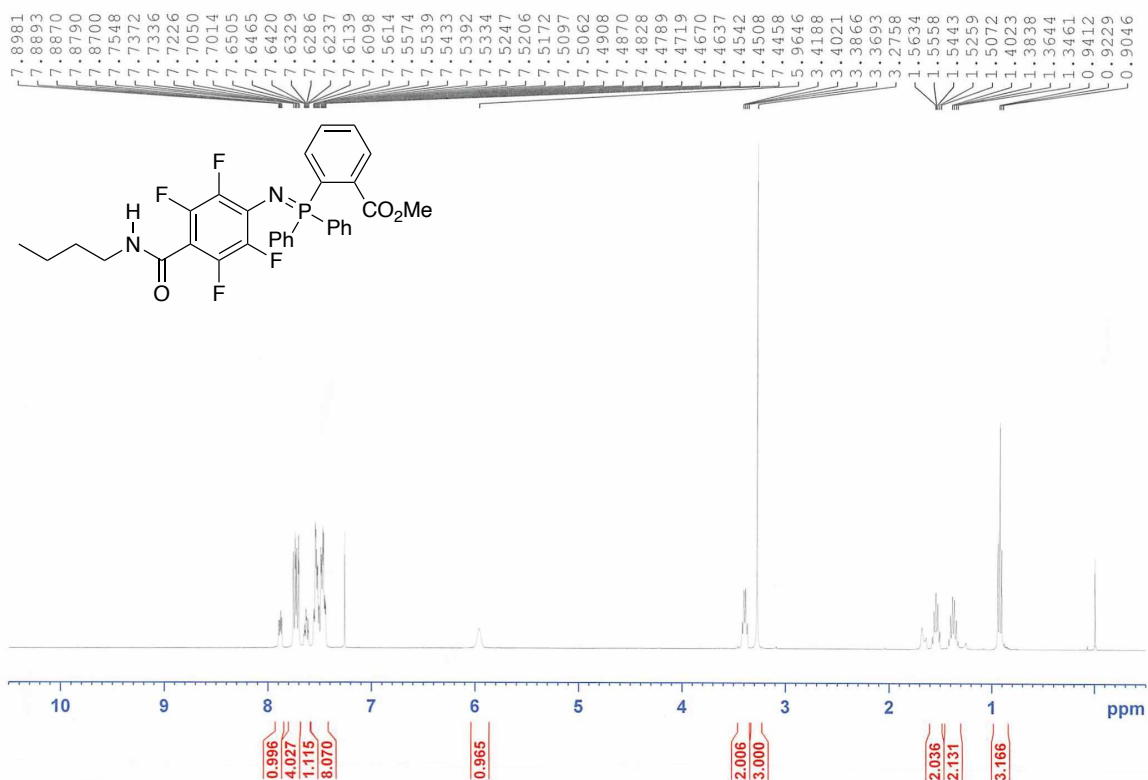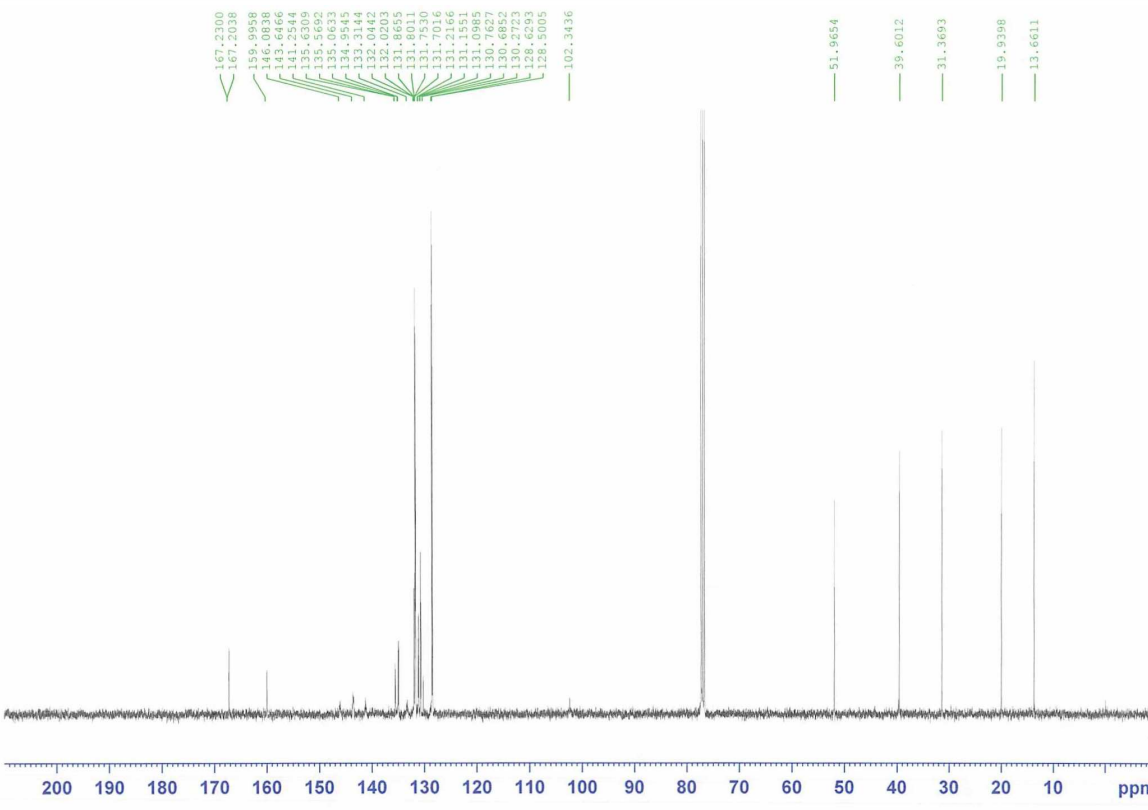

<sup>1</sup>H NMR (400 MHz) and <sup>13</sup>C NMR (101 MHz) spectra of *N*-butyl-2,3,5,6-tetrafluoro-4-(((2-methoxyphenyl)diphenyl-λ<sup>5</sup>-phosphanylidene)amino)benzamide (**5c**) (CDCl<sub>3</sub>)

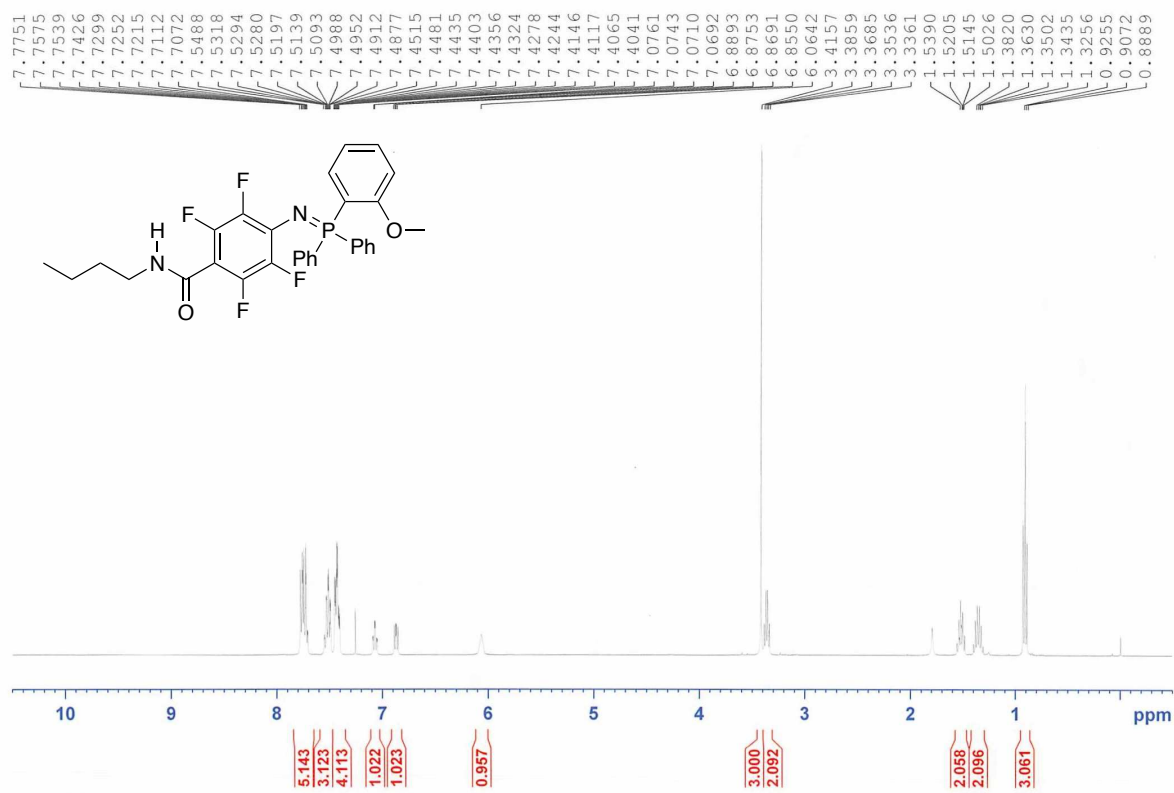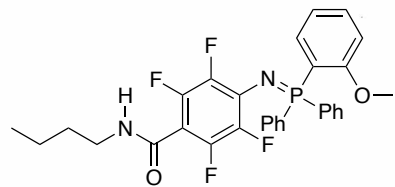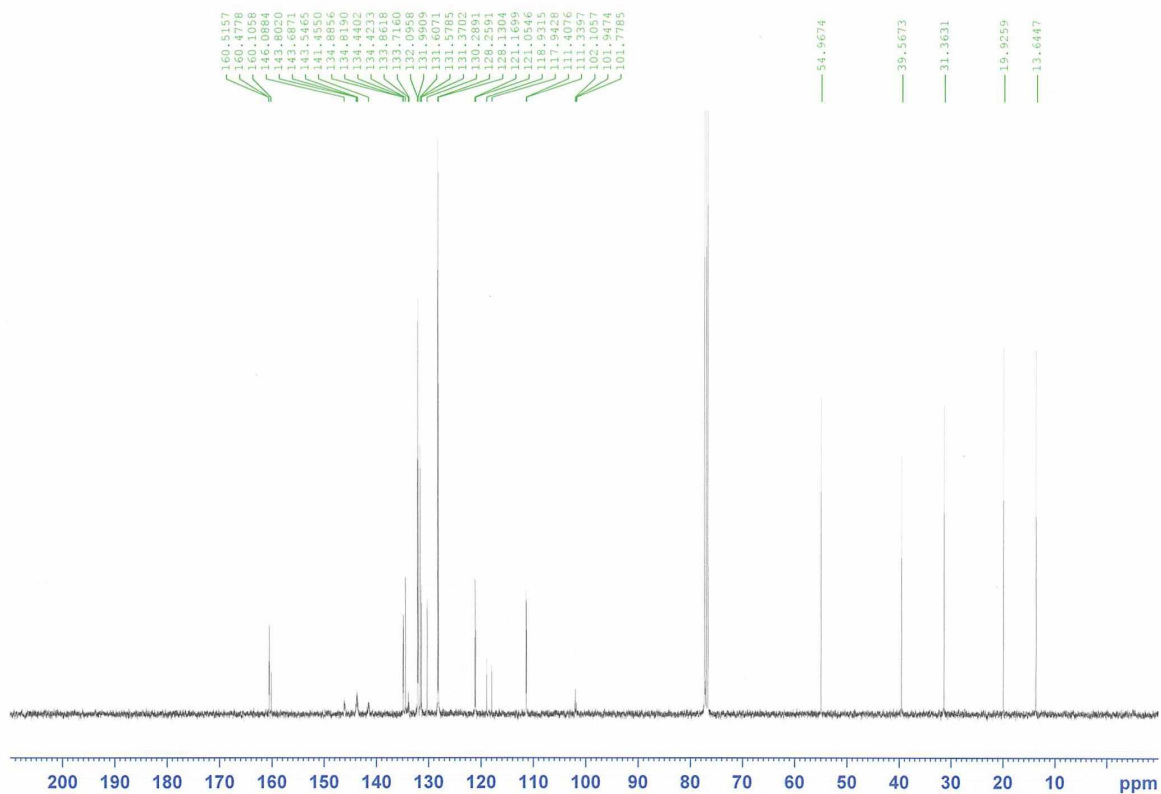

<sup>1</sup>H NMR (400 MHz) and <sup>13</sup>C NMR (101 MHz) spectra of *N*-butyl-4-((diphenyl(*o*-tolyl)-λ<sup>5</sup>-phosphanylidene)amino)-2,3,5,6-tetrafluorobenzamide (**5d**) (CDCl<sub>3</sub>)

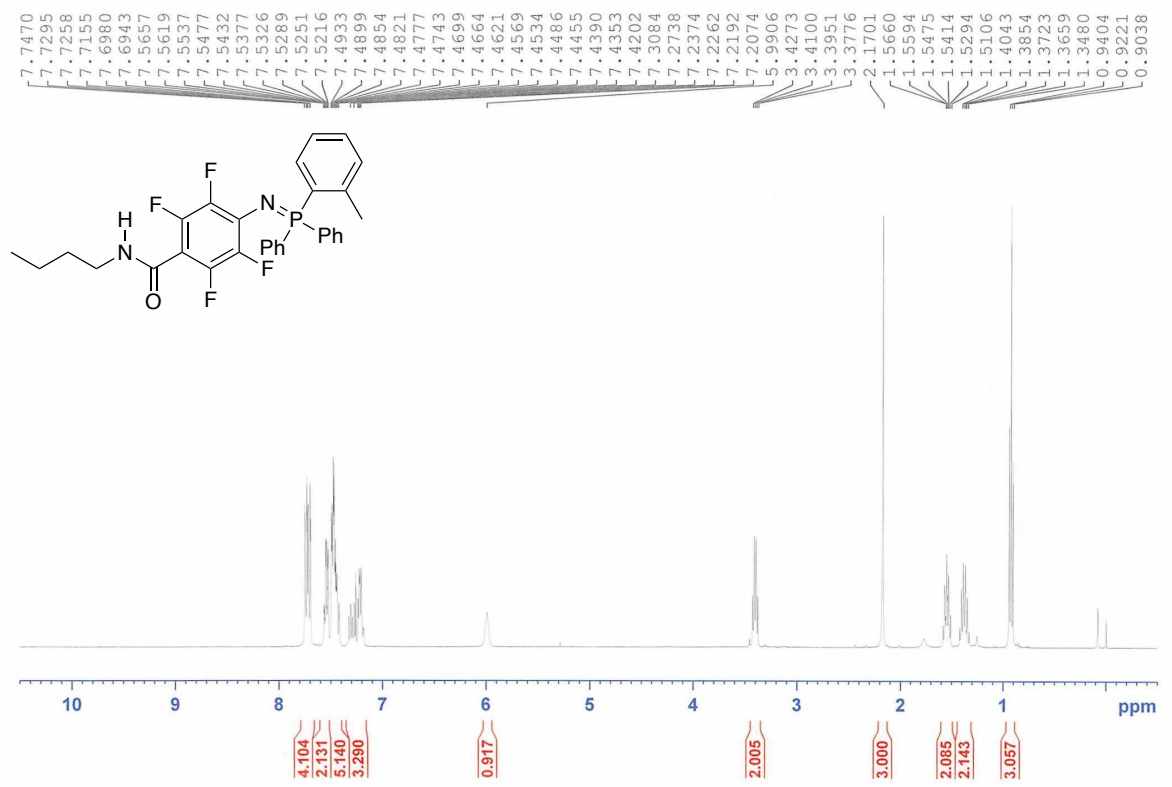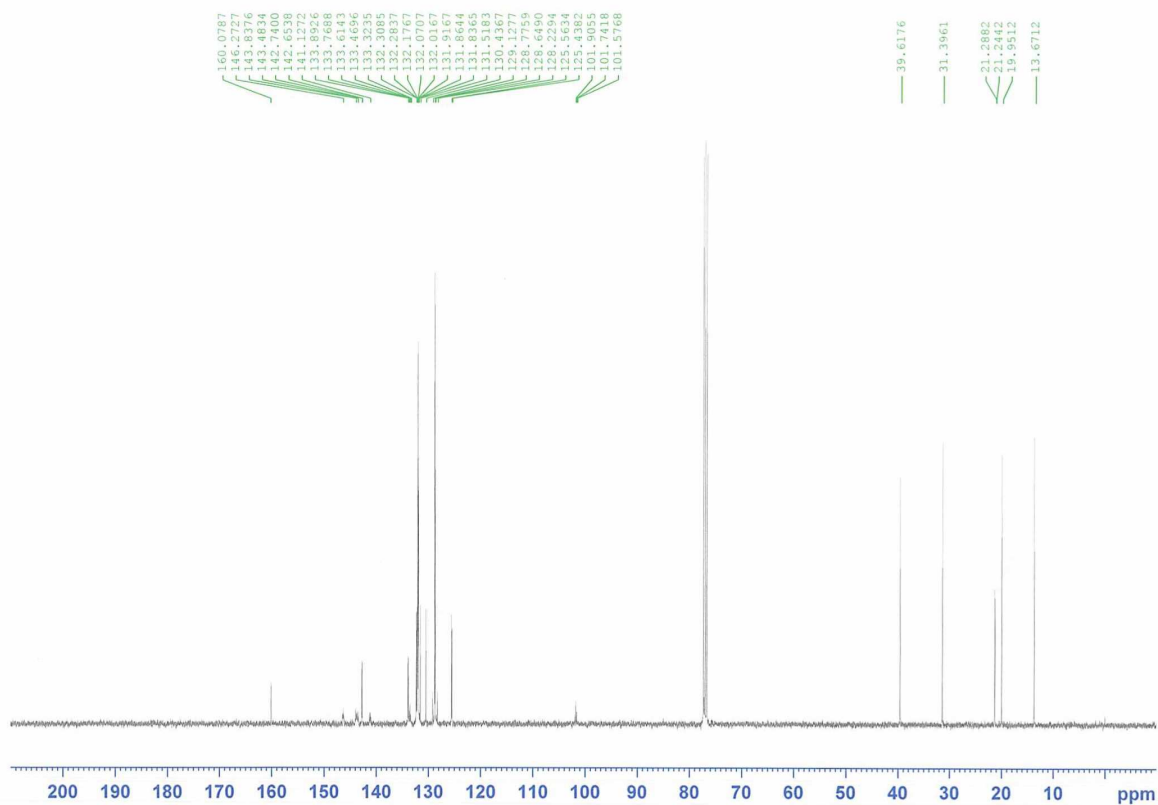

$^1\text{H}$  NMR (400 MHz) and  $^{13}\text{C}$  NMR (101 MHz) spectra of *N*-butyl-2,3,5,6-tetrafluoro-4-(((2-fluorophenyl)diphenyl- $\lambda^5$ -phosphanylidene)amino)benzamide (**5e**) ( $\text{CDCl}_3$ )

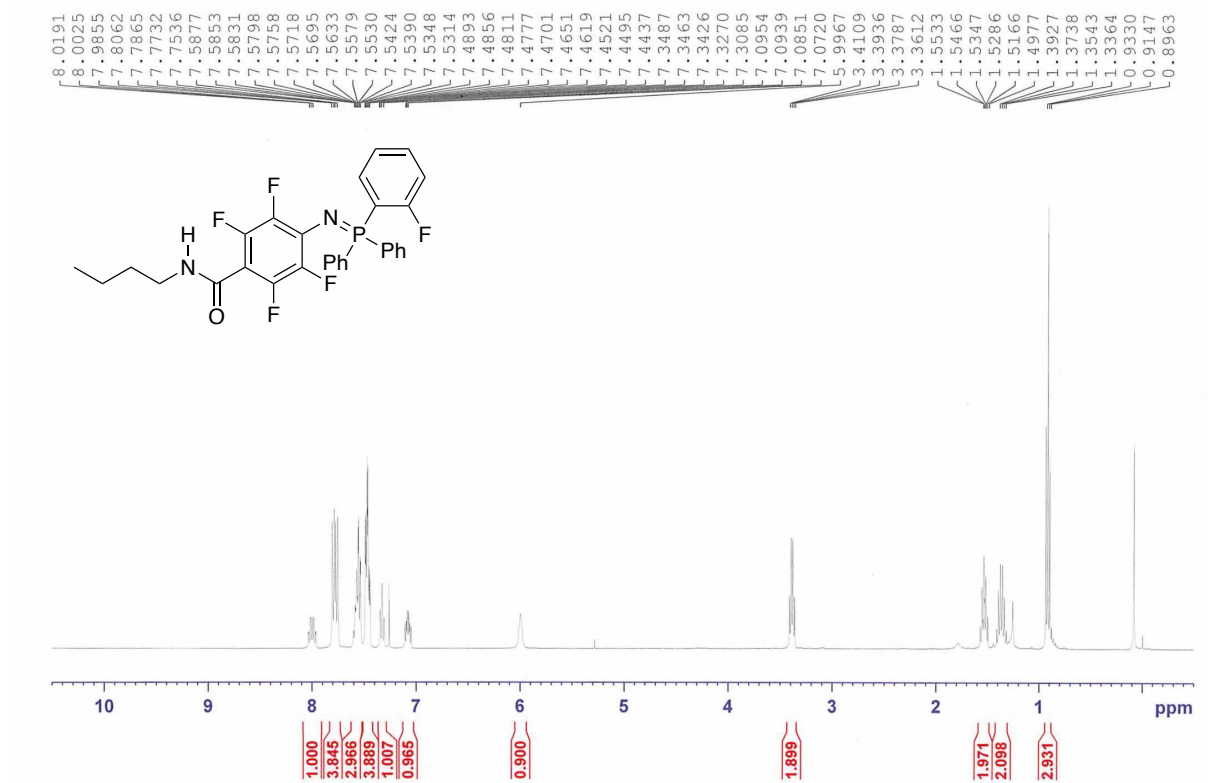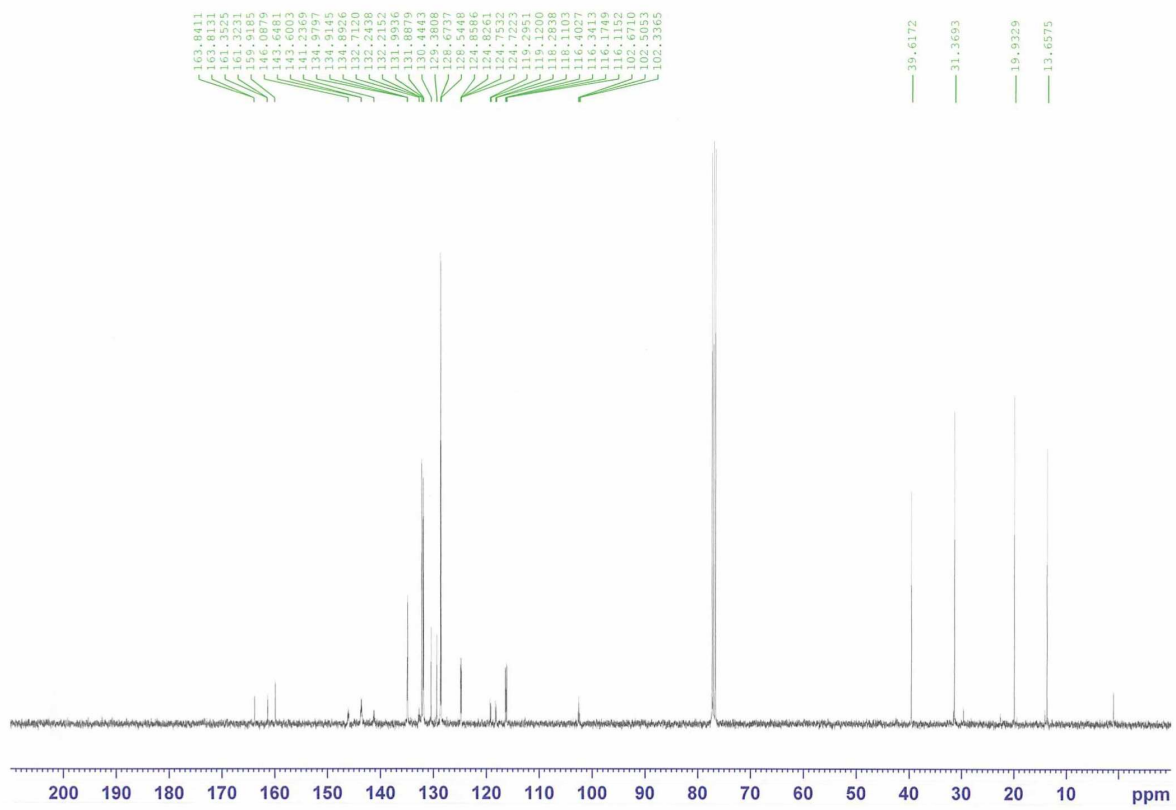

$^1\text{H}$  NMR (400 MHz) and  $^{13}\text{C}$  NMR (101 MHz) spectra of *N*-butyl-4-(((2-chlorophenyl)diphenyl- $\lambda^5$ -phosphanylidene)amino)-2,3,5,6-tetrafluorobenzamide (**5f**) ( $\text{CDCl}_3$ )

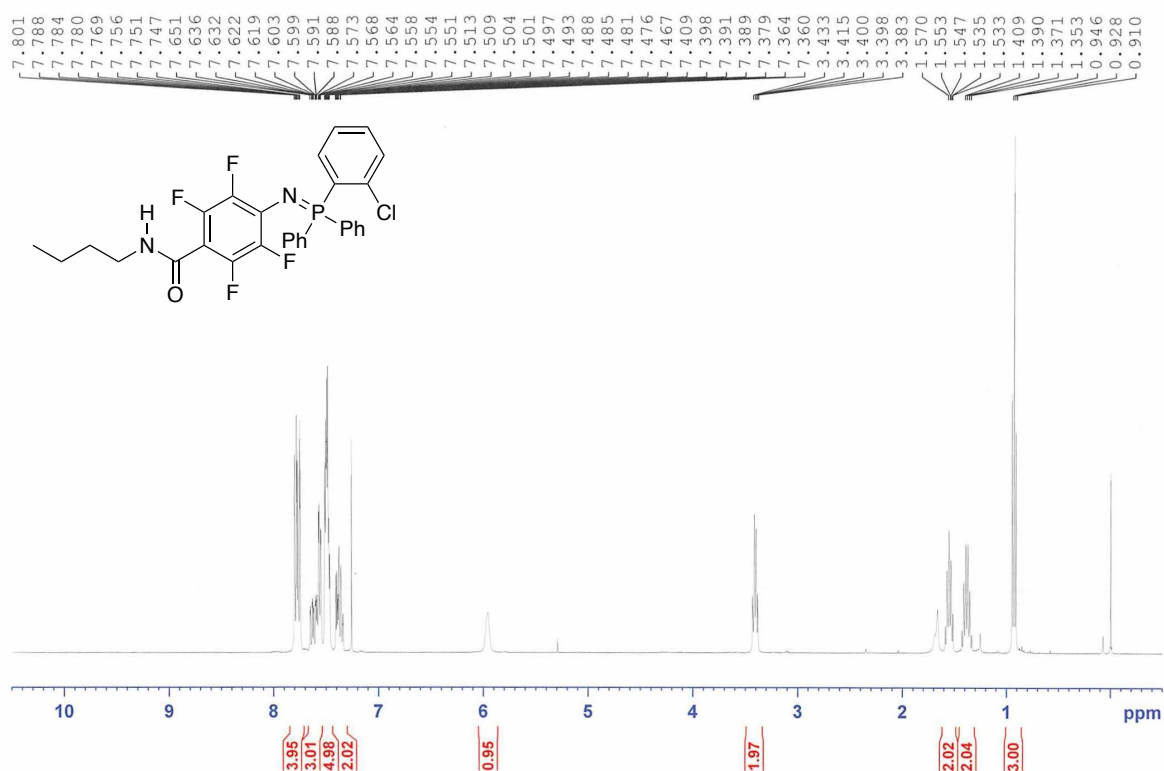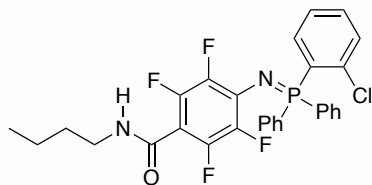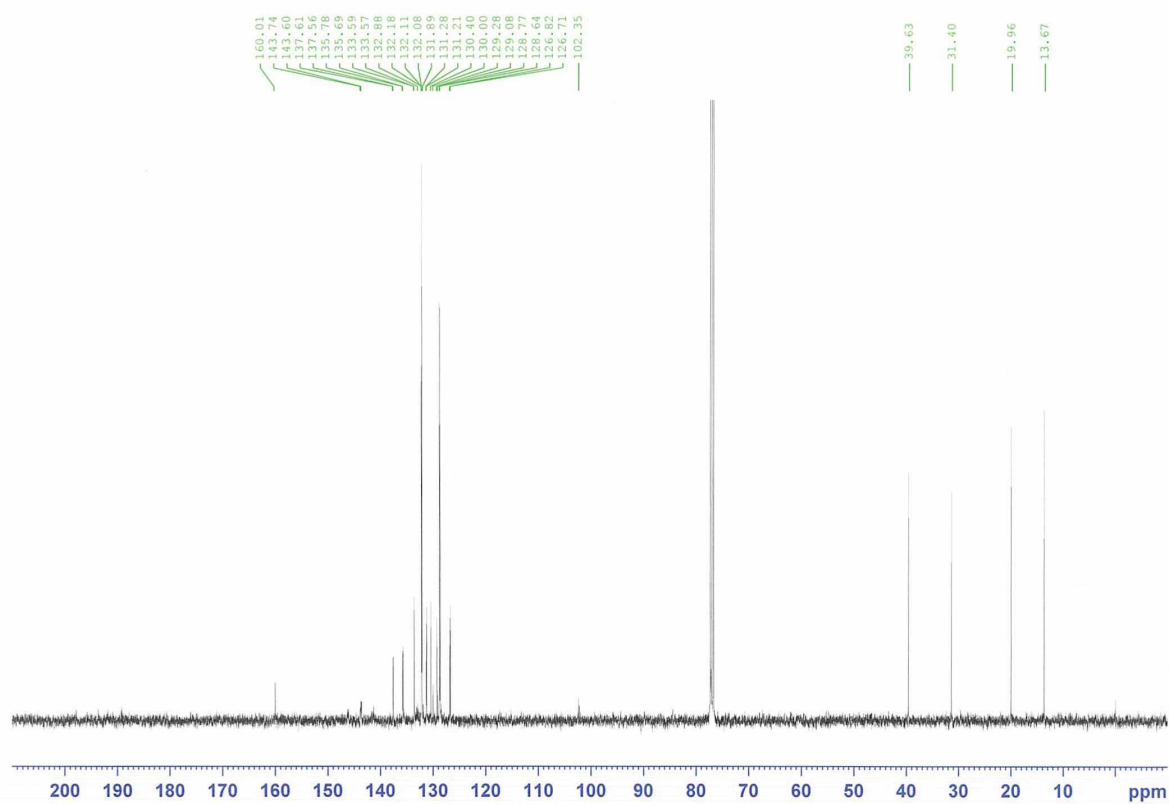

$^1\text{H}$  NMR (400 MHz) and  $^{13}\text{C}$  NMR (101 MHz) spectra of 4-(((2-bromophenyl)diphenyl- $\lambda^5$ -phosphanylidene)amino)-*N*-butyl-2,3,5,6-tetrafluorobenzamide (**5g**) ( $\text{CDCl}_3$ )

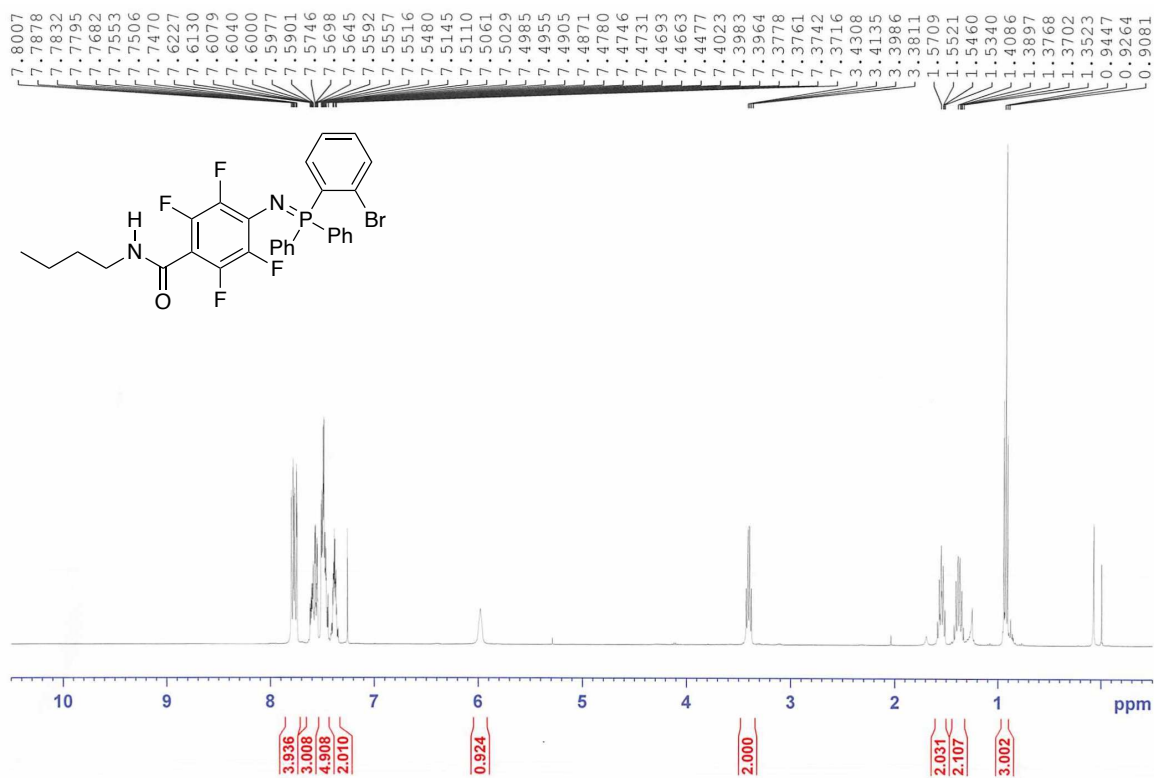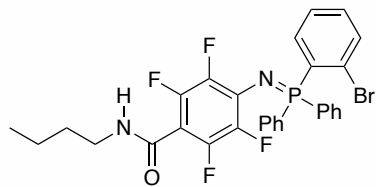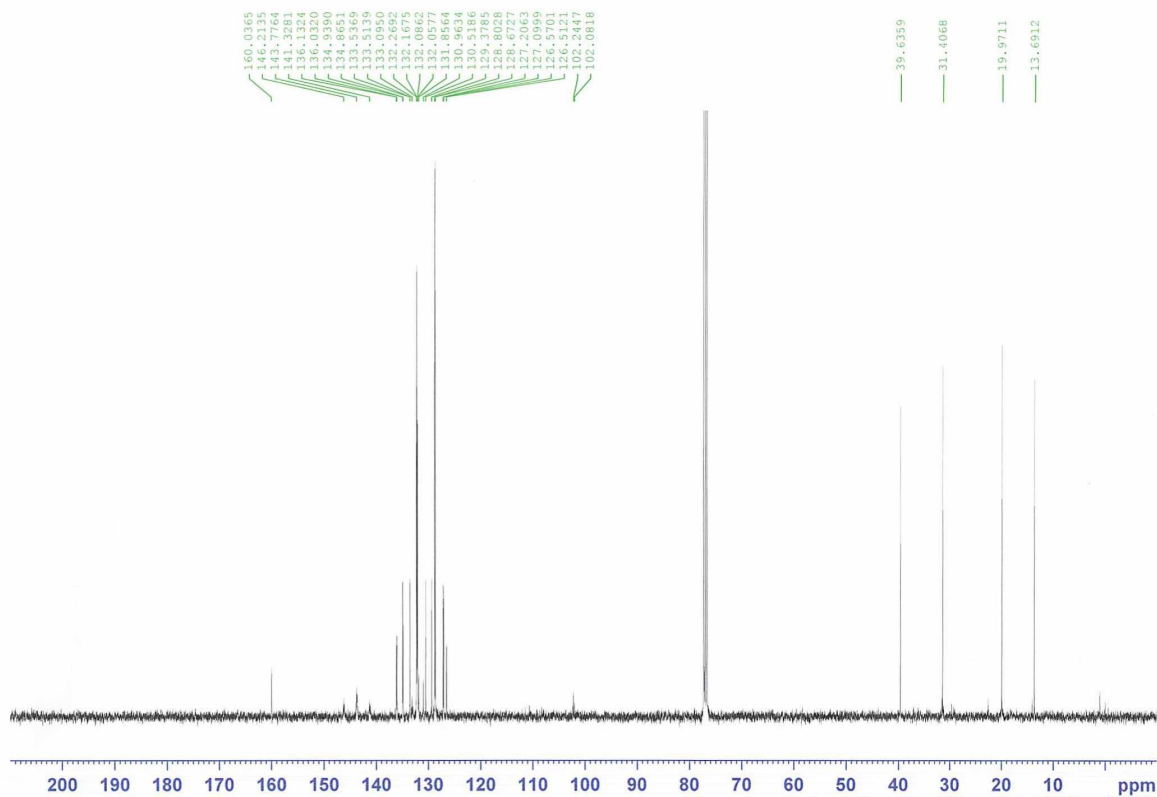

<sup>1</sup>H NMR (400 MHz) and <sup>13</sup>C NMR (101 MHz) spectra of methyl 4-(*N*-(4-(butylcarbamoyl)-2,3,5,6-tetrafluorophenyl)-*P,P*-diphenylphosphorimidoyl)benzoate (**5h**) (CDCl<sub>3</sub>)

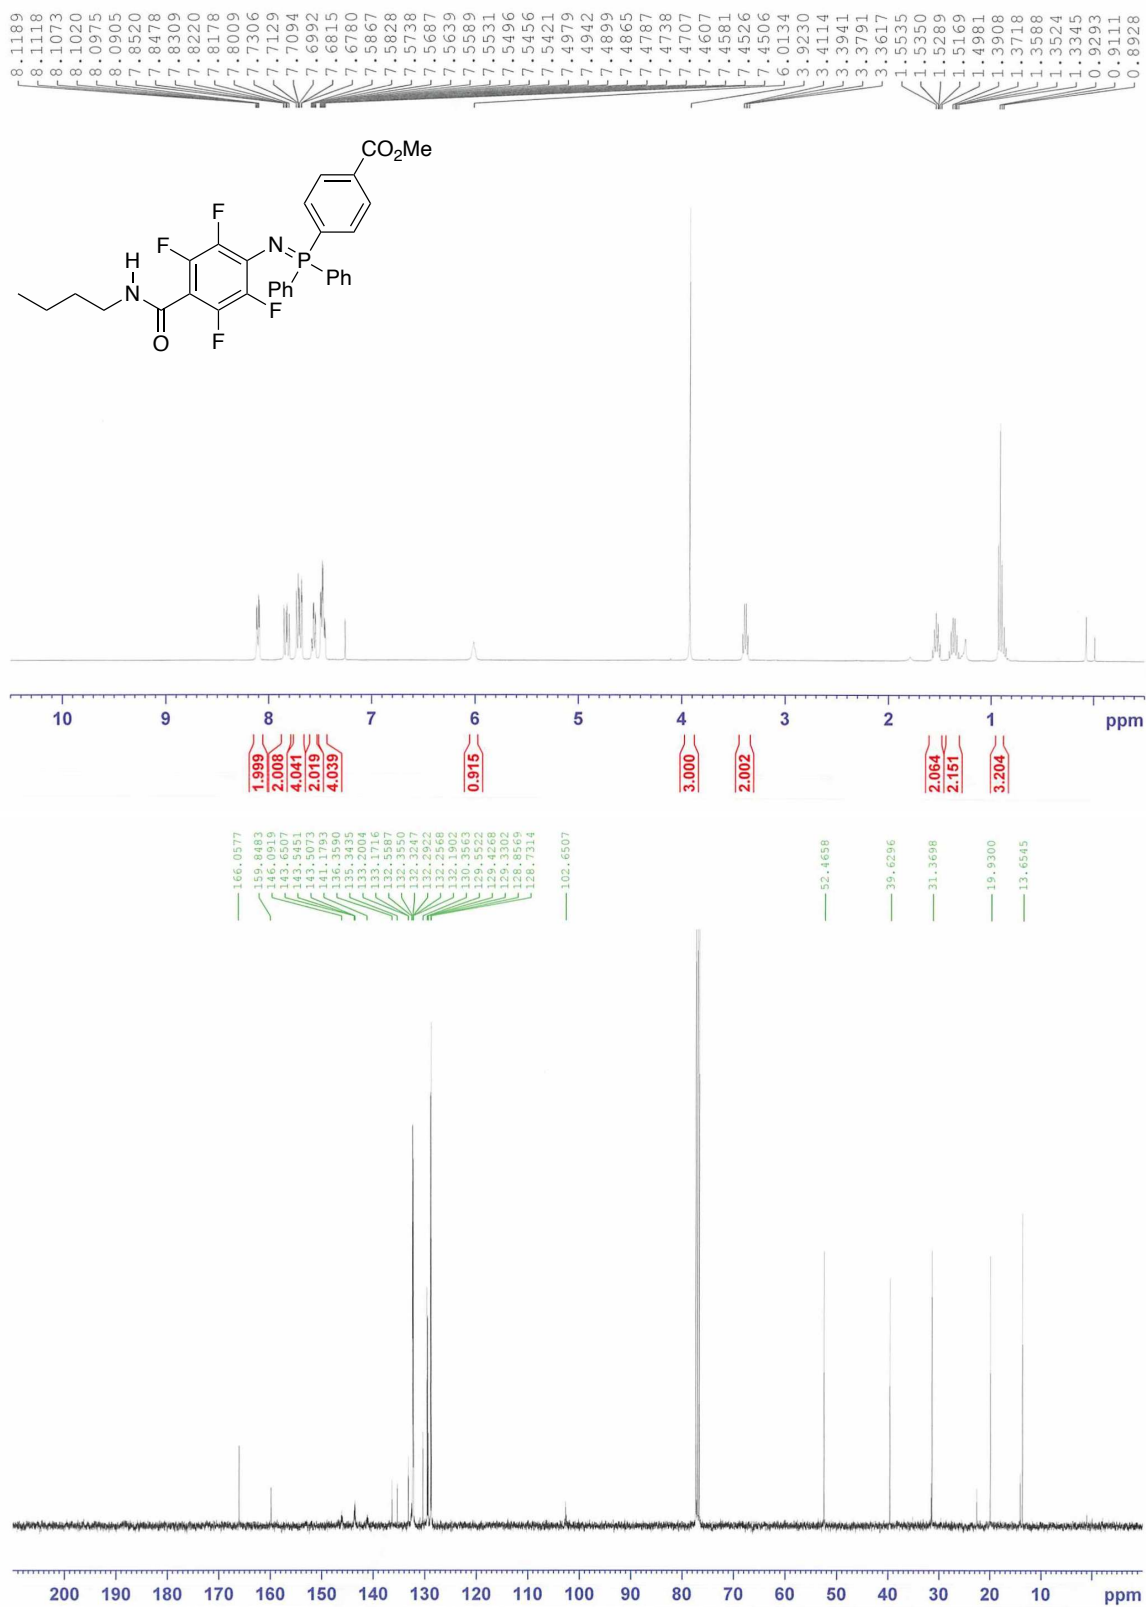

$^1\text{H}$  NMR (400 MHz) and  $^{13}\text{C}$  NMR (101 MHz) spectra of methyl 2-(*N*-(4-(butylcarbamoyl)-2,3,5,6-tetrafluorophenyl)-*P,P*-diphenylphosphorimidoyl)-5-methoxybenzoate (**5i**) ( $\text{CDCl}_3$ )

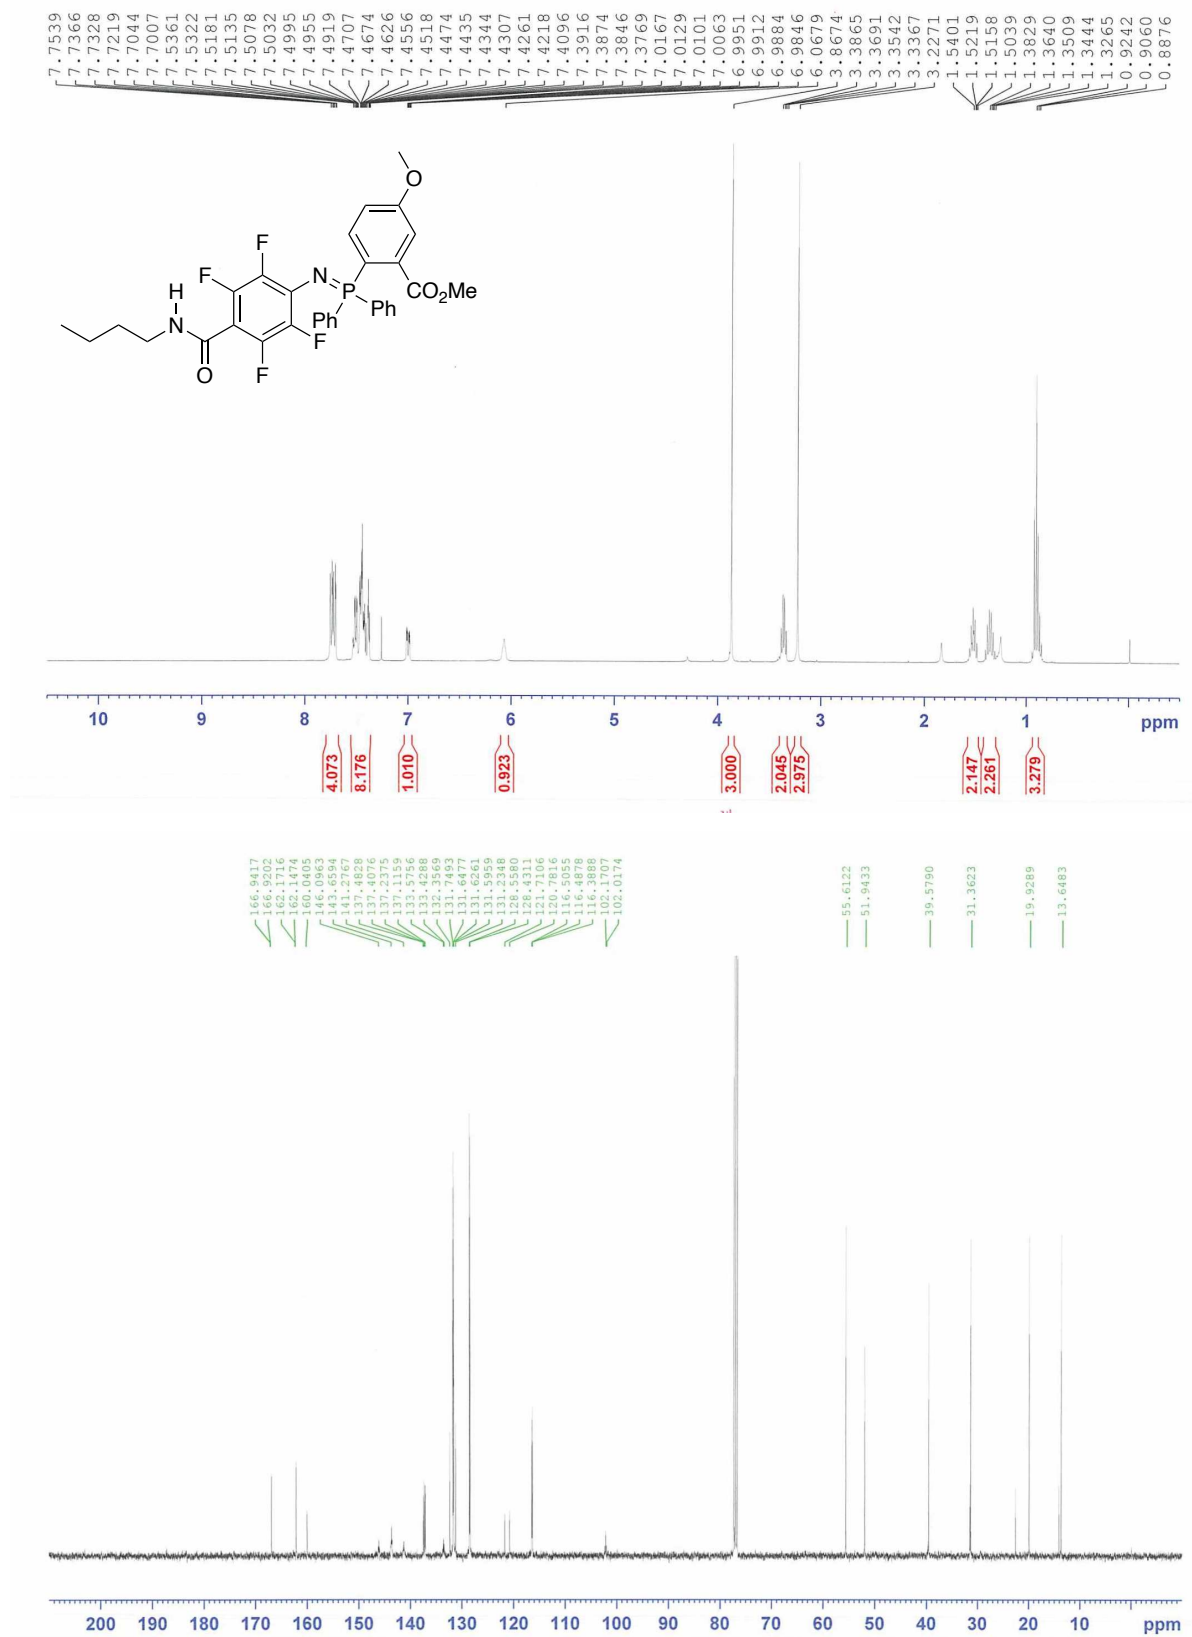



<sup>1</sup>H NMR (400 MHz) and <sup>13</sup>C NMR (101 MHz) spectra of dimethyl 2-(*N*-(4-(butylcarbamoyl)-2,3,5,6-tetrafluorophenyl)-*P,P*-diphenylphosphorimidoyl)terephthalate (**5j**) (CDCl<sub>3</sub>)

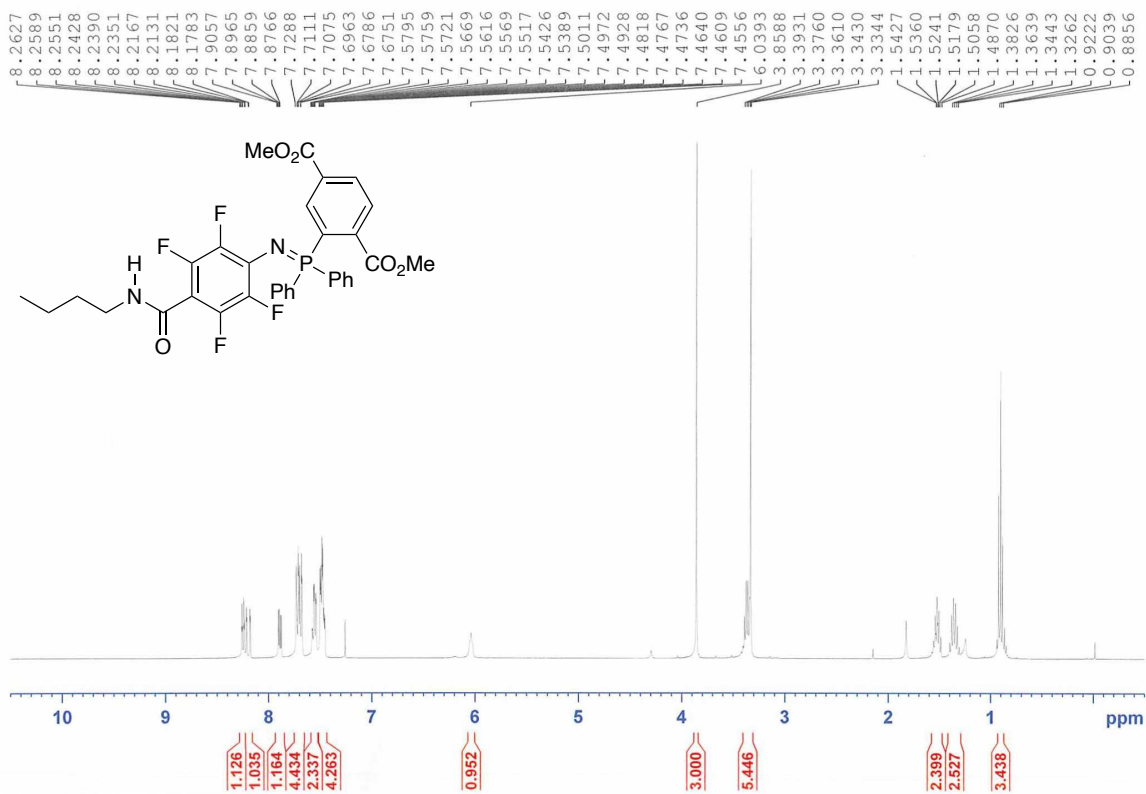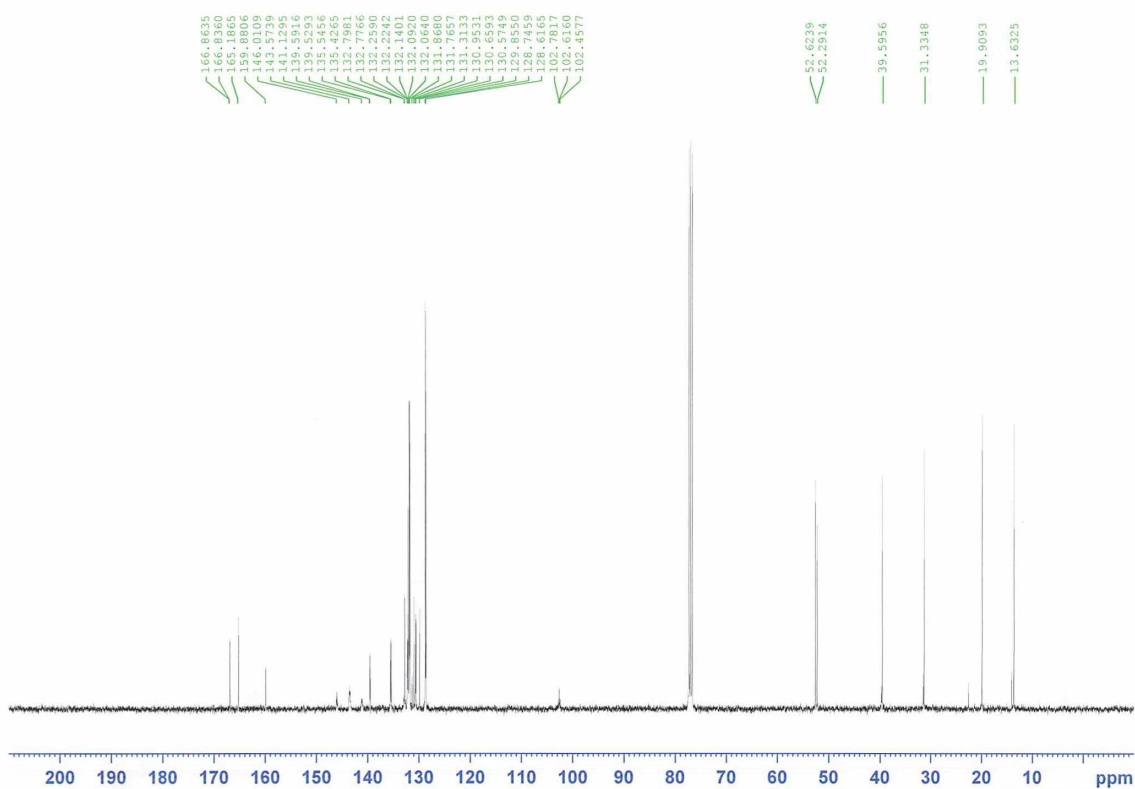

<sup>1</sup>H NMR (400 MHz) and <sup>13</sup>C NMR (101 MHz) spectra of methyl 4-(butylcarbamoyl)-2-(*N*-(4-(butylcarbamoyl)-2,3,5,6-tetrafluorophenyl)-*P,P*-diphenylphosphorimidoyl)benzoate (**5k**) (CDCl<sub>3</sub>)

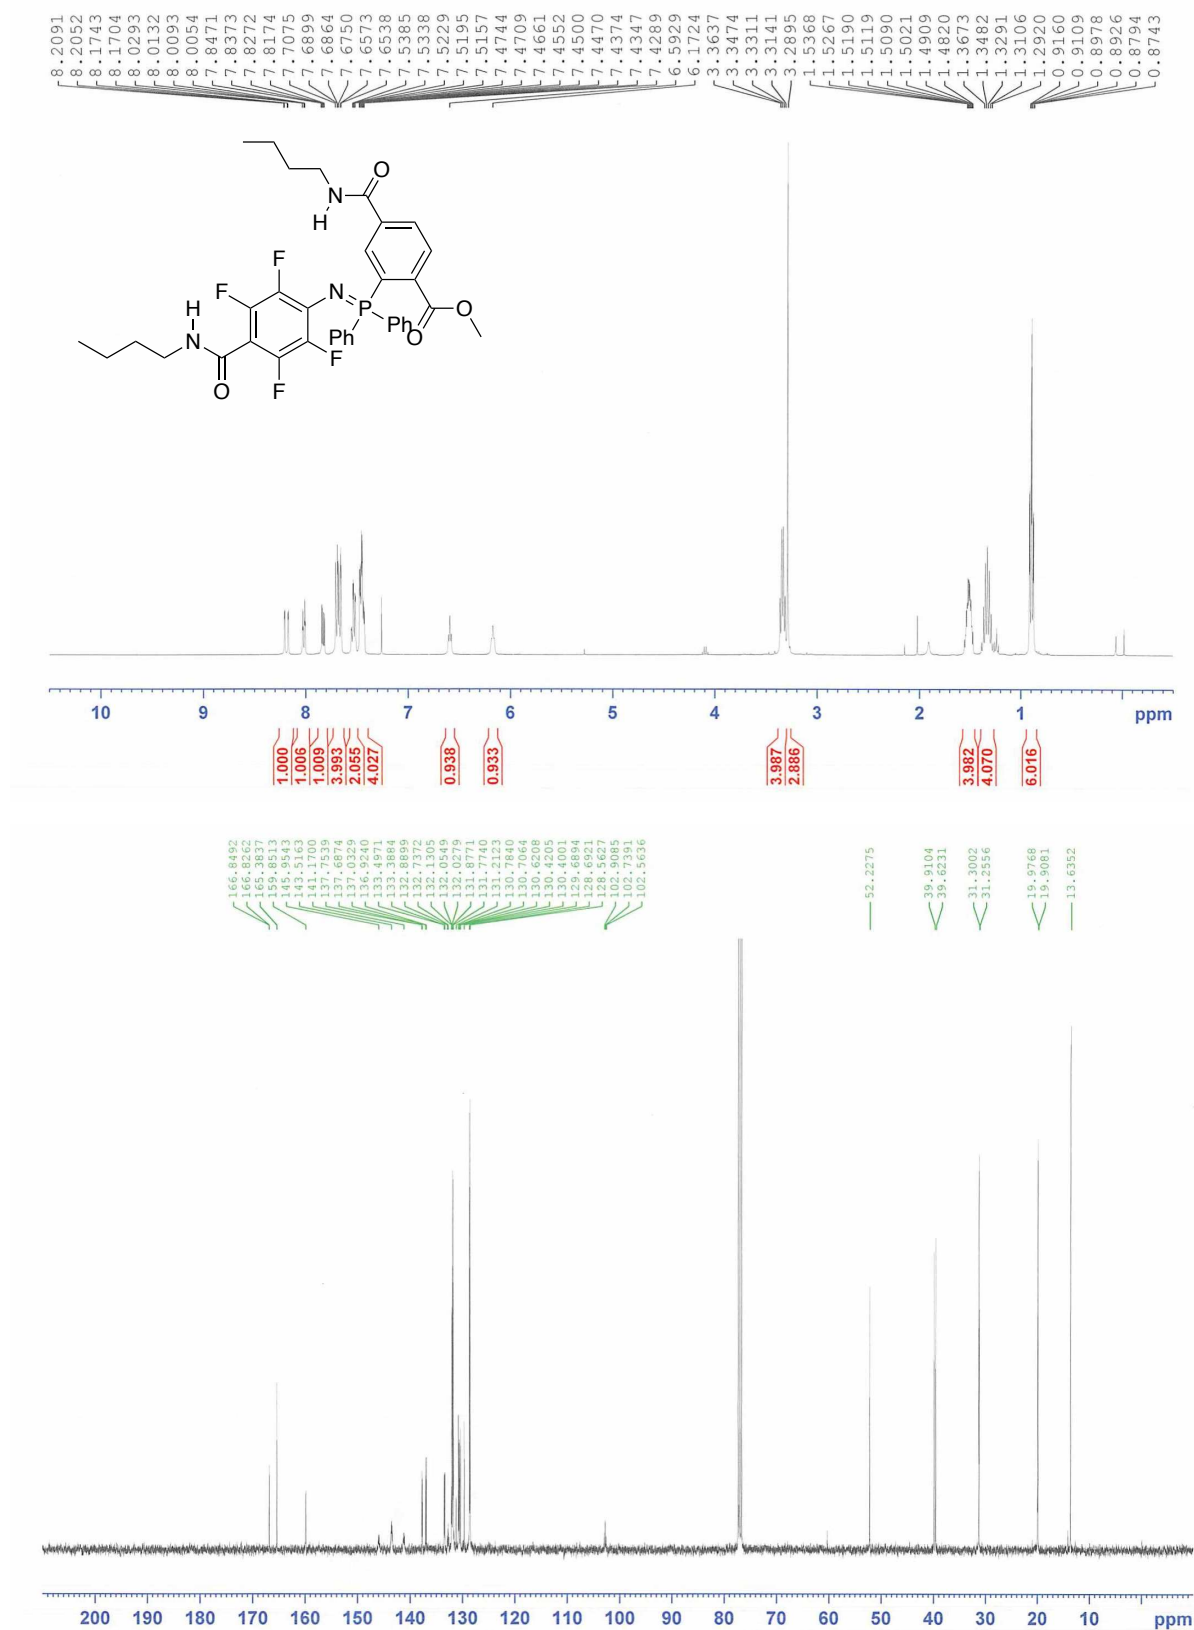

$^1\text{H}$  NMR (400 MHz) and  $^{13}\text{C}$  NMR (101 MHz) spectra of *tert*-butyl (1-(4-azido-3,5-dichlorophenyl)-1-oxo-5,8,11-trioxa-2-azatridecan-13-yl)carbamate (**8**) ( $\text{CDCl}_3$ )

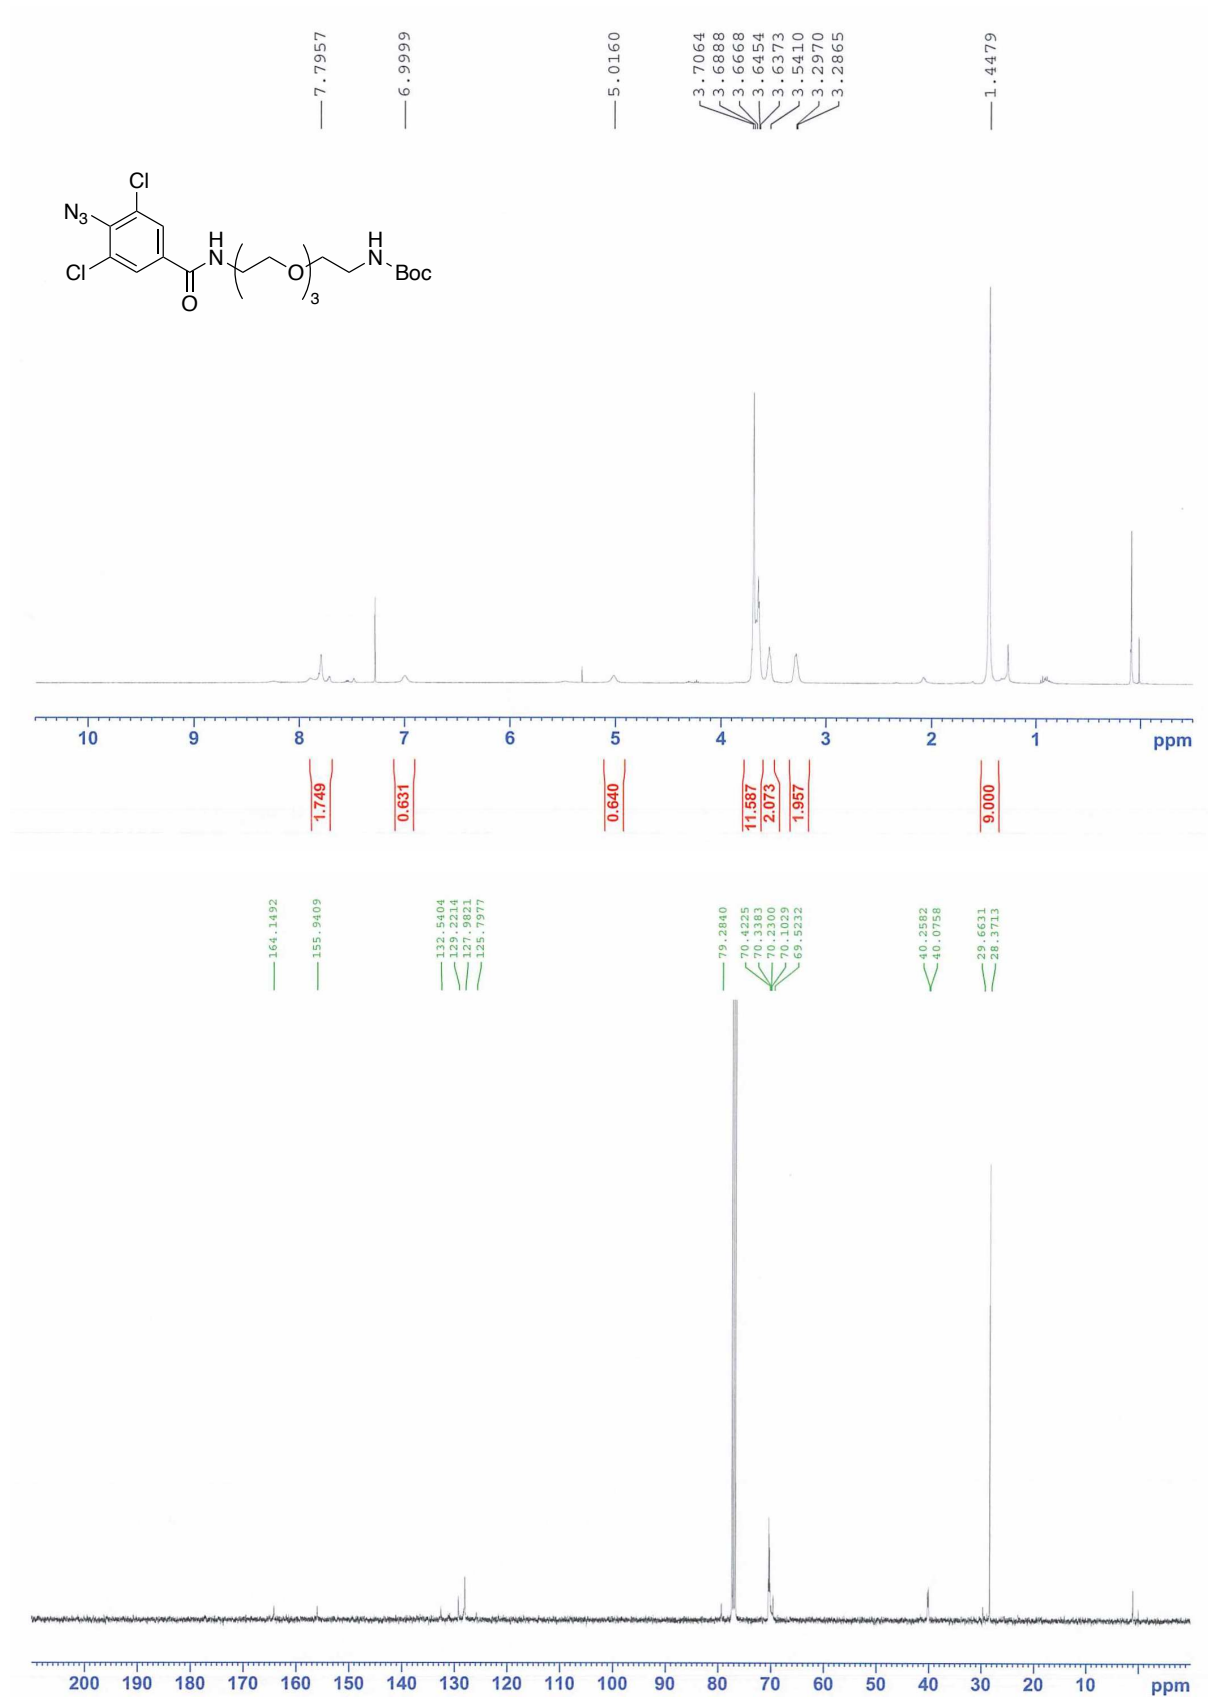

<sup>1</sup>H NMR (400 MHz) and <sup>13</sup>C NMR (101 MHz) spectra of 4-azido-*N*-(1-(4-azido-3,5-dichlorophenyl)-1-oxo-5,8,11-trioxa-2-azatridecan-13-yl)-2,3,5,6-tetrafluorobenzamide (**9**) (CDCl<sub>3</sub>)

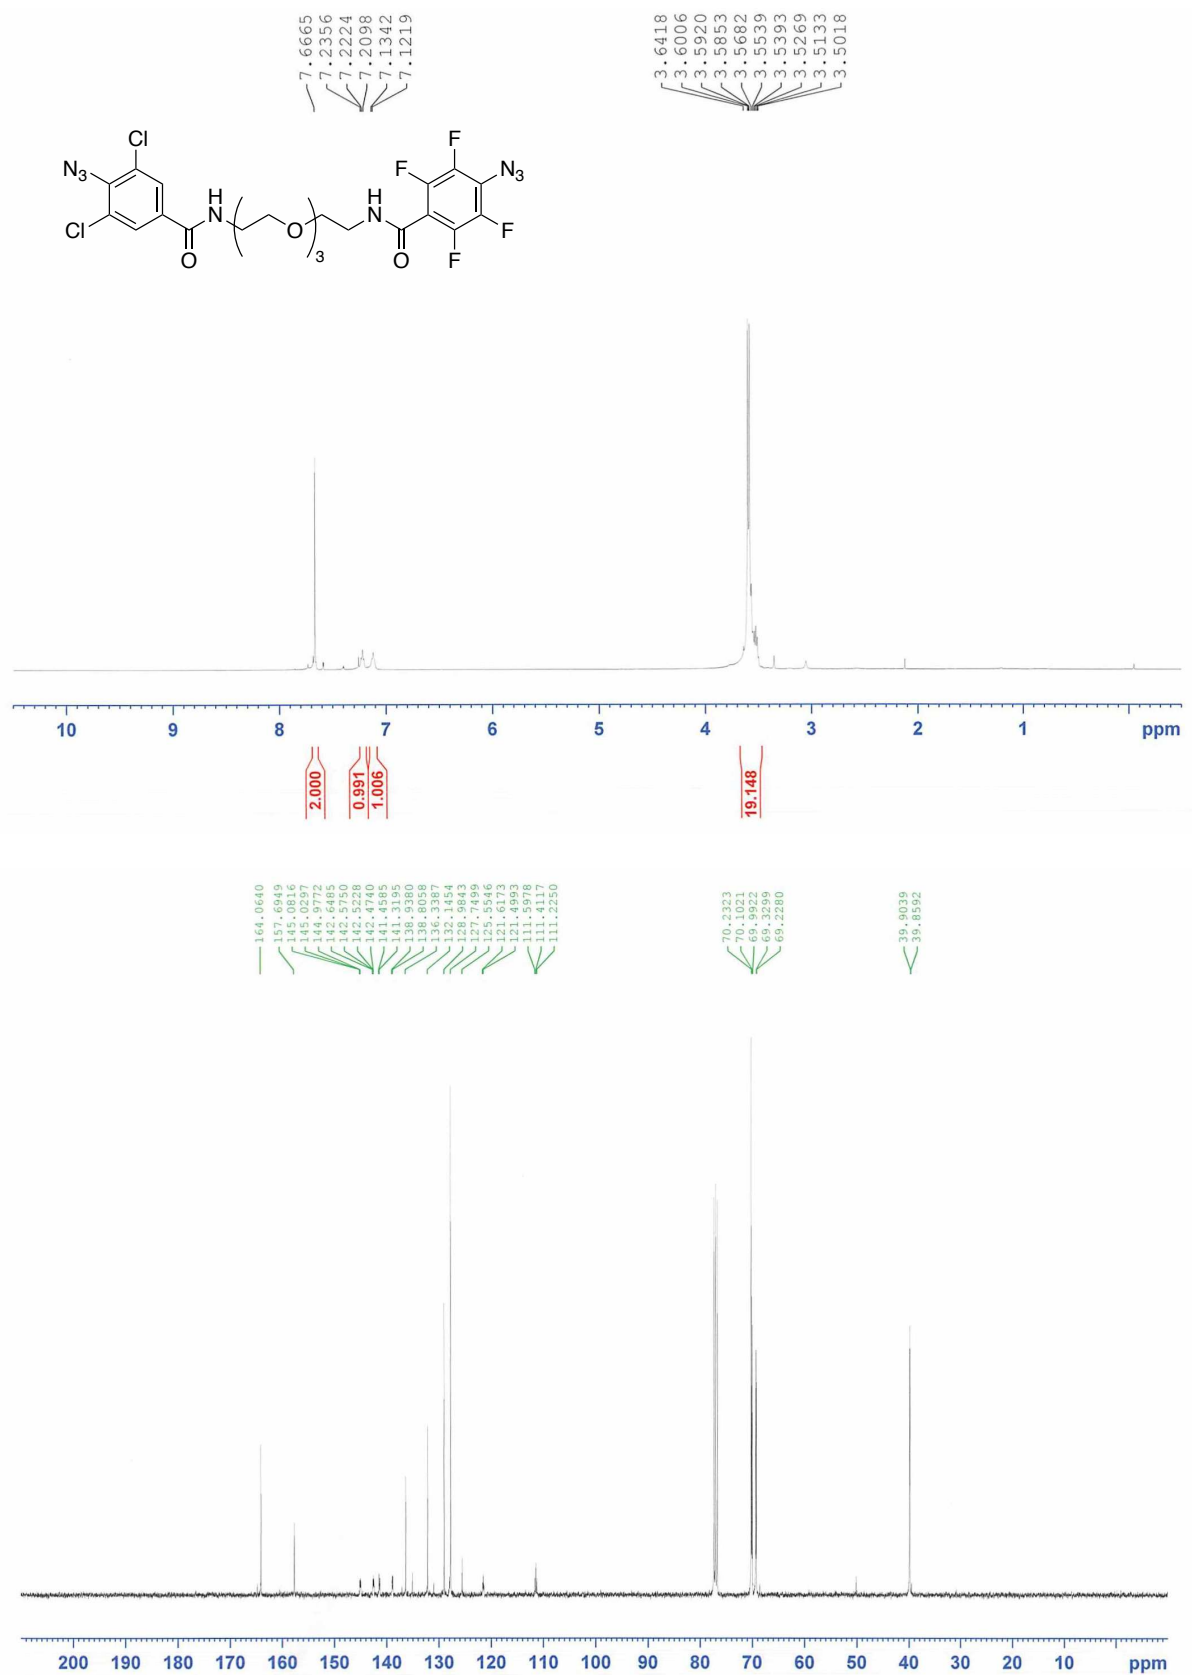

<sup>1</sup>H NMR (400 MHz) and <sup>13</sup>C NMR (101 MHz) spectra of methyl 2-(*N*-(4-((1-(4-azido-3,5-dichlorophenyl)-1-oxo-5,8,11-trioxa-2-azatridecan-13-yl)carbamoyl)-2,3,5,6-tetrafluorophenyl)-*P,P*-diphenylphosphorimidoyl)benzoate (**10**) (CDCl<sub>3</sub>)

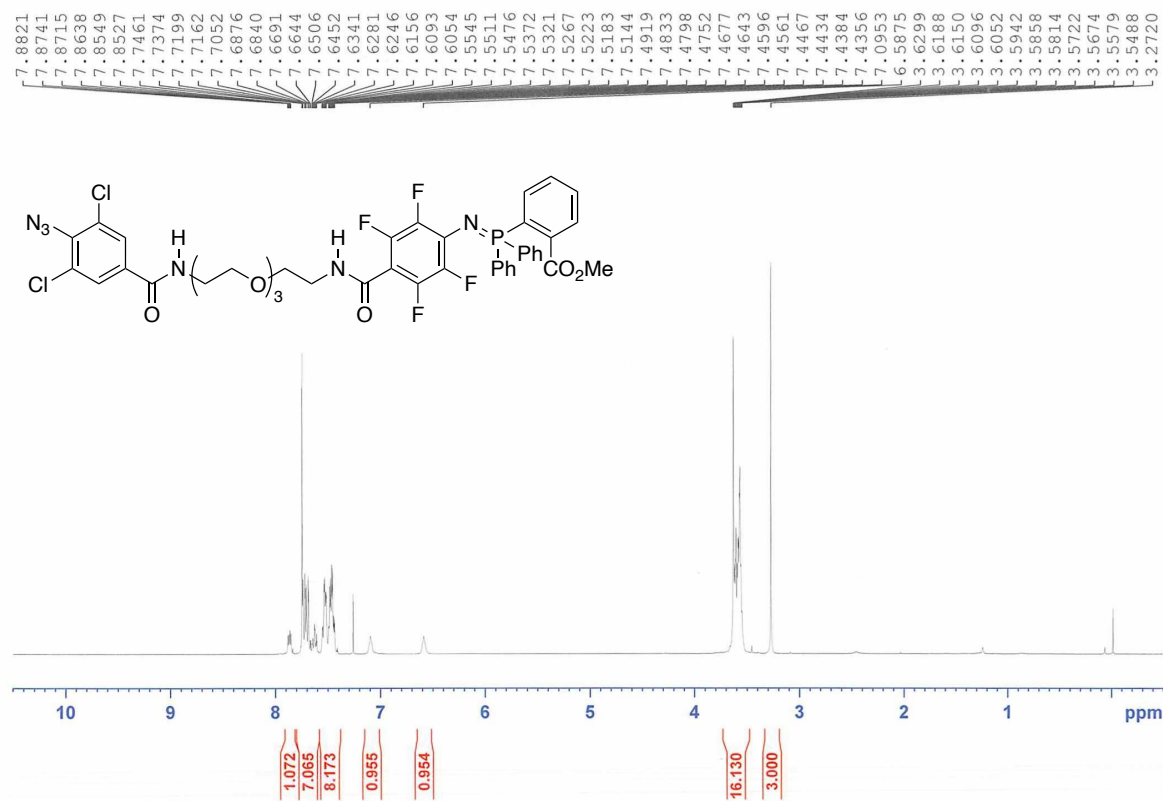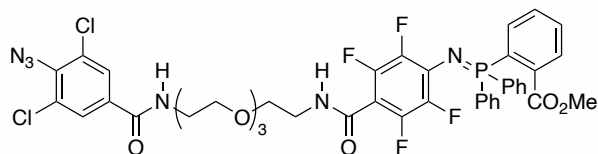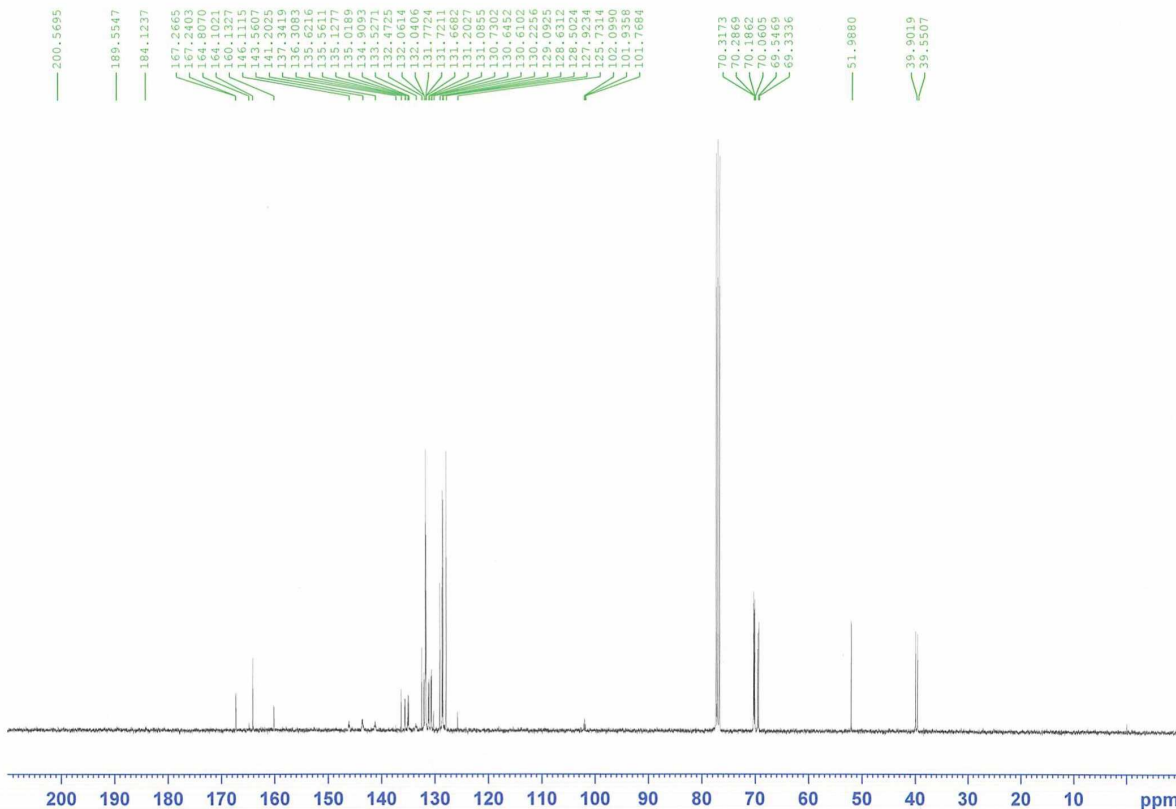

<sup>1</sup>H NMR (400 MHz) and <sup>13</sup>C NMR (101 MHz) spectra of methyl 2-(N-(4-((1-(3,5-dichloro-4-((triphenyl-λ<sup>5</sup>-phosphaneylidene)amino)phenyl)-1-oxo-5,8,11-trioxo-2-azatriodecan-13-yl)carbamoyl)-2,3,5,6-tetrafluorophenyl)-P,P-diphenylphosphorimidoyl)benzoate (**11**) (CDCl<sub>3</sub>)

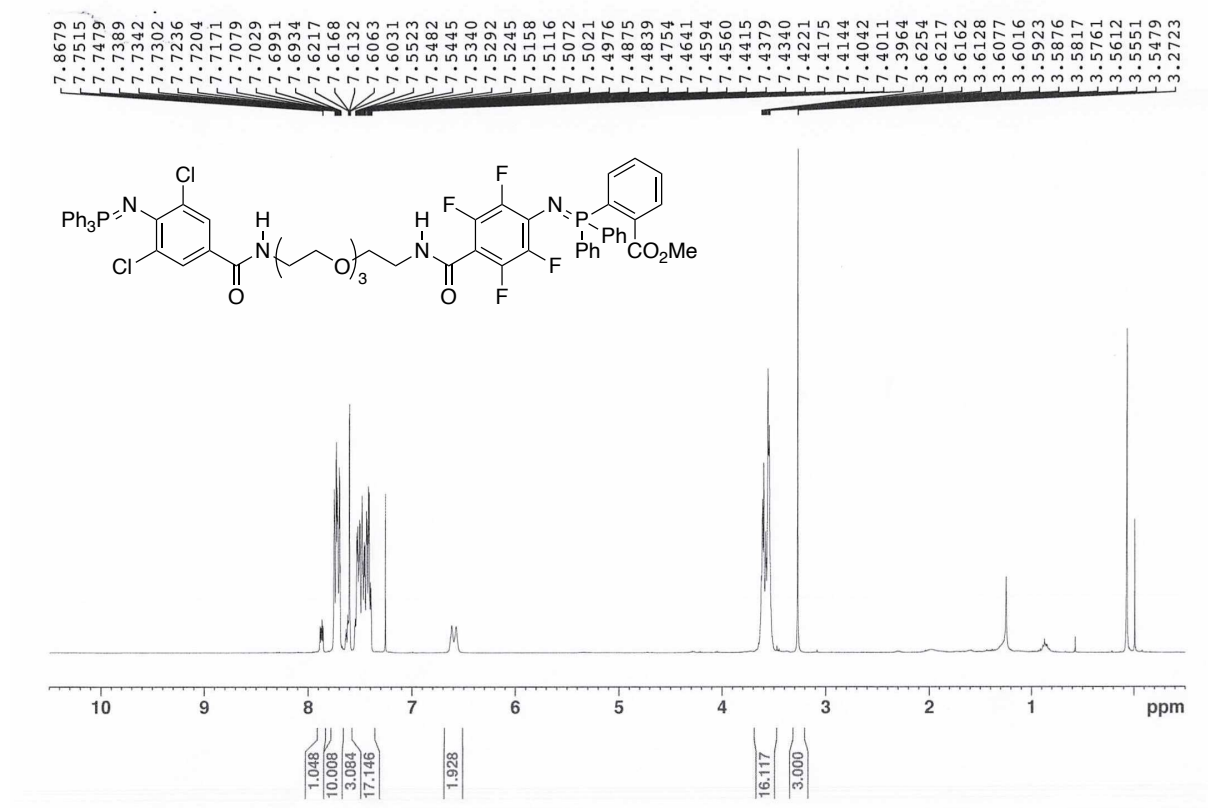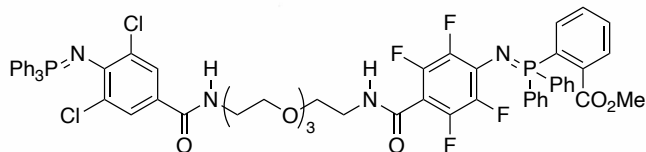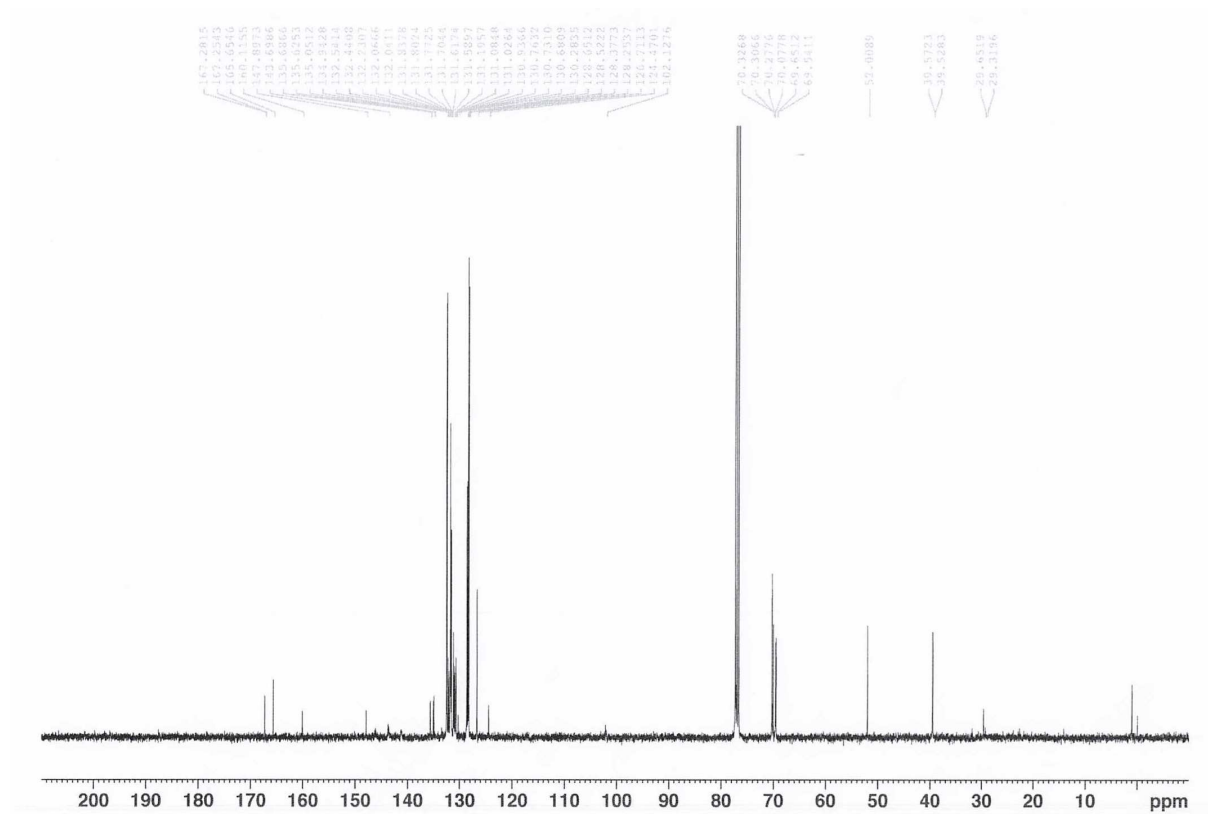

$^1\text{H}$  NMR (400 MHz) and  $^{13}\text{C}$  NMR (101 MHz) spectra of *tert*-butyl (2-(2-(2-(2-azidoethoxy)ethoxy)ethoxy)ethyl)(prop-2-yn-1-yl)carbamate (**14**) ( $\text{CDCl}_3$ )

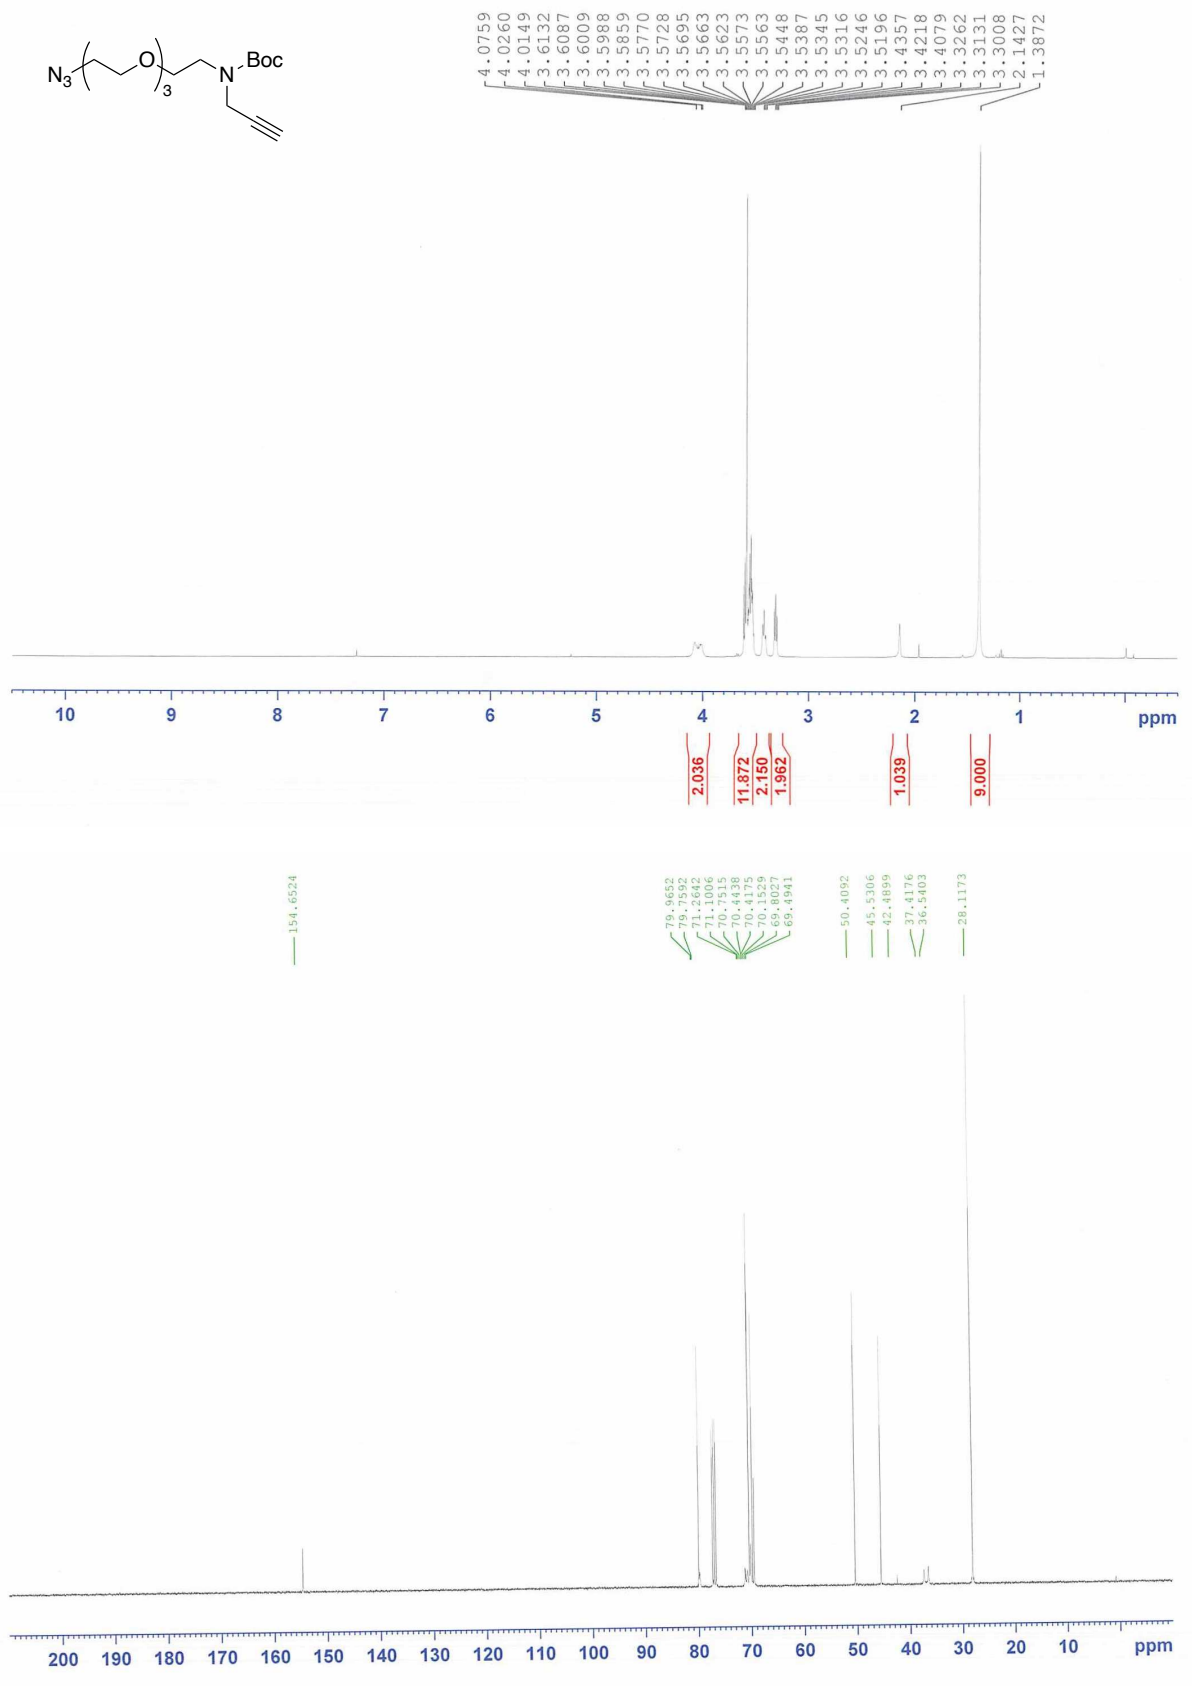

$^1\text{H}$  NMR (400 MHz) and  $^{13}\text{C}$  NMR (101 MHz) spectra of *tert*-butyl (1-(4-azido-2,3,5,6-tetrafluorophenyl)-1-oxo-5,8,11-trioxa-2-azatridecan-13-yl)(prop-2-yn-1-yl)carbamate (**15**) ( $\text{CDCl}_3$ )

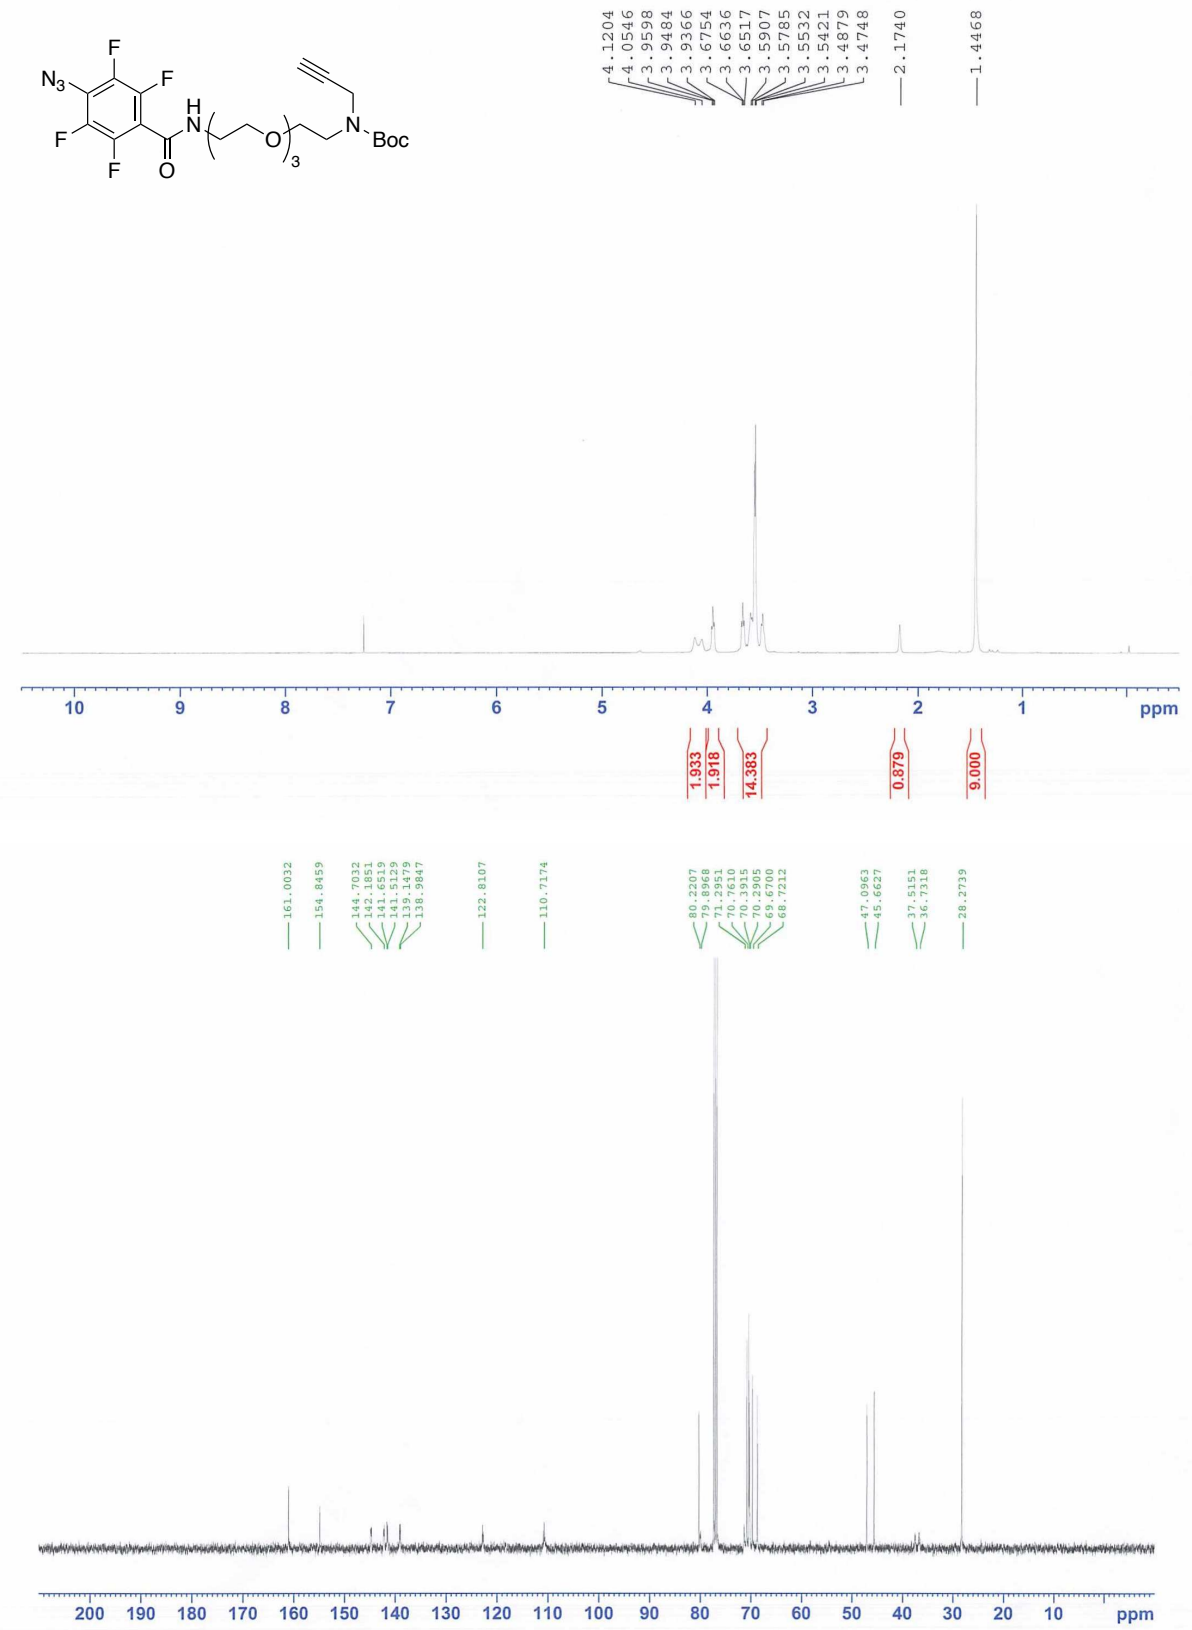



$^1\text{H}$  NMR (400 MHz) and  $^{13}\text{C}$  NMR (101 MHz) spectra of 4-azido-*N*-(12-(4-azido-3,5-dichlorobenzoyl)-3,6,9-trioxa-12-azapentadec-14-yn-1-yl)-2,3,5,6-tetrafluorobenzamide (**16**) ( $\text{CDCl}_3$ )

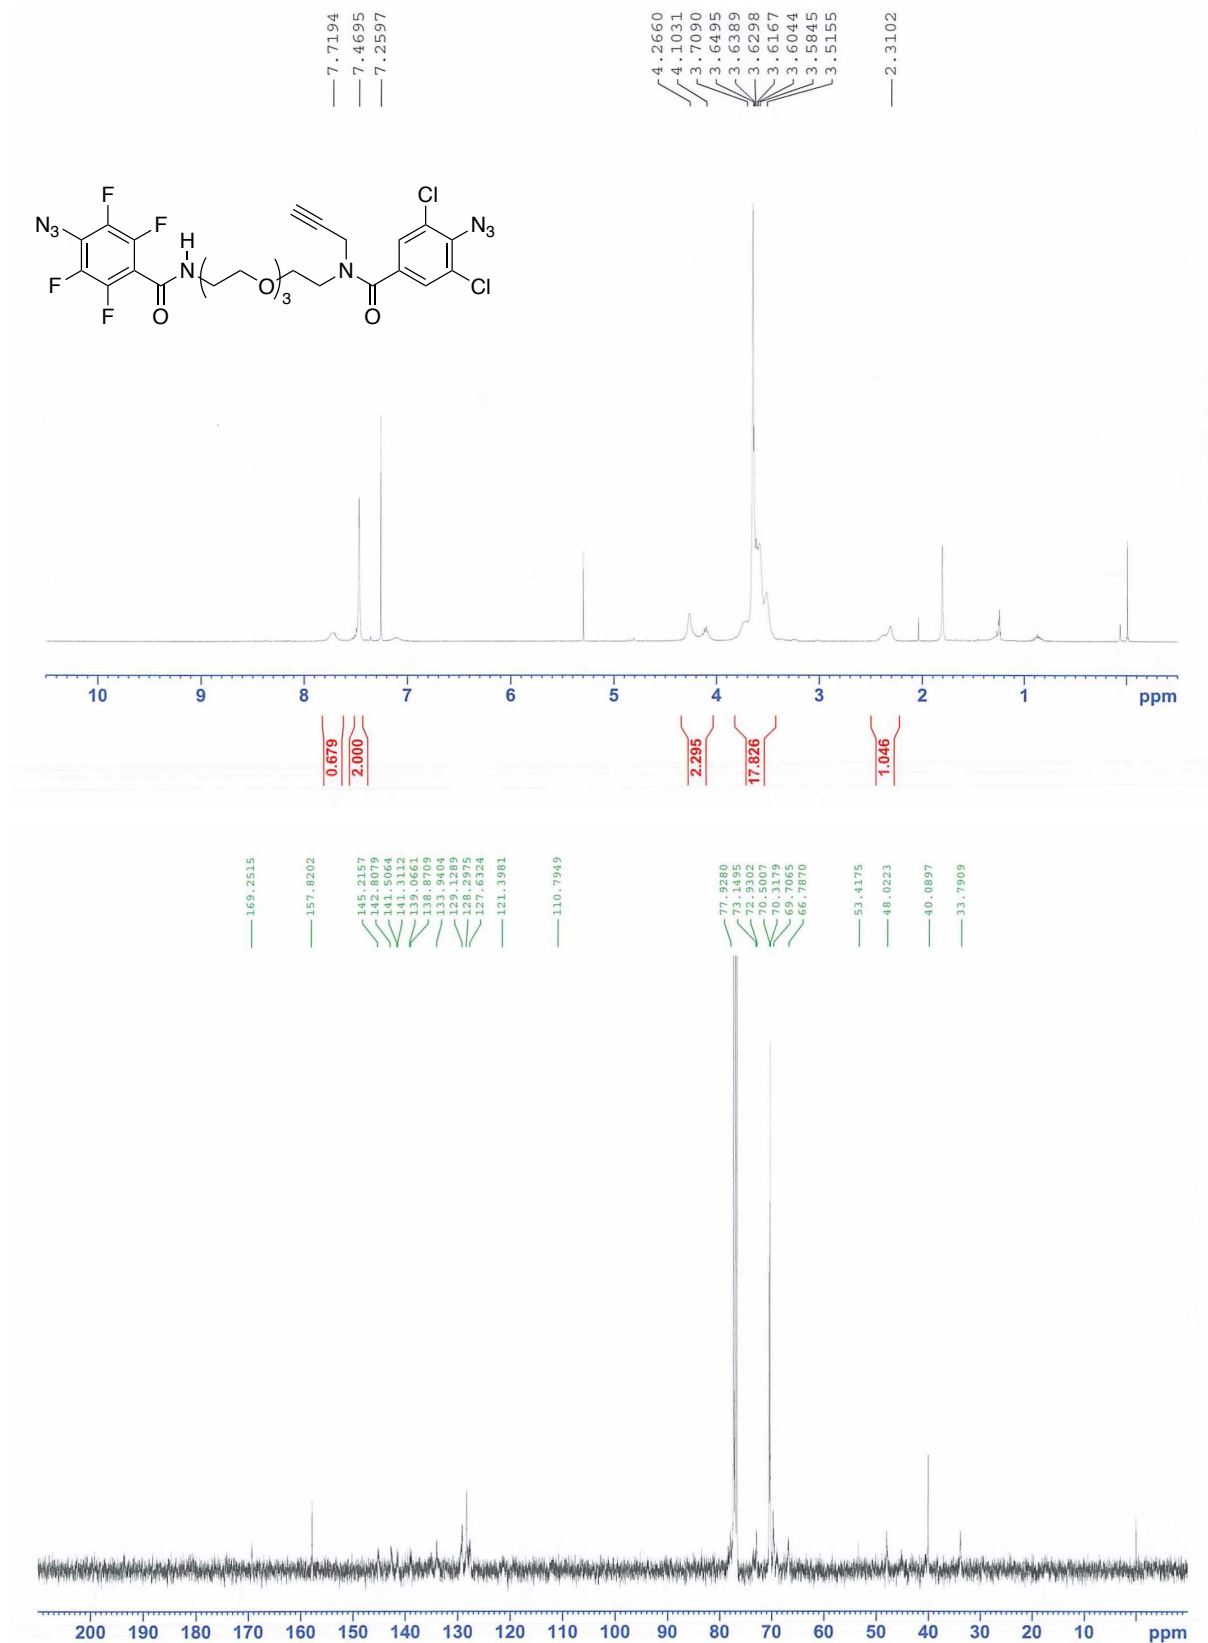

<sup>1</sup>H NMR (400 MHz) and <sup>13</sup>C NMR (101 MHz) spectra of methyl 2-(*N*-(4-((12-(4-azido-3,5-dichlorobenzoyl)-3,6,9-trioxa-12-azapentadec-14-yn-1-yl)carbamoyl)-2,3,5,6-tetrafluorophenyl)-*P,P*-diphenylphosphorimidoyl)benzoate (**S1**) (CDCl<sub>3</sub>)

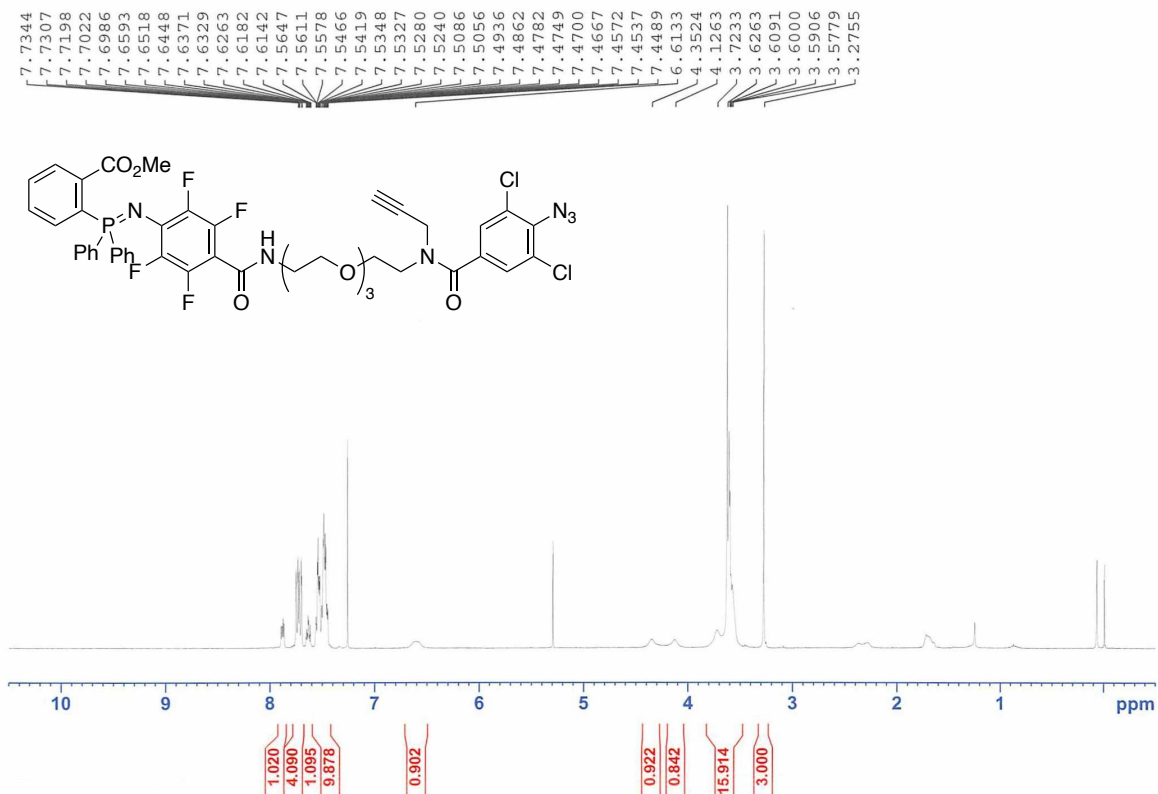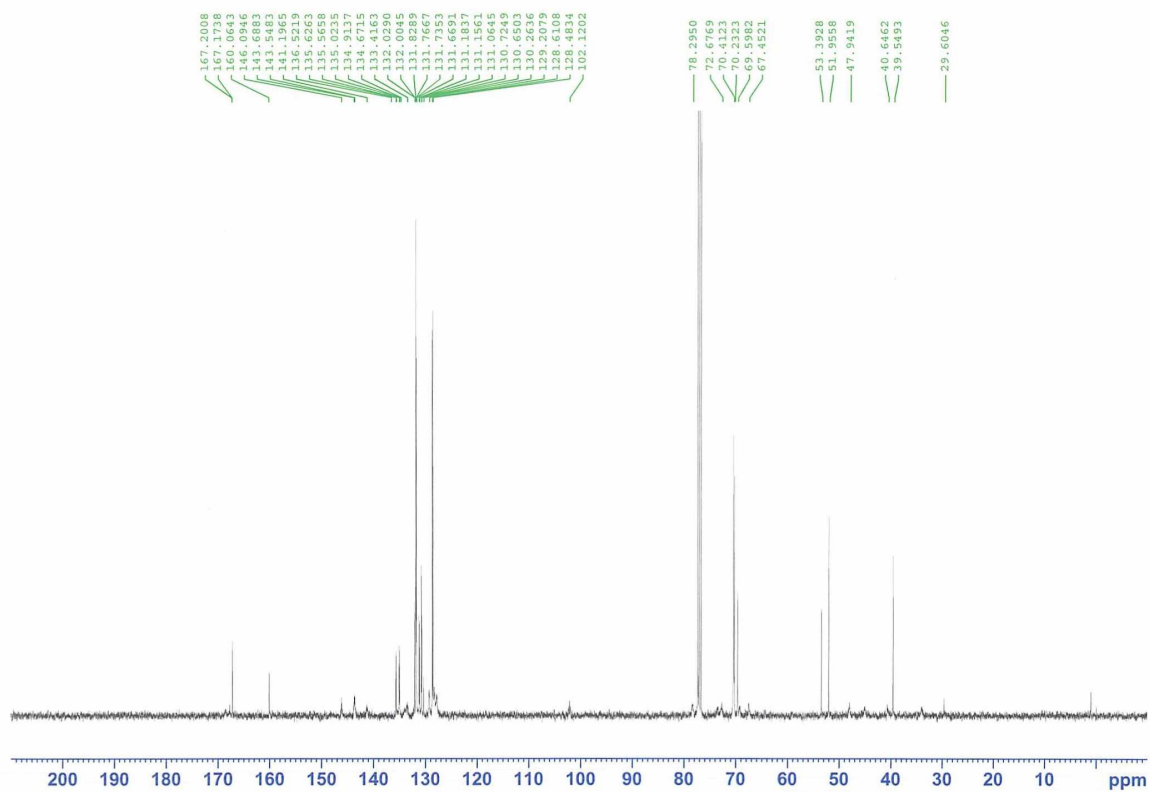

$^1\text{H}$  NMR (400 MHz) and  $^{13}\text{C}$  NMR (101 MHz) spectra of methyl 2-(*N*-(4-((12-(3,5-dichloro-4-((triphenyl- $\lambda^5$ -phosphanylidene)amino)benzoyl)-3,6,9-trioxa-12-azapentadec-14-yn-1-yl)carbamoyl)-2,3,5,6-tetrafluorophenyl)-*P,P*-diphenylphosphorimidoyl)benzoate (**S3**) ( $\text{CDCl}_3$ )

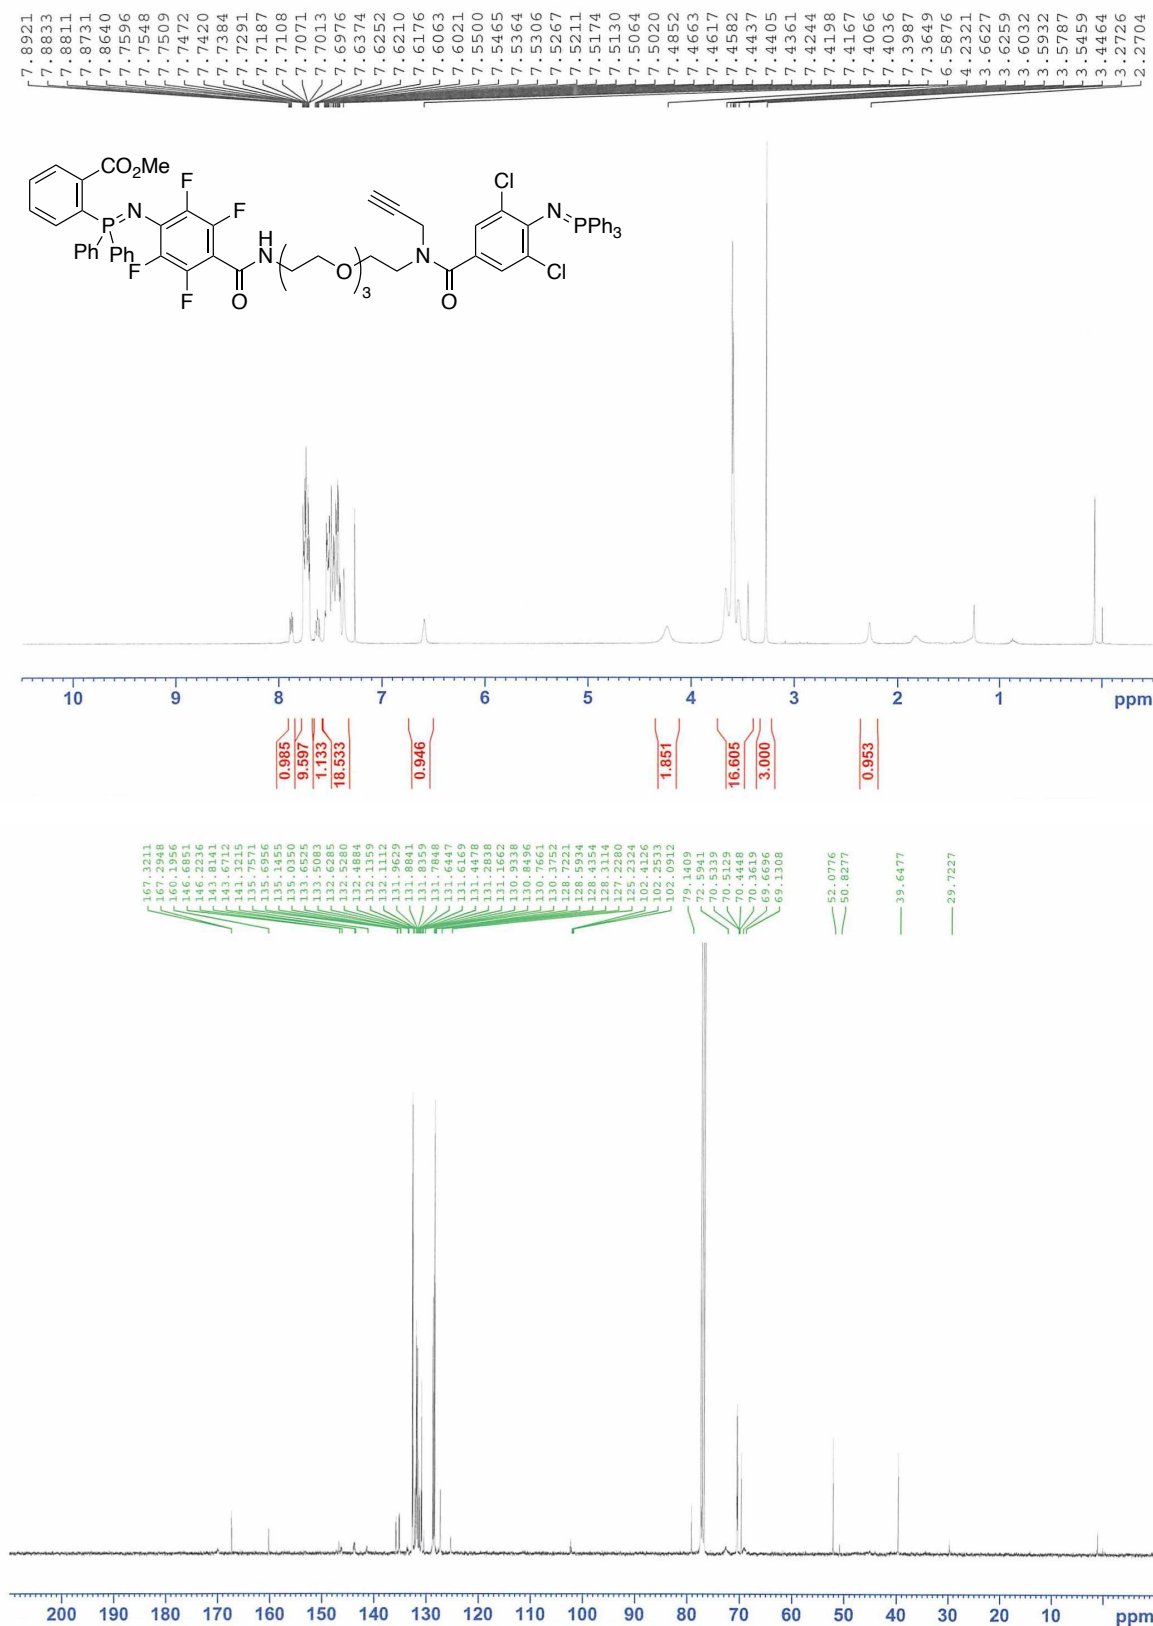

<sup>1</sup>H NMR (400 MHz) and <sup>13</sup>C NMR (101 MHz) spectra of methyl 2-(N-(4-((2-((1-benzyl-1*H*-1,2,3-triazol-4-yl)methyl)-1-(3,5-dichloro-4-((triphenyl-λ<sup>5</sup>-phosphanylidene)amino)phenyl)-1-oxo-5,8,11-trioxa-2-azatriecan-13-yl)carbamoyl)-2,3,5,6-tetrafluorophenyl)-*P,P*-diphenylphosphorimidoyl)benzoate (**17**) (CDCl<sub>3</sub>)

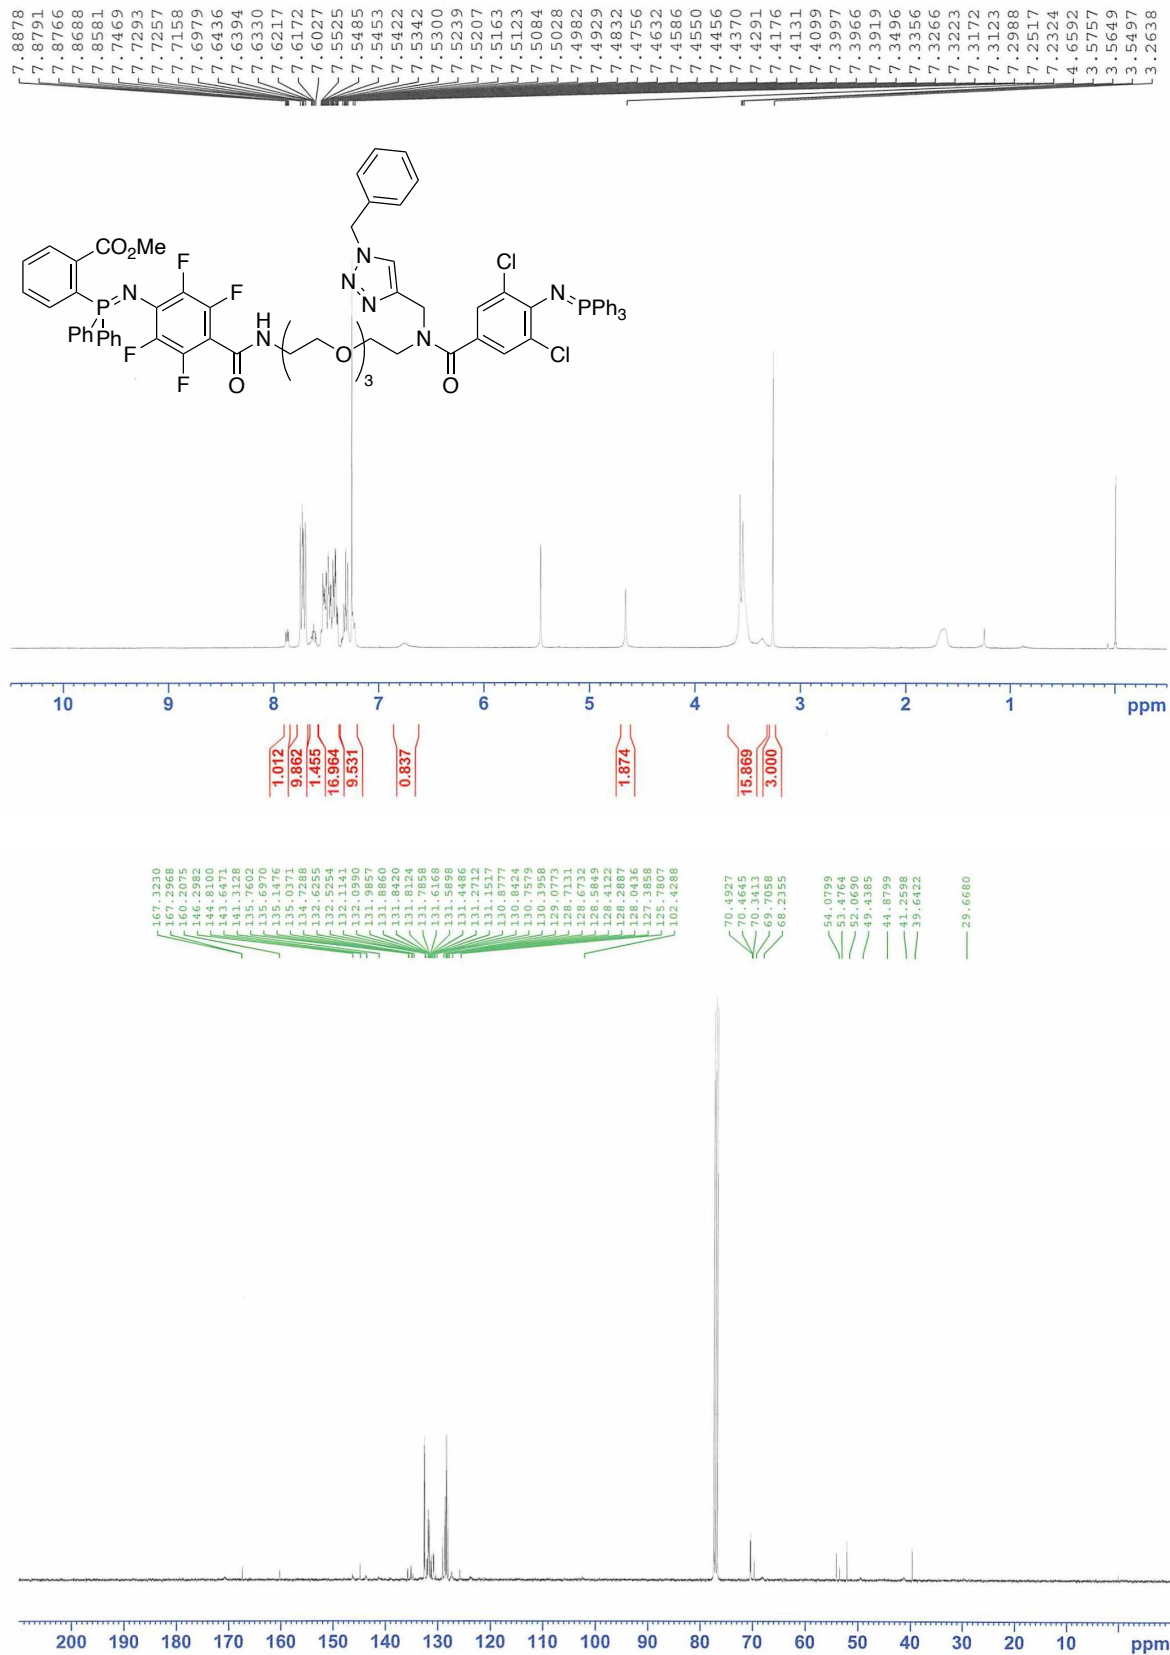

<sup>1</sup>H NMR (400 MHz) and <sup>13</sup>C NMR (101 MHz) spectra of methyl 6-((4-(15-(4-azido-2,3,5,6-tetrafluorophenyl)-2-(4-azido-3,5-dichlorobenzoyl)-15-oxo-5,8,11-trioxa-2,14-diazapentadecyl)-1H-1,2,3-triazol-1-yl)methyl)nicotinate (**19**)(CDCl<sub>3</sub>)

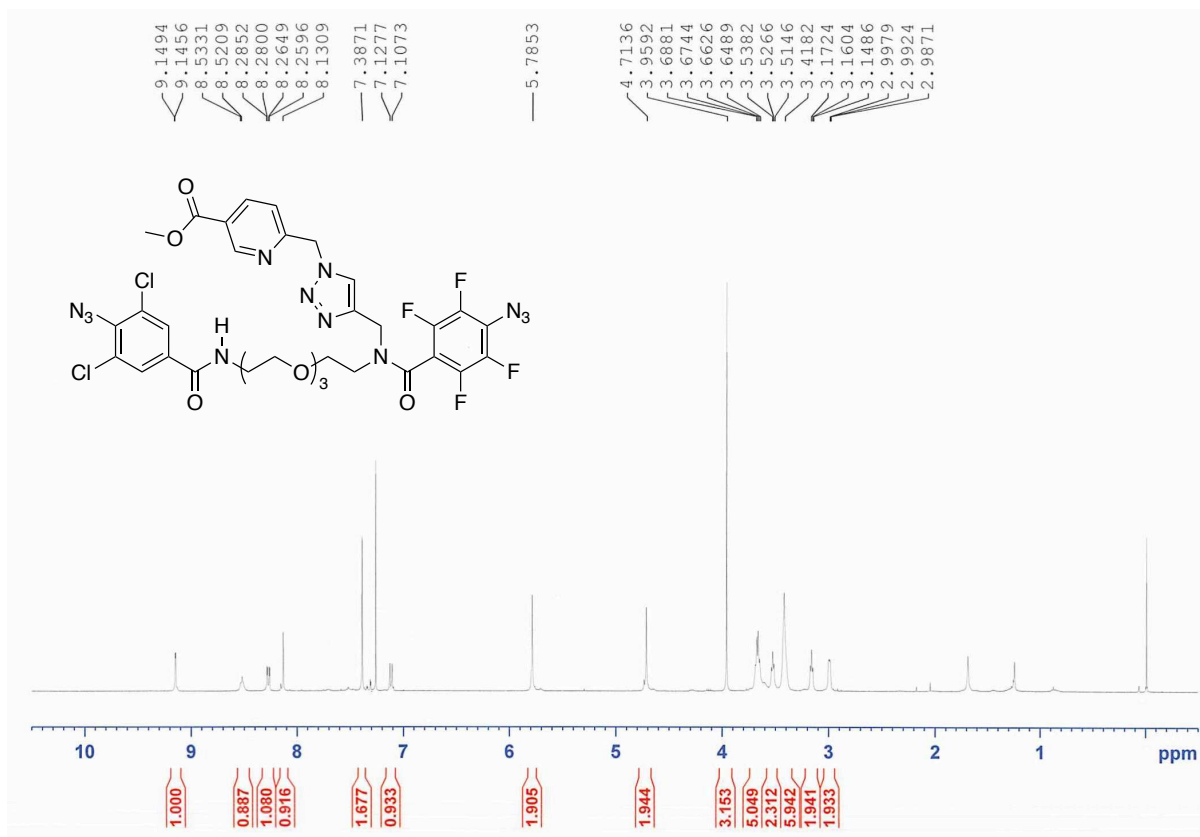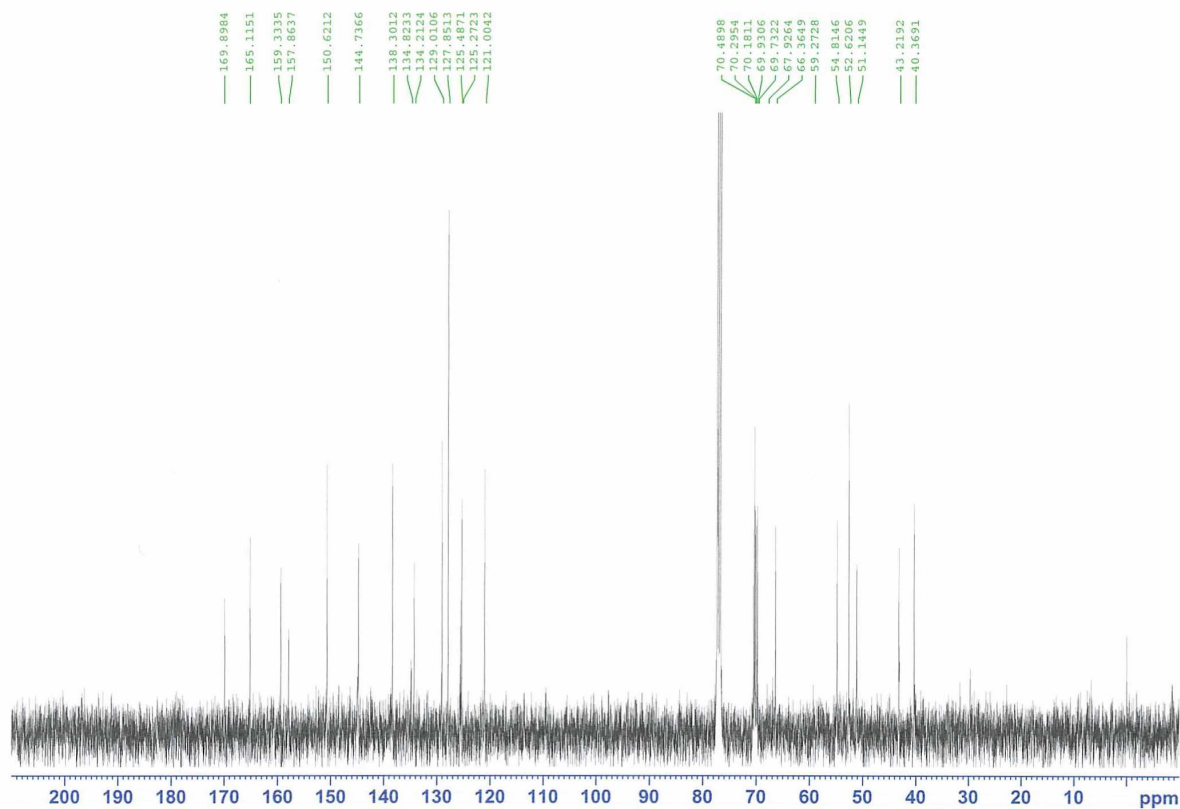

<sup>1</sup>H NMR (400 MHz) and <sup>13</sup>C NMR (101 MHz) spectra of methyl 4-((2-(2-((6-chlorohexyl)oxy)ethoxy)ethyl)carbamoyl)-2-(diphenylphosphanyl)benzoate (**20**) (CDCl<sub>3</sub>)

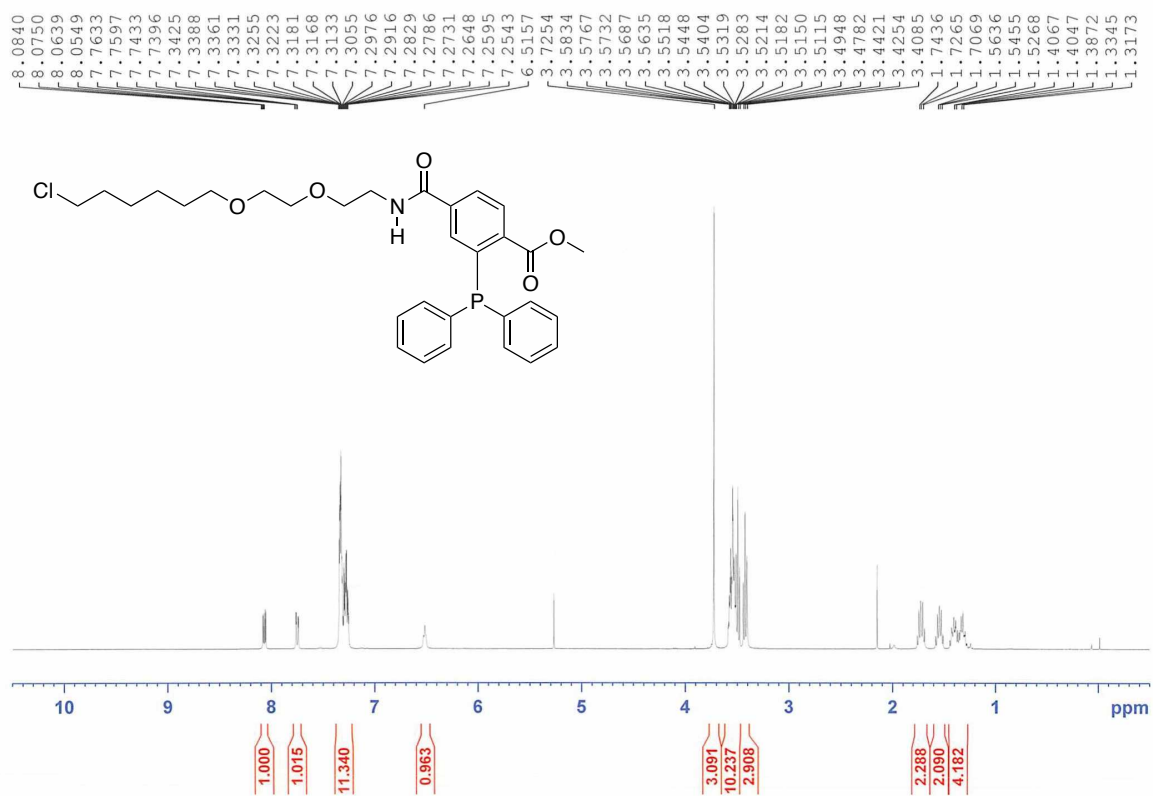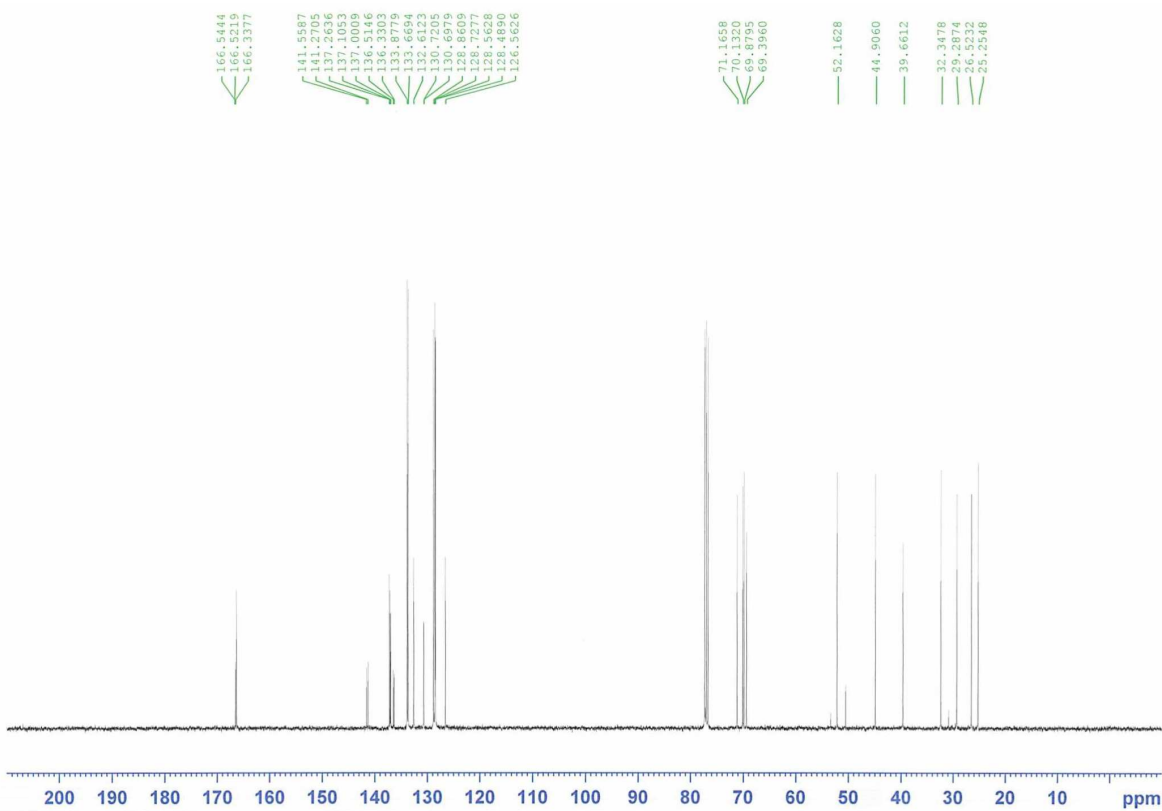

$^1\text{H}$  NMR (400 MHz) and  $^{13}\text{C}$  NMR (101 MHz) spectra of 4-(diphenylphosphanyl)-*N*-((11-oxo-2,3,6,7-tetrahydro-1*H*,5*H*,11*H*-pyrano[2,3-*f*]pyrido[3,2,1-*ij*]quinolin-9-yl)methyl)benzamide (**21**) ( $\text{CDCl}_3$ )

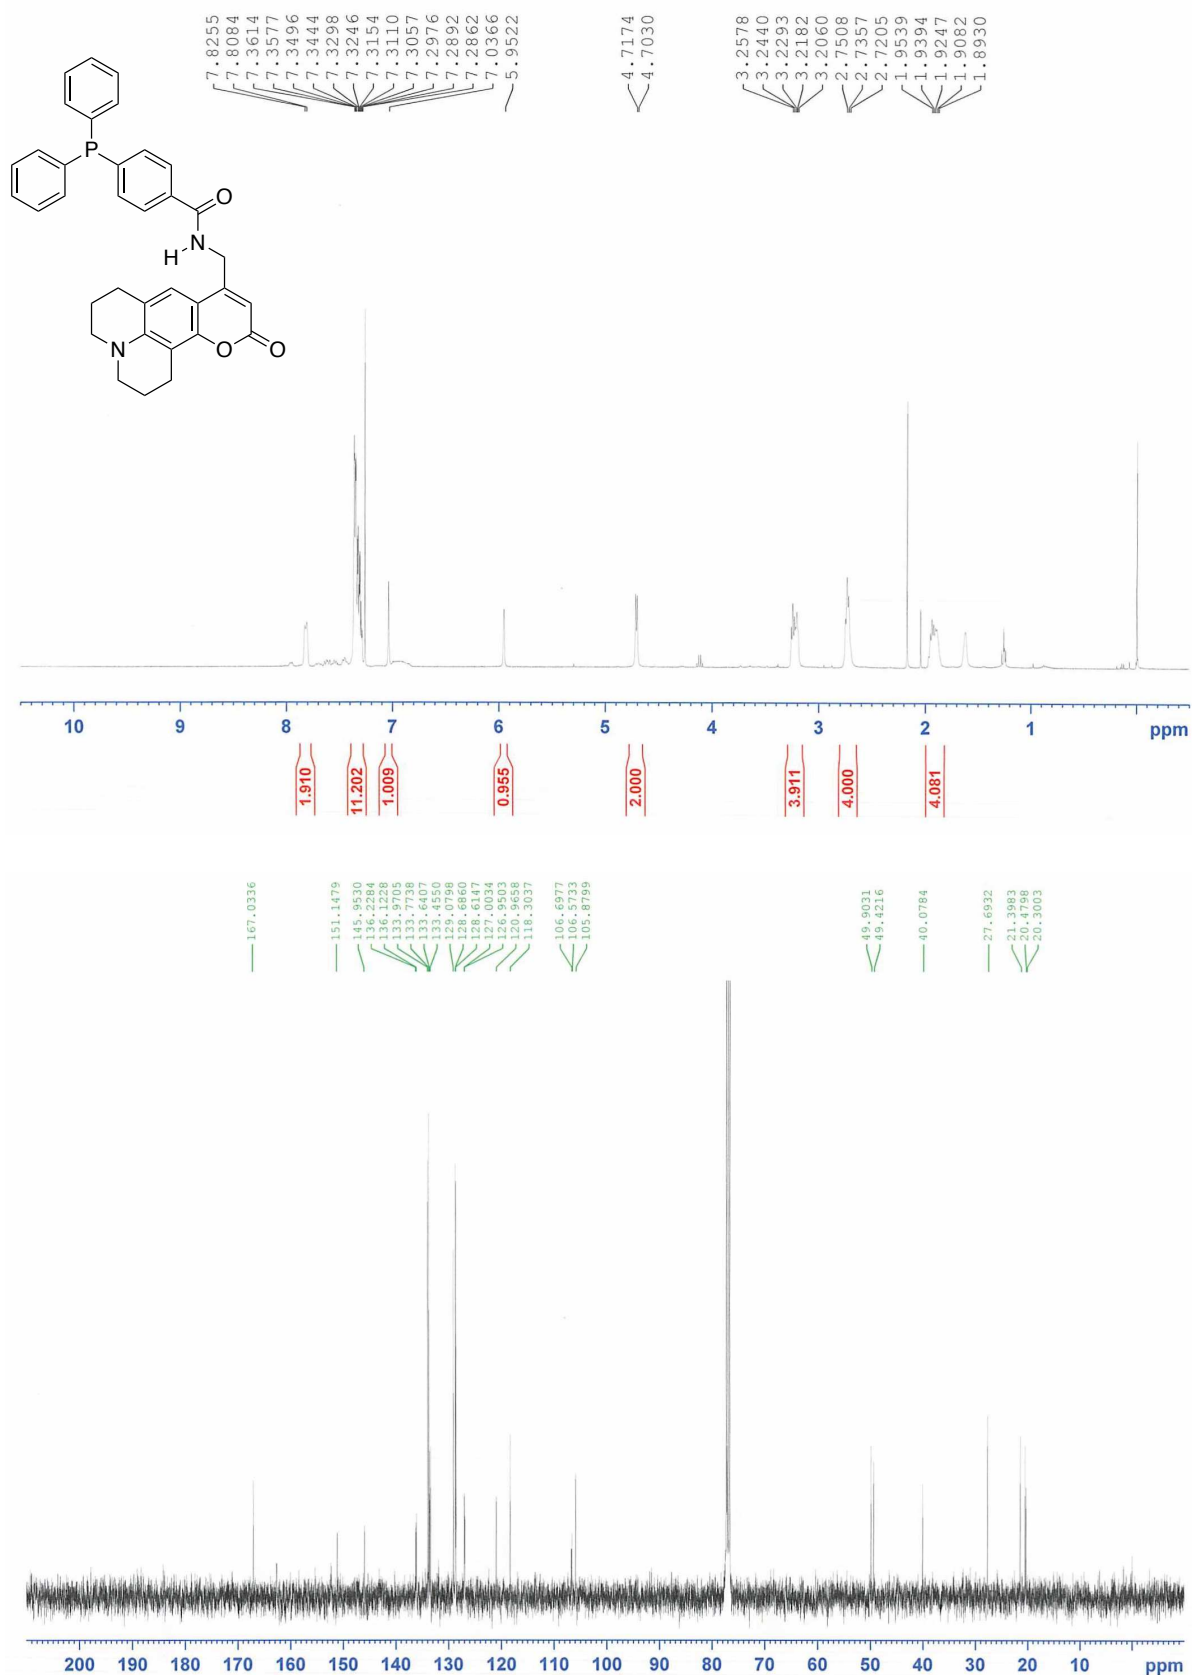

<sup>1</sup>H NMR (400 MHz) and <sup>13</sup>C NMR (101 MHz) spectra of methyl 2-(*N*-(4-((12-(4-azido-3,5-dichlorobenzoyl)-3,6,9-trioxa-12-azapentadec-14-yn-1-yl)carbamoyl)-2,3,5,6-tetrafluorophenyl)-*P,P*-diphenylphosphorimidoyl)-4-((2-(2-((6-chlorohexyl)oxy)ethoxy)ethyl)carbamoyl)benzoate (**S2**) (CDCl<sub>3</sub>)

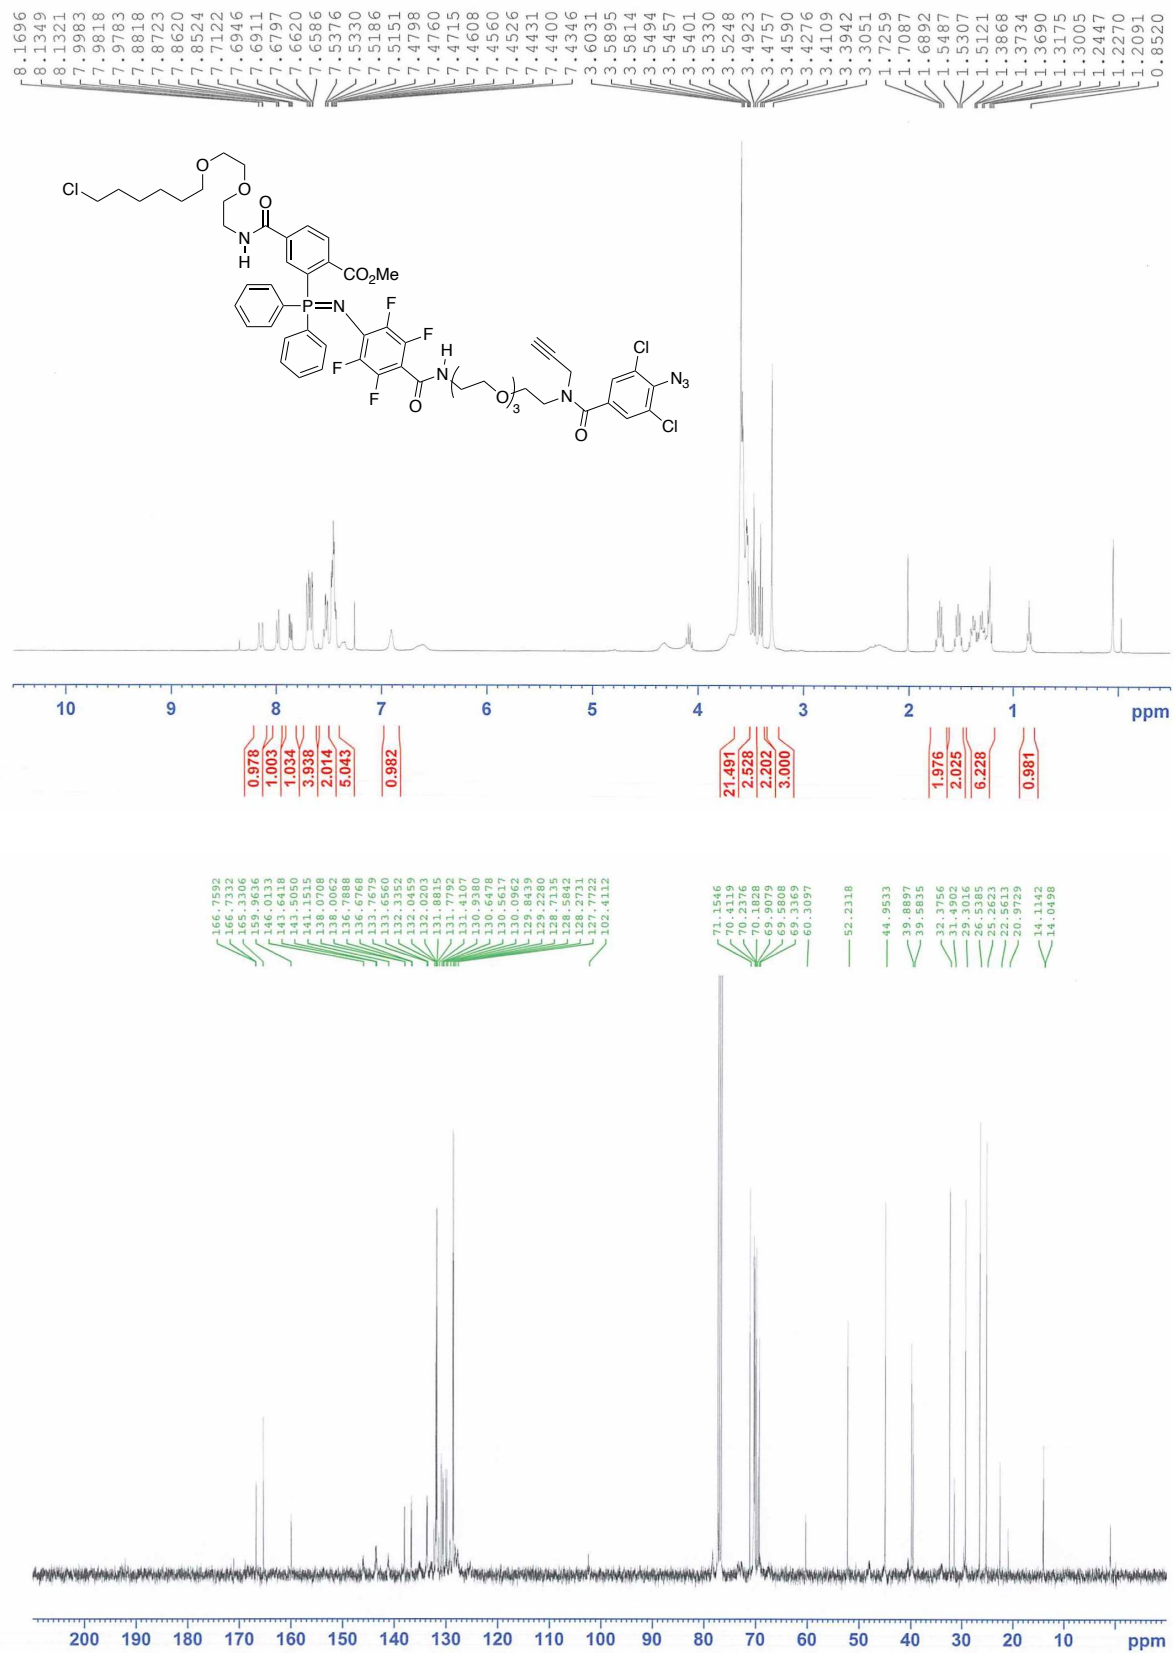



<sup>1</sup>H NMR (400 MHz) and <sup>13</sup>C NMR (101 MHz) spectra of methyl 4-((2-(2-((6-chlorohexyl)oxy)ethoxy)ethyl)carbamoyl)-2-(*N*-(4-(((12-(3,5-dichloro-4-(((4-(((11-oxo-2,3,6,7-tetrahydro-1*H*,5*H*,11*H*-pyrano[2,3-*f*]pyrido[3,2,1-*ij*]quinolin-9-yl)methyl)carbamoyl)phenyl)diphenyl-λ<sup>5</sup>-phosphanylidene)amino)benzoyl)-3,6,9-trioxa-12-azapentadec-14-yn-1-yl)carbamoyl)-2,3,5,6-tetrafluorophenyl)-*P,P*-diphenylphosphorimidoyl)benzoate (**S4**) (CDCl<sub>3</sub>)

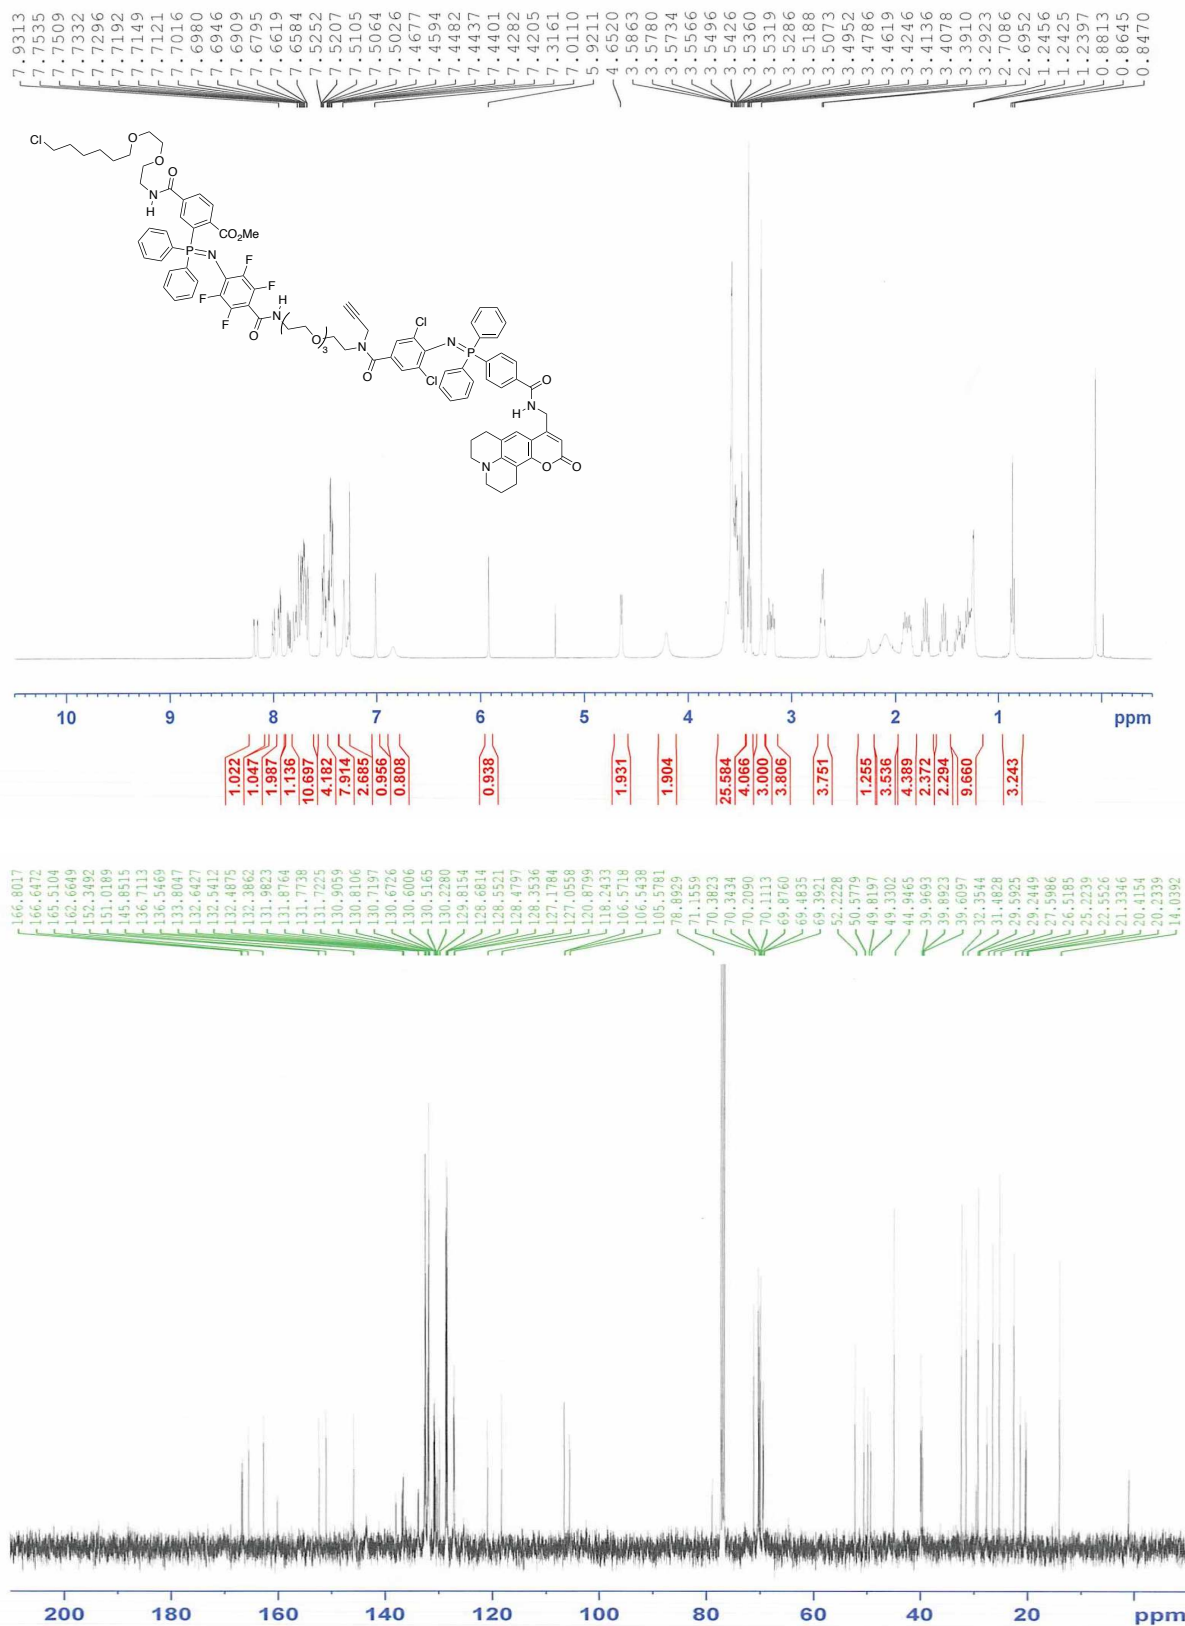

<sup>1</sup>H NMR (400 MHz) and <sup>13</sup>C NMR (101 MHz) spectra of methyl 4-((2-(2-((6-chlorohexyl)oxy)ethoxy)ethyl)carbamoyl)-2-(*N*-(4-(((1-(3,5-dichloro-4-(((4-(((1-oxo-2,3,6,7-tetrahydro-1*H*,5*H*,11*H*-pyrano[2,3-*f*]pyrido[3,2-*i*]-quinolin-9-yl)methyl)carbamoyl)phenyl)diphenyl-λ<sup>5</sup>-phosphanylidene)amino)phenyl)-1-oxo-2-((1-(2-(2-(5-(2-oxohexahydro-1*H*-thieno[3,4-*d*]imidazol-4-yl)pentanamido)ethoxy)ethyl)-1*H*-1,2,3-triazol-4-yl)methyl)-5,8,11-trioxa-2-azatridecan-13-yl)carbamoyl)-2,3,5,6-tetrafluorophenyl)-*P*,*P*-diphenylphosphorimidoyl)benzoate (**23**) (CDCl<sub>3</sub>)

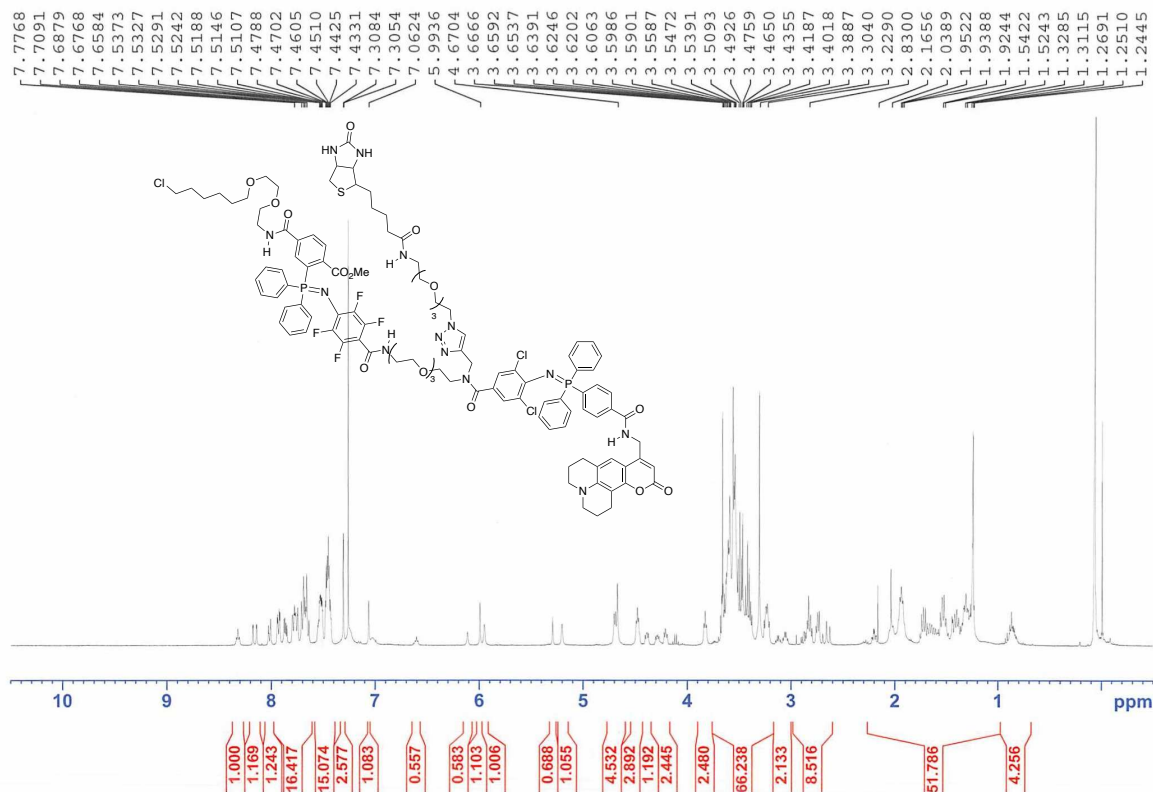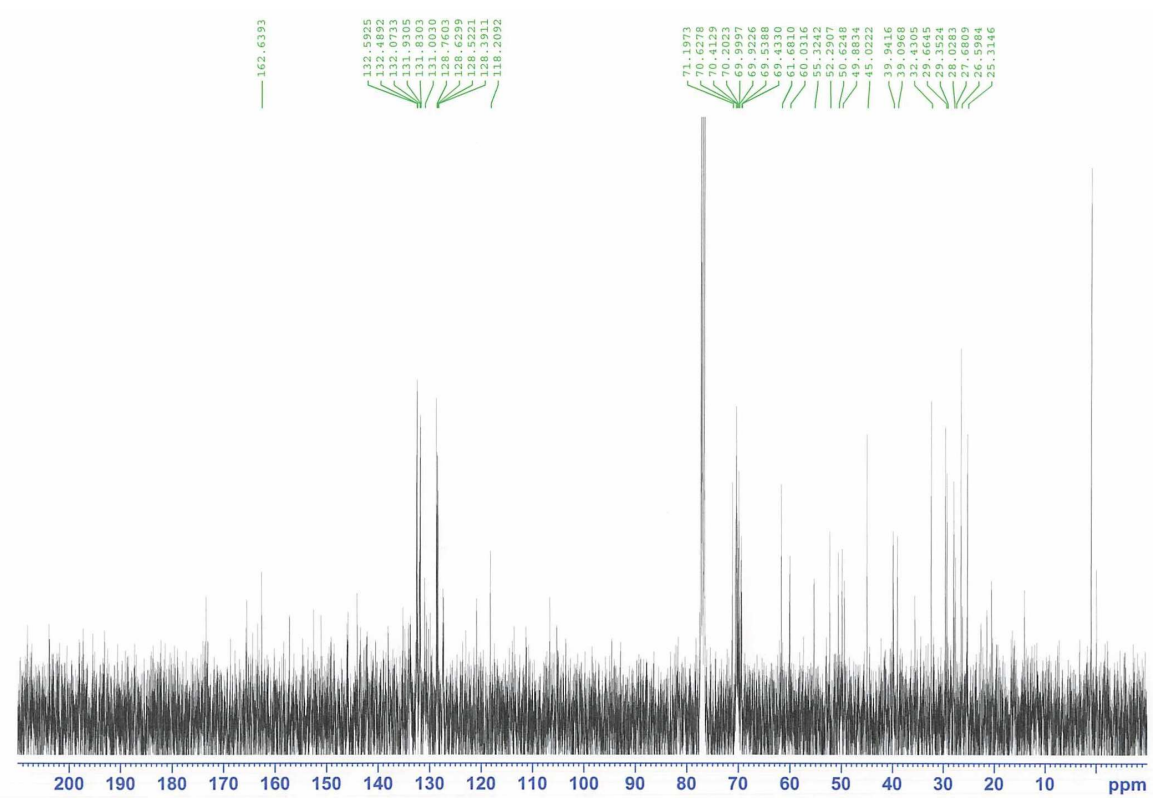

Supplement: d4cc02723j1.pdf [file d4cc02723j1.pdf]
